# Supplementary material
Source: HighWire-hosted journal article supplement (https://bjsm.bmj.com/content/52/21/1367)
Supplement: inline-supplementary-material-1 [file inline-supplementary-material-1.docx]

Online Supplement

**1) Additional results**

*Study characteristics*

Randomized controlled trials (RCTs)

- Gestational diabetes mellitus: There were 46 RCTs (n=14,923 women), including 26 exercise only interventions (1-26) and 23 exercise + co-interventions. (14, 21, 26-46) Three studies included two intervention arms (exercise-only intervention and exercise + co-intervention). (14, 21, 26) One trial was not included in the meta-analysis; this trial involved counselling about a healthy lifestyle during pregnancy which included advice and recommendations to be physically active during pregnancy. (46)

The exercise-only interventions included aerobic exercise alone, (10, 14, 15, 17, 18, 24, 25) resistance training alone, (1, 2) pelvic floor muscle training alone, (12) or various types of exercise. (3-9, 11, 13, 16, 19-23, 26) Seven of the 26 exercise-only interventions included only women who were previously inactive (1, 4, 6, 10, 11, 13, 23) and 19 included women whose previous physical activity levels were unspecified, (2, 3, 5, 7-9, 12, 14-22, 24-26) 17 included women of various BMI (1-7, 9, 11-13, 15, 18, 19, 22, 24, 25) and 10 included only women with overweight/obesity pre-pregnancy, (8, 10, 13, 14, 16, 17, 20, 21, 23, 26) 18 involved exercise that was supervised by a member of the study team at least once every two weeks (1-9, 12, 13, 15, 16, 18, 22-25) and eight involved exercise that was unsupervised. (10, 11, 14, 17, 19-21, 26)

- Gestational hypertension: There were 34 RCTs (n=9,755 women), including 24 exercise-only interventions (1, 3-10, 13-15, 17, 18, 22, 23, 47-54) and 11 exercise + co-interventions. (14, 28, 31, 32, 35, 38, 40-42, 55, 56) One study included two intervention arms (exercise-only intervention and exercise + co-intervention). (14) Two superiority trials were not included in the meta-analysis because they did not include a control group. In these trials, women were randomized to either a walking or stretching intervention (53) or to a muscle conditioning or combined muscle conditioning and aerobic intervention. (54)

The exercise-only interventions included aerobic exercise alone, (10, 14, 15, 17, 18, 48) resistance training alone, (1) or various types of exercise. (3-9, 13, 22, 23, 47, 49-52) Twelve trials included women who were previously inactive (1, 4, 6, 10, 13, 23, 47, 49-51, 53, 54) and 12 included women whose previous physical activity levels were unspecified, (3, 5, 7-9, 14, 15, 17, 18, 22, 48, 52) 17 included women of various BMI (1, 3-7, 9, 13, 15, 18, 22, 47-54) and six included only women with overweight/obesity pre-pregnancy, (8, 10, 13, 14, 17, 23) 18 involved exercise that was supervised by a member of the study team at least once every two weeks (1, 3-9, 13, 15, 18, 22, 23, 47-51, 54) and four exercise that were unsupervised. (10, 14, 17, 52, 53) One trial included women with type 1 diabetes. (55)

- Preeclampsia: There were 27 RCTs (n=10,256 women) including 16 exercise-only interventions (2, 8, 10, 14, 15, 17, 18, 22, 24, 48, 51, 53, 57-60) and 12 exercise + co-interventions. (14, 28, 30-32, 35, 36, 40-43, 61) One study included two intervention arms (exercise-only intervention and exercise + co-intervention). (14) One superiority trial, in which women were randomized to a walking or stretching intervention, was not included in the meta-analysis because it did not include a control group. (53)

The exercise-only interventions included aerobic exercise alone, (10, 14, 15, 17, 18, 24, 48, 57, 58, 60) resistance training alone, (2) or various types of exercise. (8, 22, 51, 59) Five trials included women who were previously inactive (10, 51, 53, 57, 58, 60) and 10 included women whose previous physical activity levels were unspecified (2, 8, 14, 15, 17, 18, 22, 24, 48, 59), 11 included women of various BMI (2, 15, 18, 22, 24, 48, 51, 53, 57-60) and four included only women with overweight/obesity pre-pregnancy (8, 10, 14, 17), 10 involved exercise that was supervised by a member of the study team at least once every two weeks (2, 8, 15, 18, 22, 24, 48, 51, 57, 58) and five exercise that were unsupervised (10, 14, 17, 53, 59, 60).

Non-Randomized Interventions

- Gestational diabetes mellitus: There was one non-randomized exercise-only intervention (n=7) that could not be included in the meta-analysis because it did not include a control group. (62) This study included women with previous GDM and involved exercise that was supervised by a member of the study team at least once every two weeks. There were five non-randomized exercise + co-interventions (n=524 women). (63-67) One study (67) could not be included in the meta-analysis. Among them, four trials included women with overweight/obesity (63, 64, 66, 67) and one trial included women at “high risk for GDM” (as defined by the authors). (65)

- Gestational hypertension: There were two non-randomized exercise-only interventions (n=367 women) that could not be included in the meta-analysis because they did not include a control group. (68, 69) Both involved exercise that was supervised by a member of the study team at least once every two weeks. There were two non-randomized exercise + co-interventions (n=219 women). (66, 67) One study (67) could not be included in the meta-analysis. Both included women with pre-pregnancy overweight/obesity.

- Preeclampsia: There was one non-randomized exercise-only intervention (n=7) that could not be included in the meta-analysis because it did not include a control group. (62) This study included women with previous GDM and involved exercise that were supervised by a member of the study team at least once every two weeks. There were three non-randomized exercise + co-interventions (n=577 women). (66, 67, 70) One study (67) could not be included in the meta-analysis. Two studies included women with pre-pregnancy overweight/obesity. (66, 67)

*Characteristics of Exercise Interventions in Randomized and Non-Randomized Controlled Trials*

The frequency of the prescribed exercise for the exercise-only interventions ranged from 1 to 7 times per week. The majority of the studies identified moderate intensity exercise as their target intensity (Borg scale 12-14/20). The duration of each exercise session ranged from 10 to 90 minutes. The types of exercise included in mixed interventions were walking, swimming, cycling, water gymnastics, resistance training, stretching, yoga or pelvic floor muscle training. A summary of study characteristics is provided in Online Supplement Table 1.

Observational studies

- Gestational diabetes mellitus: There were 14 **cohort studies** (n=14,961 women); (71-84) six of them (n=5,366 women) could not be included in the meta-analysis. (80-84) There were seven **cross-sectional studies** (n=17,829 women); (85-91) three of which (n=12,189 women) could not be included in the meta-analysis. (85-87) There were three **case-control studies** (n=847 women); (92-94) one of which (n=200 women) could not be included in the meta-analysis. (94) Exercise was assessed using self-report or questionnaires.

- Gestational hypertension: There were eight **cohort studies** (n=81,497 women); (72, 74, 75, 78, 79, 81, 82, 95) three of them (n=76,260 women) could not be included in the meta-analysis. (81, 82, 95) There were five **cross-sectional studies** (n=6,013 women); (90, 96-99) one of them (n=3,348 women) could not be included in the meta-analysis. (99) There were four **case-control studies** (n=75,774 women). (100-103) Exercise was assessed using self-report or questionnaires.

- Preeclampsia: There were nine **cohort studies** (n=143,742 women); (73, 76-78, 81, 82, 95, 104, 105) three of them (n=76,260) could not be entered into the meta-analysis. (81, 82, 95) There were two **cross-sectional studies** (n=2,702 women) (91, 98) and four **case-control studies** (n=5,618 women). (100, 102, 103, 106) Exercise was assessed using self-report or questionnaires.

**Results for non-randomized interventions and observational studies**

Note: The results from RCTs are in the manuscript.

*Gestational diabetes mellitus*

There was “very low” quality evidence (downgraded due to serious risk of bias and inconsistency) from one (n=7) non-randomized supervised exercise-only intervention that did not include a control group. (62) Three cases of GDM (43%) were reported in this study (Online Supplement Table 1). Moreover, there was “very low” quality evidence from five non-randomized trials including exercise + co-interventions (n=524) (63-67) indicating lower odds of developing GDM with prenatal exercise. The quality of evidence was downgraded due to serious risk of bias and indirectness of the interventions (exercise + co-interventions were assessed) that reduced the level of confidence in the observed effects. The pooled estimate was based on four studies (n=346; OR 0.47, 95% CI 0.25, 0.88, I2 16%; Online Supplement Figure 5). (63-66) One additional study (67) that could not be included in the meta-analysis indicated there was no reduction in GDM in women who participated in a program of health education around diet and exercise compared to those who did not participate in the intervention (n=178; OR 1.08, 95% CI 0.37, 3.15; adjusted for gravidae, parity, maternal age, ethnicity, home ownership and marital status) (Online Supplement Table 1).

There was “very low” quality evidence (downgraded due to serious risk of bias) from 14 cohort studies (n=14,961) (71-84) showing lower odds of developing GDM in women who exercised during pregnancy versus those who did not. The pooled estimate was based on nine studies (n=9,595; OR 0.69, 95% CI, 0.54, 0.88, I2 0%; Online Supplement Figure 6). (71-79) Five cohort studies (n=5,366) could not be included in the meta-analysis (Online Supplement Table 1). (80-84) Of these, three studies reported lower odds of developing GDM with prenatal physical activity compared to no exercise, as assessed by daily energy expenditure (per 100 kcal/day; n=612; OR 0.89, 95% CI 0.79, 0.99), (83) daily step counts (per 1 standard deviation in step counts; n=759; OR 0.81, 95% CI 0.66, 0.99) (84) or mid-pregnancy highest level (i.e. highest quartile) of sports/exercise (from the Kaiser Physical Activity Survey, KPAS) (n=1,006; OR 0.1, 95% CI 0.0, 0.7; adjusted for age and pre-pregnancy BMI). (80) However, two studies found no association between physical activity (total or related specifically to sports/exercise, from the [KPAS (82) or the Pregnancy Physical Activity Questionnaire [PPAQ]) and GDM. (81) Meeting ACOG recommendations or not for physical activity (150 minutes/week of MVPA) was not associated with GDM. (81) Finally, data from the OMEGA study were used to examine the association between different physical activity exposures and GDM. Some data were included in the meta-analysis (77) and other data were not. (107) Compared to no leisure time physical activity (LTPA), a women in the highest tertiles of LTPA had significantly reduced odds of GDM (24.1-220 MET hrs/week, OR 0.53, 95% CI 0.33-0.86; 5.51-35 total hours/week, OR 0.58, 95% CI 0.36-0.93) (Online Supplement Table 1).

“Very low” quality evidence (downgraded due to serious risk of bias) from seven cross-sectional studies (n=17,829) (85-91) showed lower odds of developing GDM with prenatal physical activity. The pooled estimate included four studies (n=5,640; OR 0.66, 95% CI 0.45, 0.97, I2 0%; Online Supplement Figure 7). (88-91) However, three studies (n=12,189) that could not be included in the meta-analysis found no effect of prenatal physical activity on GDM (Online Supplement Table 1). (85-87) Li et al (86) reported that physical activity (measured using the International Physical Activity Questionnaire, IPAQ) was not associated with GDM (multiple regression, reference group not defined). (86) Similarly, Momeni-Javid reported no association between prenatal physical activity (from the PPAQ) and GDM (OR 0.98, 95% CI 0.96, 1.01; Reference group not defined) (87). However, one study reported lower odds of GDM with moderate to high activity (defined as LTPA >3h/week, commuting to work by physical activity >30 minutes/week, and house work consisting of more hard work such as farming) (OR 0.81, 95% CI 0.67, 0.97; Reference group was low LTPA [<3h/week]). (85) Moreover, one cross-sectional study reported data that were included in the meta-analysis and data that were not. (88) Data not reported in the pooled results showed no association between exercise of any intensity (light, moderate, or vigorous) and odds of GDM (Online Supplement Table 1).

Finally, there was “very low” quality evidence (downgraded due to inconsistency and imprecision) from three case-control studies (n=847) showing that prenatal physical activity was not associated with GDM. The pooled estimate included two studies (n=647, OR 0.63, 95% CI, 0.30, 1.31, I2 50%; Online Supplement Figure 8). (92, 93) One study (n=200) could not be included in the meta-analysis and found no association between physical activity (evaluated using the PPAQ) and GDM, no matter the intensity of physical activity (Online Supplement Table 1). (94)

*Gestational hypertension*

There was “very low” quality evidence (downgraded due to serious risk of bias, indirectness and imprecision) from two non-randomized exercise-only interventions (n=367) that could not be included in the meta-analysis because both studies did not include a control group (Online Supplement Table 1). (68, 69) Narendran et al. (68) reported no difference in pregnancy-induced hypertension between women who practiced yoga (n=169) and those who walked for 60 minutes every day (n=166) (18% vs 23%, p=0.25) and O’Connor et al. (69) reported one case of severe hypertension (among 32 women, 3%) during a strength training intervention. There were two additional non-randomized exercise + co-interventions (n=219) showing a protective effect of prenatal exercise on GH. One study showed no effect (n=41, OR 2.0, 95% CI 0.17, 23.96, I2 not applicable; Online Supplement Figure 13). (66) However, another study (n=178) (67) that could not be included in the meta-analysis indicated there were lower odds of developing GH in women who participated in a program of health education around diet and exercise compared to those who did not participate in the intervention (OR 0.05, 95% CI 0.01, 0.39; adjusted for gravida, parity, maternal age, ethnicity, home ownership and marital status) (Online Supplement Table 1).

“Very low” quality evidence (downgraded due to serious risk of bias and imprecision) from eight cohort studies (n=81,497; (72, 74, 75, 78, 79, 81, 82, 95) pooled estimate included five studies [n=5,237] (72, 74, 75, 78, 79)) and from five cross-sectional studies (n=6,013; (90, 96-99) pooled estimate included four studies [n=2,665] (90, 96-98)) showed that prenatal physical activity did not affect the odds of developing GH (Online Supplement Figures 14 and 15). Three cohort studies (n=76,260) (81, 82, 95) and one cross-sectional study (n=3,348) (99) could not be included in the meta-analysis (Online Supplemental Table 1). Overall, no association between prenatal physical activity and GH was reported. Juhl et al. (95) studied 73,271 women and found no association between either changes in physical activity from early/mid to late pregnancy, or early and late pregnancy physical activity frequency (0/week; 1-2/week; >3/week, multivariable model), and GH. Similarly, no association was reported between high physical activity (total or sport/exercise, defined as highest tertile, from the PPAQ) or meeting ACOG recommendations for physical activity in early pregnancy and odds of developing GH. (81) However, Currie et al. (82) reported 49% lower odds of developing GH (n=1,749; OR 0.59, 95% CI 0.36, 0.96; adjusted for maternal age, pre-pregnancy BMI, education, and parity) with medium activity score (2nd tertile) related to total physical activity (from the KPAS) compared to low activity score (1sttertile) and Martin et al. (99) found lower odds of developing GH in women who self-reported having been active at least once a week over the last 3 months of their pregnancy compared to those reporting having been inactive (1-4/week: OR 0.59, 95% CI 0.42, 0.82; ≥5/week: OR 0.41, 95% CI 0.18, 0.92). Finally, one cohort study (78) examined different exposures of prenatal physical activity (total LTPA or sport, examined as weekly duration or intensity). Some data were included in the meta-analysis and other data were not. Data not included in the pooled results showed no effect of prenatal physical activity on GH, regardless of how physical activity was examined (Online Supplement Table 1) (78).

Similarly, there was “very low” quality evidence (downgraded due to serious risk of bias, inconsistency and imprecision) from four case-control studies (n=75,774) (100-103) showing that prenatal physical activity did not affect the odds of developing GH. However, subgroup analysis showed that the pooled estimate for GDM women were significantly different than for non-GDM women (p=0.03). Specifically, prenatal physical activity reduced the odds of developing GH in GDM women by 30% compared to no physical activity (n=70,686; OR 0.70, 95% CI 0.68, 0.72, I2 not applicable; Online Supplement Figure 16). (101) One study (100) reported data that were included in the pooled results and other data that were not. Data not included in the pooled results showed no association between LTPA during the first 20 weeks of pregnancy and GH, regardless of how LTPA was examined (hours/week, energy expenditure as kcal/min or kcal/week) (Online Supplement Table 1).

*Preeclampsia*

There was “very low” quality evidence (downgraded due to serious risk of bias and inconsistency) from one (n=7) non-randomized supervised exercise-only intervention that could not be entered into the meta-analysis because it did not include a control group (Online Supplement Table 1) (62). One case of GDM (14%) was reported in this study. Moreover, there was “very low” quality evidence (downgraded due to serious risk of bias, indirectness and imprecision) from three non-randomized exercise + co-interventions (n=577) (66, 67, 70) indicating that prenatal exercise did not affect the odds of developing PE (Pooled estimate included two studies [n=399]. Online Supplement Figure 21). (66, 70) One study (67) that could not be entered into the meta-analysis showed lower odds of developing PE in women who participated in a program of health education around diet and exercise (n=89) compared to those who did not participate in the intervention (n=89) (OR 0.103, 95% CI 0.011, 0.901, adjusted for gravida, parity, maternal age, ethnicity, home ownership and marital status (Online Supplement Table 1).

Similarly, there was “very low” quality evidence (downgraded due to serious risk of bias and imprecision) from two cross-sectional studies (n=2,702. Online Supplement Figure 22) (91, 98) showing that prenatal physical activity did not affect the odds of developing PE.

However, “very low” quality evidence (downgraded due to serious risk of bias) from nine cohort studies (n=143,742; (73, 76-78, 81, 82, 95, 104, 105) pooled estimate included six studies [n=67,482]; OR 0.87, 95% CI, 0.78, 0.97, I2 9%. Online Supplement Figure 23) (73, 76-78, 104, 105) and from four case-control studies (n=5618; OR 0.75, 95% CI 0.59, 0.96, I2 25%; Online Supplement Figure 24) (100, 102, 103, 106) showed lower odds of developing PE with prenatal physical activity. Three cohort studies (n=76,260) could not be entered into the meta-analysis and found no association between prenatal physical activity and PE, regardless of the intensity or volume of physical activity (Online Supplement Table 1). (81, 82, 95) Moreover, three cohort studies (78, 105, 108) and one case-control study (100) included in the pooled results reported additional data that could not be entered into the meta-analysis (Online Supplement Table 1). Rudra et al. (108) reported lower odds of developing PE with a high volume of LTPA compared to no LTPA (5.51 - 35 hrs/wk: OR 0.58, 95% CI 0.36-0.93), Magnus et al. (105) found lower odds of developing PE in normal weight women doing more than six activities per month compared to less than six activities (OR between 0.69 and 0.80, 95% CI 0.53-0.96) and Marcoux et al. (100) showed 47 to 43% lower odds of developing PE with heavy LTPA (>6 kcal/min or >841 kcal/week, respectively) compared to light/moderate LTPA (<6 kcal/min or <841 kcal/week, respectively). However, Vollebregt et al. (78) reported no association between prenatal physical activity and PE.

**2) Supplementary table 1:** Study Characteristics

| **Outcome** | **Author, year, country, study type** | **Sample Size (n)** | **Age, years** | **Complications/ Pre PA level** | **PA Assessment** | | | | | **Results** |
| --- | --- | --- | --- | --- | --- | --- | --- | --- | --- | --- |
| **Self-Reported/Objective and Total PA/LTPA** | **Definition PA groups** | **FITT** | **co-intervention** | **Compliance** |
| GDM | Bell et al., 1995, Australia, Cohort (71) | E: 88 C: 48 | E:  31.8 ± 2.7 C:  31.6 ± 4.7 | Women who exercise were women who already intended to exercise at least 5 / week during pregnancy. | Self-reported, LTPA | Women who were doing at least 3 exercise sessions per week at 25 weeks and 35 weeks were included as ‘exercisers’ in the analysis. Women who were doing at least 3 sessions of exercise weekly at 25 weeks but who had delivered by 35 weeks were also included. | 3+/week,  >50% HR max,  >30 min, various unsupervised activities |  |  | data in forest plot |
| GDM/GH | Hatch et al., 1993, USA, Cohort (72) | 462 | E:  27.9 ± 4.6 C:  27.1 ± 4.4 |  | Self-reported, LTPA | At each contact, subjects were asked the types of exercise they did during the preceding trimester and the time per week spent on each. Each subject's average weekly energy expenditure in LTPA was calculated as the product of intensity multiplied by number of minutes per week. Exercise was defined as "no exercise," "low-moderate exercise", and "heavy exercise". During each trimester of pregnancy, about 40 percent of the sample was exercising. | Frequency and duration not reported,  low-high intensity, aerobics/swimming/walking |  |  | data in forest plot |
| GDM/PE | Magann et al., 2002, USA, Cohort (73) | E (L): 222  E (M): 73  E (V): 238  C: 217 | E (L):  24.1 ± 5 E: (M):  25.4 ± 4.7 E (V):  24.7 ± 5.4 C:  23.7 ± 4.9 |  | Self-reported, total PA | E(L): women voluntarily exercised aerobically stopping at less than 20 weeks’ gestation, did mandatory exercise less than three times per week, but stopped at less than 28 weeks, or exercised five times per week, but stopped at less than 20 weeks. E(M): women voluntarily exercised aerobically, but stopped at less than 28 weeks, did mandatory exercise three times per week stopping after 28 weeks, or mandatory exercise five times per week stopping at less than 28 weeks. E(V) women voluntarily exercised at more than 28 weeks, did mandatory exercise stopping after 28 weeks, or did not stop mandatory exercise during the pregnancy. | 3-5/week, intensity not reported,  30 min,  aerobic exercise |  |  | data in forest plot |
| GDM/GH | Piravej et al., 2000, Thailand, cohort (74) | E: 86 C: 117 | E:  26.9 ± 3.0 C:  27.7 ± 5.4 | High-risk pregnancies (not defined but excluded hypertension, diabetes and renal disease). | Self-reported, LTPA | To be considered exercisers, women must have done PA on a regular basis other than the usual activity related to daily living or occupation. The qualified PA must be undertaken for a period of at least 20 min per session and 3 days/week. Such activities included walking, aerobic dancing, cycling, and swimming. | 3+/week, intensity not reported,  >20 min, walking/swimming/bicycling/aerobic dance |  |  | data in forest plot |
| GDM/GH | Barakat et al., 2009, Spain, RCT (1) | E: 80 E: 80 | E:  30.4 ± 2.9 C:  29.5 ± 3.7 | Sedentary | Objective, LTPA | Supervised exercise training starting 12-13 weeks gestation. 80 total prescribed sessions: the core portion consisted of toning and joint mobilization exercises that involved major muscle and joint groups. | 3/week,  <80% HR max,  35-40 min,  muscle conditioning |  | > 90%: attendance at exercise classes | data in forest plot |
| PE | Downs et al., 2007, USA, Cohort (104) | E: 41 C: 18 | 30.4 ± 4.6 |  | Self-reported, LTPA | Women’s third trimester exercise behavior was assessed with the following item: ‘I exercised ___ days a week during my third trimester of pregnancy’ ranging from 0 to 7 days a week. Exercise behavior was defined as engaging in moderate (e.g., brisk walking) to strenuous (e.g., running) PA for 3–5 days per week for a minimum of 20 min per session | 3-5/week, moderate to strenuous,  >20 min, various PA |  |  | data in forest plot |
| GDM/PE | Elden et al., 2008, Sweden, RCT (2) | Standard Care + Stabilizing Exercises (SC+E):  130  Standard Care (SC): 129 | SC:  30.4 ± 4.7 SC + E: 30.5 ± 4.4 | SC:  LTPA before pregnancy:  not at all 29(22%)  once a week 52(40%)  >2/ week 50(38%);  SC+E:  LTPA before pregnancy: not at all 50(38%) once a week 53(38%);  >2 /week 50(38%) | Self-reported, LTPA | Intervention received supervised sessions once per week for 6 weeks starting at 12-31 weeks gestation. Patients received treatments individually for a total of six hours during six weeks. They were told to integrate the exercises in daily activities and to exercise in short sessions on several occasions during the day | FIT not reported, stabilizing exercises |  | Not reported | data in forest plot |
| GDM | Hui et al., 2006, Canada, RCT (27) | E: 24 C: 21 | E:  26.2 ± 5.4 C:  26.2 ± 5.7 |  | Objective, LTPA | Supervised beginning 20-30 weeks gestation. Participants in the AI group were instructed in group-session exercises and on home-based exercise. Recommended activities included walking, swimming, mild aerobics, stretching and strength exercise. Video exercise instruction was produced in both VHS and DVD formats and provided to participants to assist with home-based exercise. | 3-5/week, intensity not reported,  30-45 min, walking/swimming/mild aerobics/  stretching and strength exercise | nutrition | 75% attended groups sessions ≥ 3 times (intervention started at 26 weeks gestation) | data in forest plot |
| PIH | Narendran et al., 2005, India, non-randomized intervention (68) | n=335 E: 169 C: 166 | E: 26 C: 26.5 | No previous yoga experience | Self-reported, LTPA | Exercise(I): yoga practices including physical postures and breathing techniques, and meditation were practiced by the yoga group, one hour daily, from the date of entry into the study until delivery Exercise(II): the control group walked half an hour twice a day (standard obstetric advice) during the study period | 7/week, intensity not reported,  60 min, yoga/walking |  | Not reported | Narrative summary  E(I): 31(18%) PIH E(II): 39(23%) PIH |
| GH/PE | Yeo et al., 2008, USA, RCT (53) | Exercise (walking): n=41 Control (stretching): n=38 | 32 | Sedentary; previously had PE | Self-reported, total PA | Intervention started at 18 weeks gestation. Walking Exercise: Walking exercise was defined as 40 min of walking five times a week at moderate intensity. Stretching exercises: The stretching exercise program consisted of 40 min of stretching exercise five times a week without increasing heart rate more than 10% of resting heart rate. The stretch movements consisted of slow muscle movements that had neither aerobic nor muscle resistance components. | 5/week, moderate,  40 min, walking/stretching |  | Although subjects were  told to exercise 5/week, in reality both groups exercised 2.5 to 4.5/week | Narrative summary  E(W):  9(22%) PIH;  6(14.6%) PE E(S):  15(40%) PIH;  1(2.6%) PE  **PE** (E(S))  OR 0.180 (95% CI 0.023-1.426) (Reference= E(W)) **PIH** (E(S))  OR 1.798 (95% CI 0.894-3.616) (Reference= E(W)) |
| GDM/GH | Barakat et al., 2012, Spain, RCT (3) | E: 40 C: 43 | E: 32 ± 4 C: 31 ± 3 | E:  8(20%) sedentary; 9(22.5%) some active; 17(42.5%) active;  6(15%) very active C:  14(32.6%) sedentary; 12(27.9%)  some active; 13(30.2%) active;  4(9.3%) very active | Objective, LTPA | Supervised exercise beginning at 6-9 weeks gestation. Aquatic sessions include swimming laps, jogging, walking, walking back and forth across the pool, stretching, lunges, step climbs, cross-country skiing movements and strength exercises in the water. Land sessions included a core session, which was preceded and followed by a gradual warm-up and cool down period (both of 7–8 min duration and consisting of walking and light, static stretching (avoiding muscle pain) of most muscle groups (upper and lower limbs, neck and trunk muscles). Resistance exercises were performed through the full range of motion normally associated with correct technique for each exercise and engaged the major muscle groups | 3/week,  <70% HR max,  25-45 min, Swimming/  Pelvic Floor Training (PFMT)/  Resistance Training/ Various/ Stretching/  Aerobic Dance/Joint mobilization/Relaxation exercise/Pelvic rocking exercise |  | 85%: adherence to the training program | data in forest plot |
| GH | Barakat et al., 2011, Spain, RCT (47) | E: 40 C: 40 | E: 31 ± 3 C: 30 ± 3 |  | Objective, LTPA | Supervised exercise starting 6-9 weeks gestation. Thus, an average of 85 training sessions was planned originally for each participant in the event of no preterm delivery. | 3/week,  70% HR max,  35-45 min, aerobic/resistance training |  | 90% attendance to classes | data in forest plot |
| PE | de Oliveria Melo et al., 2012, Brazil, RCT (57) | Exercise at 13 weeks: 62 E at 20 weeks: 62 C: 62 | E at 13 weeks: 24 ± 5.8 E at 20 weeks: 26 ± 5.3 C:  24 ± 5.4 | Sedentary at admission to the study (13 and 20 weeks). | Objective, LTPA | Supervised intervention began at 13 and 20 weeks | 3/week,  60-80% HR max/Borg: 12-16,  >15 min,  walking |  | Over 85% for both groups - attendance at sessions | data in forest plot |
| GDM/GH/PE | Guelinckx et al., 2010, Belgium, RCT (28) | E: 65 C: 65 | E:  28.0 ± 3.6 C:  29.4 ± 4.4 | OB  (BMI >29.0) | Self-reported, LTPA | Counseling using a brochure on nutrition, PA and limiting gestational weight gain during pregnancy plus 3 group meetings with a trained nutritionist. Unsupervised intervention starting at 15 weeks gestation. | most/all days of the week, moderate,  >30 min/day | nutrition | No reported | data in forest plot |
| GH/PE | Hopkins et al., 2010, New Zealand, RCT (48) | E: 47 C: 37 | 30 ± 4 | n/a | Self-reported, LTPA | Home based exercise starting at 19 weeks gestation, using stationary cycling, and was individually prescribed to a maximum of five sessions of 40-min aerobic exercise per week. Exercise programs aimed to achieve a moderate exercise intensity of approximately 65% of predicted aerobic capacity (VO2max) | 5/week,  65% VO2max,  40 min,  cycle ergometer |  | 75% ±17% of exercise prescribed performed | data in forest plots |
| GDM | Hui et al., 2012, Canada, RCT (29) | E: 102 C: 88 | E:  30.1 ± 5.2 C:  28.7 ± 5.9 |  | Objective, LTPA | Supervised intervention beginning at 20-26 weeks. A community-based exercise program specifically designed for pregnant women developed in our previous studies was provided to participants in the intervention group. Recommended exercise included walking, mild-to-moderate aerobic, stretching and strength exercises. An exercise regimen was recommended to participants in the intervention group. | 3-5/week,  light-moderate, 30-45 min, walking/  resistance training/  aerobics/  stretching | nutrition | 100% - exercise diary | data in forest plot |
| GH/PE | Juhl et al., 2010, Denmark, Cohort (95) | E(Swim): 10215 E(Bike): 8115  C: 54941 | n/a | Miscarriage defined as non-deliberate fetal death of an intrauterine pregnancy before 22 completed gestational weeks. | Self-reported, LTPA | We generated 3 exposure categories: (1) any reported swimming, (2) any reported bicycling but no swimming, and (3) no exercise. To evaluate the importance of time spent in swimming pools, we also calculated measures of association for 2 levels of time spent swimming and bicycling (90 and 90 minutes/week) relative to no exercise. | <90min/week or >90 min/week, intensity not reported, swimming or bicycling |  |  | Narrative summary  2264 (2.7%) PE  **Preeclampsia** >0-5 METhrs/wk  OR 1.05 (95% CI 0.91-1.21) >5-10 METhrs/wk  OR 0.95 (95% CI 0.84-1.09) >10-20 METhrs/wk  OR 0.95 (95% CI 0.82-1.09) >30-40 METhrs/wk  OR 1.10 (95% CI 0.82-1.26) >40 METhrs/wk  OR 1.29 (95% CI 0.88-1.90) Vig Ex: 1-74min/wk  OR 0.94 (95% CI 0.82-1.07) Vig Ex: 75-269min/wk  OR 0.87 (95% CI 0.70-1.10) Vig Ex: >270min/wk  OR 1.11 (95% CI 0.49-2.51)  Mod Ex: 1-74min/wk  OR 1.00 (95% CI 0.86-1.17) Mod Ex: 75-269min/wk  OR 0.99 (95% CI 0.88-1.11) Mod Ex: >270min/wk  OR 0.98 (95% CI 0.79-1.23) Mod/Vig PA: 1-74min/wk  OR 0.50 (95% CI 0.12-2.03) Mod/Vig PA: 75-269min/wk  OR 0.81 (95% CI 0.63-1.05) Mod/Vig PA: 270+min/wk  OR 1.08 (95% CI 0.73-1.58)  **Gestational Hypertension** Early Pregnancy 1-2/week vs 0  OR 1.01 (95% CI 0.91-1.13) 3+/week vs 0  OR 1.12 (95% CI 1.00-1.26) Late Pregnancy 1-2/week vs 0  OR 0.96 (95% CI 0.85-1.08) 3+/week vs 0  OR 1.05 (95% CI 0.91-1.21) |
| GDM/PE | Luoto et al., 2011, Finland, cluster RCT (30) | E: 246  C: 196 | E:  29.5 ± 4.8 C:  30.0 ± 4.7 | All women had at least one of the following risk factors:  1) BMI >25;  2) GDM;  3) glucose intolerance;  4) previous macrosomia;  5) type 1 or 2 diabetes in family;  6) age >40. | Objective, LTPA | Counselling intervention starting at 8-12 weeks gestation. Used both self-reported and objective (pedometer) measurement of PA. | most days, intensity not reported,  >800 MET/min/  week, counselling/LTPA | nutrition | 100%. All participants in the intervention group had self-reported home exercise for 3–5 /week between 20 and 36 weeks of gestation | data in forest plot |
| GDM/GH | Price et al., 2012, USA, RCT (4) | E: 31 C: 31 | E:  30.5 ± 5 C:  27.6 ± 7.3 | Sedentary |  | Supervised exercise starting at 12-14 weeks gestation. The intervention involved a program of supervised aerobic training. Subjects did step aerobics on the first day, walked as a group over adjacent hilly terrain on the second day, and performed circuit training on a third day. To make four exercise sessions per week, each woman also completed a brisk 30- to 60-min walk individually once weekly. | 4/week, moderate/  Borg 12-14,  45-60 min,  aerobic training |  | 93% compliance with the exercise prescription. | data in forest plot |
| GDM/GH | Cordero et al., 2012, Spain, RCT (5) | E: 40 C: 40 | E:  34.1 ± 4.7 C:  31.8 ± 2.6 | E:  22.2% sedentary; 14.8% occasionally active;  48.1% active  2-3x/week; 14.8% very active; C:  60% sedentary; 23.3% occasionally active;  13.3% active 2-3x/week;  3.3% very active | Objective, LTPA | Supervised; 2 land sessions per week, 15 min aerobic dance, 10 min RT, 10 min PFT; one water session per week, 30 min swimming and resistance (toning). | 3/week,  3-6 METs; <140bpm,  30-35 min, Swimming/  PFMT/  Resistance Training/  Stretching/  Aerobic Dance/Muscle Conditioning |  | 100% attended 65 of 80 classes (80%) | data in forest plot |
| GDM/GH/PE | Shirazian et al., 2010, USA, non-randomized intervention (66) | E: 28 C: 28 | E:  29.0 + 5.1 C:  24.4 + 5.6 | OB  (BMI >30) | Objective, total PA | Exercise and was goaled toward limiting pregnancy weight gain to no more than 15 pounds. Approximately six structured seminars were initiated by study coordinators in which overcoming barriers to healthy living, nutrition during pregnancy, food label reading, and exercise during pregnancy were emphasized. These seminars were followed by one-on-one counseling sessions and phone calls that monitor the women’s progress in the program. All study participants had at least five one-on-one counseling sessions or phone calls throughout their pregnancies with at least one session per trimester. | FITT not reported | nutrition | Not reported | data in forest plot |
| GDM/GH/PE | Stafne et al., 2012, Norway, RCT (31) | E: 429 C: 426 | E:  30.5 ± 4.4 C:  30.4 ± 4.3 | E: 34% reported no exercise at inclusion; 14% reported regular exercise at least 3x / week inclusion C: 12% said exercise regularly at least 3x / week at study entry | Objective, LTPA | Supervised exercise starting at 18-22 weeks gestation. Women in the intervention group received a standardized exercise program including aerobic activity, strength training, and balance exercises. In addition, women were encouraged to follow a written 45-min home exercise program at least twice per week (30 min of endurance training and 15 min of strength and balance exercises). Adherence to the protocol was defined as exercising 3 days per week or more at moderate to high intensity. Performing the exercise program was strongly emphasized and recorded in the women’s personal training diaries and through reports from the physiotherapists leading the training groups. | 1/week,  Borg: 13-14,  60 min | nutrition | E: 55% of women followed recommended exercise, 95% reported weekly PFMT;  C: 10% in control group exercised 3+ days / week at moderate to high intensity at follow-up". 79% reported weekly PFMT at follow-up | data in forest plot |
| GDM/GH | To et al., 2012, China, Cohort (75) | E: 24 C: 94 | E: 29.2  C: 31.4 | E: very physically active C: low activity | Self-reported, LTPA | Exercise: Weight-bearing exercises performed regularly over 10 h per week (at least five 2-h days per week). Control: no regular leisure exercises for more than 2hr/week | 5/week,  intensity not reported,  120 min,  weight bearing exercises |  |  | data in forest plot |
| GDM/GH/PE | Vinter et al., 2011, Denmark, RCT (32) | E: 180  C: 180 | E:  29 (27-32) C:  29 (26-31) | OB  (BMI >30) | Objective, LTPA | Supervised aerobic and resistance training plus dietary counselling starting between 10-14 weeks gestation. | 1/week,  moderate,  30-60 min, aerobics | nutrition | 56% - self reported | data in forest plot |
| GH | Weissgerber et al., 2010, Canada Cross-sectional (96) | E: 16 C: 9 | E:  32.0 + 3.7 C:  31.2 + 3.9 | E: active C: sedentary | Self-reported, total PA | Subjects completed a 3-day PA record on consecutive days within 2 weeks of the test to evaluate current PA. Chronic PA was evaluated using the Kaiser Physical Activity Survey (KPAS), which has been validated in non-pregnant and pregnant women. The survey was administered once to non-pregnant subjects, to assess PA during the past year, and twice to pregnant subjects, to assess PA during pregnancy and for 1 yr before conception. Mean voluntary PA and the sports and exercise index were calculated. | Frequency not reported,  E:257kcal/week C: 7kcal/week,  duration not reported,  KPAS |  |  | data in forest plot |
| GDM/GH | Barakat et al., 2013, Spain, RCT (6) | E: 210 C: 218 | E: 31 + 3 C: 31 + 4 | Sedentary;  Not exercising  > 20 min > 3x  / week | Objective, LTPA | The supervised exercise intervention group trained from weeks 10 to 12 of pregnancy to the end of the third trimester (weeks 38–39). Thus, an average of 85 training sessions was originally planned for each participant in the event of no preterm delivery. The intervention involved aerobic exercises, muscle strength and flexibility, and met the standards of the American College of Obstetricians and Gynaecologists | 3/week, 10-12 on RPE/<70% HR max,  50-55 minutes, aerobic exercises/  muscle strength and flexibility |  | 95% attendance at exercise classes | data in forest plot |
| GDM/GH | Barakat et al., 2014, Spain, RCT (7) | E: 107 C: 93 | E:  31.6 ± 3.9 C:  31.5 ± 3.9 | not highly active (<4/week) | Objective, LTPA | Supervised physical conditioning program that included three 55- to 60-min sessions per week that began between 9 and 13 weeks of gestation and continued until the end of the third trimester (weeks 39-40) | 3/week,  55-60% age predicted HR max/  Borg: 12-13,  55-60 minutes, Walking- treadmill/  PFMT/  Stretching,  Aerobic Dance/Joint mobilization/  Balance exercises |  | >95% attendance at exercise classes | data in forest plot |
| GDM/GH/PE | Bisson et al., 2015, Canada, RCT (8) | E: 25 C: 25 | E:  30.5 ± 3.7 C:  31.0 ± 4.0 | OB  According to PPAQ  E: 243.4 ± 98.1 METs hr/wk;  C: 305.3 ± 174.5 METs hr/wk | Objective, LTPA | Supervised intervention starting at 15 weeks gestation. | 1-3/week,  70% HR max/  RPE:3-5, 90min/week, resistance or aerobic |  | 60% attended 50% of classes; 20% 80% of classes | data in forest plot |
| GDM/GH | Codero et al., 2015, Spain, RCT (9) | E: 101 C: 156 | E:  33.6 ± 4.1 C:  32.9 ± 4.5 | E:  83 (82.2%) active;  18 (17.8%) sedentary C:  113 (72.4%) active;  43 (27.6%) sedentary | Objective, LTPA | Supervised exercise starting between 10-14 weeks gestation. The PA program was carried out between weeks 10 and 14 to the end of the third trimester. | 3/week,  <60% HR max/  Borg: 12-14,  50-60 min, Walking- treadmill/  Swimming/  PFMT/  Resistance Training/Water Aerobics/  Stretching/  Aerobic Dance/  Joint mobilization/  Relaxation |  | >80% attendance at exercise classes (excluded those with<80%) | data in forest plot |
| GDM/GH/PE | Currie et al., 2014, Canada, Cohort (82) | 1749 Light: 580 Moderate: 584 Vigorous: 585 | 31 |  | Self-reported, total PA | The questionnaire completed at approximately the 20th week of pregnancy requested information regarding PA during the year before pregnancy and in the first 20 weeks of pregnancy. PA was assessed using the KPAS, an instrument that has been validated in a pregnant population. Participants were characterized into LPA, MPA and VPA but criteria not specified. | not reported, light/moderate/vigorous, duration not reported, various type |  |  | Narrative summary  **Frequencies**:  Light:  14(2.41%) GDM; 49(8.45%) PIH; 23(3.97%) PE Moderate:  15(2.57%) GDM; 28(4.79%) PIH;  21(3.6%) PE Vigorous:  7(1.2%) GDM;  29(4.96%) PIH; 15(2.56%) PE **GDM** Moderate Exercise KPAS score 1.50–<2.50 (sports/exercise)  OR 0.77 (95% CI 0.34-1.76) KPAS score 6.44–<7.97 (active living, household/caregiving, sports/exercise)  OR 1.08 (95% CI 0.50-2.32) Vigorous Exercise  KPAS score >2.50 (sports/exercise)  OR 0.62 (95% CI 0.27-1.44)  KPAS score >7.97 (active living, household/caregiving, sports/exercise)  OR 0.56 (95% CI 0.22-1.47) **Gestational Hypertension** Moderate Exercise  KPAS score 1.50–<2.50 (sports/exercise)  OR 0.82 (95% CI 0.50-1.35) KPAS score 6.44–<7.97 (active living, household/caregiving, sports/exercise)  OR 0.59 (95% CI 0.36-0.96) Vigorous Exercise  KPAS score >2.50 (sports/exercise)  OR 0.73 (95% CI 0.45-1.19) KPAS score >7.97 (active living, household/caregiving, sports/exercise)  OR 0.67 (95% CI 0.41-1.10) **Preeclampsia** Moderate Exercise KPAS score 1.50–<2.50 (sports/exercise)  OR 0.84 (95% CI 0.43-1.65) KPAS score 6.44–<7.97 (active living, household/caregiving, sports/exercise)  OR 1.08 (95% CI 0.58-2.00) Vigorous Exercise  KPAS score >2.50 (sports/exercise)  OR 0.83 (95% CI 0.44-1.59) KPAS score >7.97 (active living, household/caregiving, sports/exercise)  OR 0.83 (95% CI 0.42-1.65) |
| GH | Ferland et al., 2013, Canada, Cross-sectional (97) | Low exercise:  15 Medium exercise:  36 High exercise:  43 | Low Exercise: 27.7 (22.3 - 34.9) Medium exercise: 29.2 (23.4 - 42.1) High exercise: 29.5 (19.9 - 44.4) |  | Self-reported, total PA | Participants were divided into three groups according to their PA frequency: 0 to 1 time/month (reference); 2 to 4 times/month; > 4 times/month. | 0-1/month (reference group) 2-4/month 4+/month, intensity and duration not reported |  |  | data in forest plot |
| GDM | Hui et al., 2014, Canada, RCT (33) | E (NW): 30 E (OW): 27 C (NW): 27  C (OW): 29 | E: 31 ± 3 C: 29 ± 6 |  | Objective, LTPA | The exercise intervention period was from 20-26 gestational weeks to 36 gestational weeks. Participants kept a logbook on their exercise activities as a motivator for exercise. Attendance less than 3 times at the group exercise, showed no interest to exercise at home or no record of exercise in logbook were considered as withdraw from the study. | 3-5/week,  low-moderate intensity,  30-45 min, aerobic/  stretching/  strength exercise | nutrition | 100% (Attendance < 3 times at the group exercise, showing no interest to exercise at home or no record of exercise in logbook were considered as withdraw from the study) | data in forest plot |
| PE | Kasawara et al., 2013, Brazil, RCT (58) | E: 58 C: 58 | 18 and older | Sedentary, history of PE | Objective, LTPA | Supervised intervention starting at 12-20 weeks gestation. | 1/week,  HR >20% resting,  30 min, cycle ergometer/  stretching |  | 43.8% Attendance at supervised sessions once per week for the duration of the study (average 21 weeks). | data in forest plot |
| GDM/GH/PE | Kong et al., 2014, USA, RCT (10) | E: 18 C: 19 | 18-45 | OW/OB. Only women engaged in < 3 x 30 min /week of LTPA for the 6 months preceding enrollment were recruited. | Objective, total PA | Unsupervised intervention starting 12-15 weeks of pregnancy. | 7/week,  80+ steps/min (moderate) 10+min bouts, walking |  | 33.8% used treadmills provided (unclear for entire group): self-report | data in forest plot |
| GDM/GH/PE | McGiveron et al., 2015, UK, non-randomized intervention (67) | E: 89 C: 89 | E:  27.3 ± 5.5  C:  29.0 ± 5.8 | OB  (BMI>35) | Self-reported, LTPA | Counselling intervention; one of the intervention sessions focused on PA and included recommendations to increase light activities such as walking or swimming from 15 min of continuous activity three times per week to 30 min of continuous activity five times per week. | 3-5/week, intensity not reported,  15-30 min, walking/  swimming/  various | nutrition | women in the intervention group attended all intervention session (criteria to divide the women in the intervention / control group) | Narrative summary  Pregnancy complications reduced by 76% in women in intervention group; gestational hypertension reduced by 95%; preeclampsia reduced by 90%; no reduction in diabetes during pregnancy **GDM**  (Exercise Intervention)  OR 1.139 (95% CI 0.419-3.100) **Gestational Hypertension**  (Exercise Intervention)  OR 0.103 (95% CI 0.034-0.307) **Preeclampsia**  (Exercise Intervention)  OR 0.115 (95% CI 0.014-0.940) Reference group was non-intervention |
| GH | Murtezani et al., 2014, Kosovo, RCT (49) | E: 30 C: 33 | E:  26.9 + 4.7 C:  25.7 + 5.1 | Sedentary for the last 6 months. | Objective, LTPA | Supervised exercise starting between 14-20 weeks gestation. | 3/week,  Borg:12-14,  40-45 min,  Cycle ergometer/  Walking- treadmill/  Stretching/  Strength exercises/  abdominal exercises |  | 85%: attendance to exercise group | data in forest plot |
| GDM | Mustila et al., 2013, Finland, non-randomized intervention (65) | E: 96 C: 89 | E:  30.9 (29.7-32) C:  30.1 (29.0-31.2) | High risk of GDM | Self-reported, LTPA | During counselling intervention sessions the expectant mothers received information on suitable and sufficient exercise during pregnancy. They also participated in a brief session of muscle tone exercise that could be repeated at home. | 2+/week,  2.5 hr/week, resistance training/  aerobics | nutrition | 84/96 (87.5%) women attended first counselling session; 57/96 (59.4%) attending second counselling session | data in forest plot |
| GDM | Nobles et al., 2015, USA, RCT (11) | E: 124 C: 124 | 18-40 | High risk of GDM, not active prior to pregnancy | Self-reported, LTPA | Counselling intervention starting at a mean gestational age of 11.8 weeks. The overall goal of the exercise intervention was to encourage pregnant women to achieve the College’s guidelines for PA during pregnancy (30 + min of MVPA on most days of the week). Specific activities were self-selected and included dancing, walking, and yard work. Weekly goals were to increase time spent in MVPA by 10% to safely progress toward the overall activity goal. Participants were provided a digital pedometer as a motivational tool and an activity diary to encourage self-monitoring. | 4-7/week, moderate to vigorous,  30+ min, various PA |  | 62.1% of participants in the exercise group who met the College’s guidelines for PA during pregnancy | data in forest plot |
| GDM | Okido et al., 2015, Brazil, RCT (12) | E: 26 C: 33 | E:  23.4 ± 5.3 C:  23.4 ± 4.8 |  | Objective, LTPA | Supervised PFMT program starting at 18-20 weeks gestation. | 2-7/week, intensity not reported,  20 min,  PFMT |  | 84.6% attendance at supervised sessions | data in forest plot |
| GDM | Putnam, 2013, USA, Cohort (76) | E(L): 55  E(M): 77  E(V): 58 | E(L):  27.9 + 6.9 E(M):  28.4 + 5.1 E(V):  28.4 + 5.3 |  | Self-reported, total PA | Participants completed a validated questionnaire of their daily activity from which the average energy expenditure per day (kcal/day) was calculated. Participants were grouped, according to their energy expenditure and assessed for antepartum, intrapartum, and neonatal outcomes. | 7/day, <2,200kcal/d 2,201-3,000kcal/d >3,000kcal/d, duration and type not reported |  |  | data in forest plot |
| GDM | Rauh et al., 2013, Germany, cluster RCT (34) | E: 152 C: 83 | E:  30.8 ± 4.9 C:  32.2 ± 4.4 |  | Self-reported, LTPA | Counselling on diet, PA and gestational weight gain at 20 and 30 weeks gestation. | 4-7/week, moderate intensity, duration not reported, cycling/ walking/  swimming/  non weight bearing/  low impact endurance | nutrition | Attendance at BOTH counseling sessions | data in forest plot |
| GDM/GH | Ruiz et al., 2013, Spain, RCT (13) | E: 481 C: 481 | E:  31.6 ± 4 C:  31.9 ± 4 | Sedentary | Objective, LTPA | Supervised intervention beginning at 9 weeks gestation. A mean of 85 training sessions were planned for each participant in the event of no preterm delivery. The intervention met the recommendations of the American College of Obstetricians and Gynecologists and involved light- to moderate-intensity aerobic, resistance, and flexibility exercises. | 3/week,  <60% HR max/  Borg: 10-12,  50-55 min, resistance training/  aerobics/  stretching/  aerobic |  | 97% attendance at supervised exercise sessions | data in forest plot |
| GDM/GH/PE | Renault et al., 2014, Denmark, RCT (14) | E: 142  D+E: 142  C: 141 |  | OB  (BMI>30) | Objective, total PA | Counselling intervention for walking or walking plus dietary intervention. Participants received monthly text messages. The dietary intervention consisted of contact with a dietician every 2 weeks. Participants started intervention between 11 and 15 weeks gestation. | 7/week,  11000 steps/day, duration not reported,  walking | nutrition | 55% returned exercise log with step counts and weight at 13 weeks; and 56% at week 33. | data in forest plot |
| GDM/GH/PE | Tomic et al., 2013, Croatia, RCT (15) | E: 166 C: 168 | E:  28.9 C:  29.2 ± 3.2 |  | Objective, LTPA | Supervised exercise starting 6-8 weeks gestation. All sessions were supervised by an expert kinesiologist. | 3/week,  60-75% HR max,  50 min,  Aerobic exercise |  | 80% attendance at exercise sessions | data in forest plot |
| GDM/PE | White et al., 2014, USA, Cross-sectional (91) | E (RTAE): 95 E (AE):  132 C: 53 | E (RTAE): 29.0 ± 4.2 E (AE):  27.3 ± 5.4 C:  26.0 ± 5.7 |  | Self-reported | Participants were classified by exercise status into 3 groups: 1) women who performed both leisure-time resistance training and aerobic exercise (RTAE) during pregnancy, 2) women who performed only leisure-time aerobic exercise (AE) during pregnancy, and 3) women who performed no leisure-time exercise (NE) during pregnancy. | 1/week, resistance training intensity not reported, aerobic light intensity, resistance training 5 min, aerobic 5 min |  |  | data in forest plot |
| GDM/GH | Dale et al., 1982, USA, Cross-sectional (90) | E(prosp): 12 E(retros): 21  C: 11 |  | "all runners"; women who had experienced a pregnancy in the last 5 years and ran during pregnancy; women ran on average of 4 years; pre-pregnancy distance run was 18.7 miles per week with a range of 5 to 40 miles per week | Self-reported, LTPA | Actual: Exercise: (retrospective - running) - mean 1T = 14.2 miles per week; 2T, 10.9 mpw; 3T, 6.6mpw; 8 of 21 (38%) competed in races during pregnancy; races were from 2 to 6.2 miles; racing speeds ranged from 7.05 min per mile to 10 min per mile; races completed between 2.5 and 8 months of pregnancy. Exercise: (prospective - running) - 13 mpw 1T; 12.9 mpw 2T; 9.2mpw 3T; training speeds = 9 mins per mile to 12 min per mile during pregnancy; 4 of 11 runners competed in races during pregnancy | FIT not reported, running |  |  | data in forest plot |
| GDM/GH/PE | Koivusalo et al., 2016, Finland, RCT (35) | E: 155  C: 138 | E:  32.3 ± 4.9 C:  32.6 ± 4.5 | A history of GDM and/or OB  (BMI >30) | Self-reported, LTPA | Unsupervised counselling intervention beginning <20 weeks gestation. An individual exercise program was planned for each participant during the counseling visits. The program was modified during the follow-up when needed. Participants received pedometers as motivational tools. The recommendation was a minimum of 10 000 steps a day. The participants had possibility to attend guided exercise groups provided by the municipalities or got ticket to e.g. public swimming pools once a week free of charge. In case exercise goals were not met, the study subjects were instructed to book an appointment with the PA advisor. PA logbooks were used both as motivational and educational tools and as data collection instruments | 3-5x/week, moderate,  30-50 min, walking/  swimming | nutrition | Of the women in the exercise and control group, 26% and 23%, respectively, met the PA goal of 150 min/week in the second trimester, with no significant differences between the groups. | data in forest plot |
| GDM | Oostdam et al., 2012, Netherlands, RCT (16) | E: 62 C: 59 | E:  30.8 ± 5.2 C:  30.1 ± 4.5 | OW/OB  AND 1 of  1) hx of macrosomia  2) hx of GDM  or  3) 1st-grade relative w/ T2D | Objective, LTPA | Supervised exercise starting at 15 weeks gestation. The exercise sessions consisted of aerobic and strength exercises aimed to control blood glucose levels. The training intensity was carefully and individually controlled. All exercise sessions were completed under the guidance and supervision of a specifically trained physiotherapist. | 2/week,  various intensity,  60 min,  aerobics/  strength |  | 16% attended 50% of classes | data in forest plot |
| GH | Perales et al., 2015, Spain, RCT (50) | E: 38 C: 25 | 31.9 ± 3.2 | Sedentary (exercising < 30 min, 3x per week) | Objective, LTPA | Supervised starting at 9-12 weeks gestation, which lasted from the beginning of the pregnancy (weeks 9–12) until the end of the third trimester (weeks 38–40). Therefore, an average of 85 training sessions was planned. Some specific exercises were then performed to increase muscle strength, to improve balance and to prevent some muscle imbalances that are common among pregnant women. | 3/week,  55-60% HR max,  55-60 min,  PFMT/  Stretching/  Aerobic Dance/Muscle Conditioning |  | >80% attendance to exercise sessions | data in forest plot |
| GDM/PE | Poston et al., 2015, UK, RCT (36) | E:  783  C:  772 | E:  30.5 ± 5.5 C:  30.4 ± 5.6 | OB | Self-reported, total PA | Supervised intervention starting 15-18 weeks gestation. | 7/week,  intensity not reported,  60 min,  yoga/walking, walking:  420 min/week MET:  1836 min/week M-V:  30 min/week | nutrition | 17% attended  < 50% of health trainer-led sessions or by telephone/  email session (<4 out of 8 sessions) | data in forest plot |
| GDM/GH/PE | Seneviratne et al., 2015, New Zealand, RCT (17) | E: 37  C: 37 | 18-40 | OW/OB  (BMI >25) | Objective, LTPA | Intervention: 67 total sessions. Intervention started at 20 weeks gestation and continued for 16 weeks | 3-5/week,  40-59% VO2 reserve,  15-30 min,  cycle ergometer |  | 33% completed > 54% (>30 of the 67) of the prescribed sessions. | data in forest plot |
| GH | McAuley et al., 2005, Canada, RCT (54) | E: 14 C: 14 | E:  28.9 + 0.8 C:  30.9 + 0.9 | no regular participation in strenuous occupational or recreational PA (>2 days/week) | Objective, LTPA | Supervised exercise starting 15-17 weeks gestation. The E group participated in both aerobic and muscle conditioning, whereas the C group performed only muscle conditioning in accordance with guidelines from the Society of Obstetricians and Gynecologists of Canada (SOGC) and the Canadian Society for Exercise Physiology. | 1+/week,  maternal HR <110,  20-30 min, walking/  stair machines/  muscle conditioning |  | exercise log kept by the instructor: TM2:  3.0 ± 0.1 sessions/  week  TM3:  2.7 ± 0.1 sessions/ week. Recommendations:  2 sessions/ week | Narrative summary  E group : 2 GH cases  C group: 2 GH cases |
| GH | Hollingsworth et al., 1987, USA, RCT (55) | E: 12  E(D): 13  C: 8  C(D):21 |  | Type I Diabetes | Objective, LTPA | Intervention: walk 20 min after each meal Control: no activity instruction. The mean gestational age on entry into the program was 12.7 ± 7 weeks for E(D) group vs. 12.3 ± 3 weeks for C(D). The duration of the study for E(D) was 24 ± 4 weeks and for C(D) it was 22 ± 6 weeks | 7/week, intensity not reported,  20 min,  walking | nutrition | Not reported | data in forest plot |
| GDM/PE | Badon et al., 2016, (77) Sweden, Cohort (Also linked to (107) and (108)) | All: 3310 | 18+ | 92% active pre-pregnancy;  75% active early pregnancy | Self-reported, total PA | Interview questionnaires contained items about recreational PA before and during pregnancy. Specifically, participants were asked the following questions to assess pre-pregnancy recreational activity: 1) ‘‘During the year before you became pregnant, what sports or recreation have you actively participated in?’’ For each activity, 2) ‘‘Which activity did you participate in on a regular basis during the year before you became pregnant?’’ 3) ‘‘How many times per week?’’ 4) ‘‘How many months did you regularly participate in this activity?’’ 5) ‘‘How much time did you spend at the activity per episode?’’. To assess perceived exertion, we asked, ‘‘During the year before you became pregnant, when you were exercising in your usual fashion, how would you rate your level of exertion?’’ Women selected a score on the basis of the Borg scale, which was displayed for them during the interview. | Frequency not reported,  Borg: 0-4/5-6/7-10, None Low (0.01-2.49 hr/week) Moderate (2.5-7.00 hr/week) High (7.00+hr/week,  various PA |  |  | data in forest plot  Narrative summary  **GDM**  **LTPA Early Pregnancy**  LTPA (0.01 - 11.2 MET hrs/wk):  OR 0.83 (95% CI 0.56,1.22)  LTPA (11.3 - 24 METhrs/wk):  OR 0.74 (95% CI 0.49,1.12)  LTPA (24.1 - 220 METhrs/wk):  OR 0.53 (95% CI 0.33,0.86)  LTPA duration (per tertile):  OR 0.82 (95% CI 0.71,0.95)  LTPA (0.01 - 2.66hrs/wk):  OR 0.82 (95% CI 0.55,1.21)  LTPA (2.67 - 5.50hrs/wk):  OR 0.70 (95% CI 0.46,1.06)  LTPA (5.51 - 35hrs/wk):  OR 0.58 (95% CI 0.36,0.93)  **Pre-Eclampsia**  **LTPA Early Pregnancy**  LTPA (<2.5hrs/wk):  OR 1.23 (95% CI 0.72,2.08)  LTPA (2.5-7hrs/wk):  OR 0.95 (95% CI 0.52,1.75)  LTPA (7+hrs/wk):  OR 0.96 (95% CI 0.52,1.76)  Vigorous ( >31.5 METhr/wk):  OR 0.96 (95% CI 0.52,1.75)  Moderate (11.25-31.5 METhr/wk):  OR 0.89 (95% CI 0.51,1.56)  Low (0.01-11.24 METhr/wk):  OR 1.44 (95% CI 0.83,2.53)  PA early pregnancy but not pre-pregnancy:  OR 2.03 (95% CI 0.71,5.81) |
| GDM | Li et al., 2014, China, Cross-sectional (86) | GDM:  69 Healthy: 470 | GDM:  29.5 + 4.2 No GDM:  28.3 + 4.0 | GDM | Self-reported, total PA | The PA of all women was evaluated with the International Physical Activity Questionnaire (IPAQ). The following values were used for analysis of the IPAQ data: walking at work = 3.3 MET; cycling for transportation = 6.0 MET; moderate yard work = 4.0 MET; and vigorous intensity in leisure = 8.0 MET. Three categorical scores were arbitrarily defined: low (<600 MET-min/week), middle (600–1500 MET-min/week) and high (1500+ MET-min/week). | Frequency and intensity not reported,  Low (<600 MET-min/week);  Middle (600–1500 MET-min/week); High (1500+ MET-min/week,  various PA |  |  | Narrative summary  Average MET-min/week at 24-28wks  GDM women (833.52±384.64)  Non GDM women 966.31±455.92) p=0.02.  OR 0.999 (95% CI 0.990-1.000). |
| GDM | Oken et al., 2006, USA, Cross-sectional (88) | 1,805 | 14-44 | GDM | Self-reported, total PA |  |  |  |  | data in forest plot  Narrative summary  GDM  Walking > 1 hrs/wk:  OR 0.67(95% CI 0.35,1.30)  Moderate /Light Exercise (any): OR 0.70 (95% CI 0.41,1.21)  Vigorous Exercise (any):  OR 0.90(95% CI 0.47,1.70)  Light/Moderate/Vigorous Exercise (any):  OR 0.73(95% CI 0.43,1.25) |
| GDM | Dempsey et al., 2004, USA, Case Control (92) | GDM:  155 Con:  386 |  | GDM | Self-reported, LTPA | Less than 6h per week; more than 6h per week. |  |  |  | data in forest plot |
| PE | Kordi et al., 2013, Iran, RCT (59) | E: 35 C: 35 | E:  26.5 ± 5.4 C:  25.5 ± 5.6 |  | Self-reported, LTPA | Unsupervised exercise starting 20-32 weeks gestation. Exercises were designed to strengthen the pelvic girdle muscles. The subjects in the exercise group were asked to perform following exercise programs; 1) aerobic exercises: brisk walking 2) Stretching exercises: performing hamstring, inner thigh, side waist, quadriceps and back stretch for 3 times per week. 3) Strengthening exercises: a program including forward bending, back pressing, diagonal curling, upper body bending, leg lift crawling along with Kegel exercise and pelvic tilt was given to the patients. Control group received general information about posture. | 3/week,  64-76% HR max,  >25 min, aerobics/  stretching/  muscle conditioning |  | Not reported | data in forest plot |
| GDM | Momeni Javid et al., 2015, Iran, Cross-sectional (87) | GDM:  100 Healthy: 100 | GDM:  28.7 + 3.9 Healthy:  27.8 + 4.6 | GDM | Self-reported, total PA | PA was assessed using Pregnancy Physical Activity Questionnaire (PPAQ), in which type of activity is divided into three groups of exercise, activity at home, and in leisure time, in the number of hours per day and per week. Intensity of PA was measured in Metabolic Equivalent Test (MET). Activity rate, based on type of activity, is the sum of intensity per day or per week. Activity with MET value less than 1.5 is considered sedentary, between 1.5 and less than 3 is considered light, between 3 and 6 moderate and more than 6 intense. | not reported, Sedentary:  leisure activity (<1.5MET) Light Activity: home activity (1.5-<3MET) Moderate activity: exercise (3-6), duration not reported,  various PA |  |  | GDM before 28wks, total PA  OR 0.98 (95% CI 0.956-1.013) GDM after 28wks, Aquatic Gymnastics  OR 0.71 (95% CI 0.111-4.580).  Physical Activity(MET)  Sedentary activity(<1.5) non GDM: 5.64(2.712); GDM: 4.70(3.747),  p= 0.223  Light activity (1.5-<3) non GDM: 9.07(5.524); GDM: 10.75(6.886), p=0.059  Moderate activity (3-6) non GDM: 4.62(7.520); GDM: 5.69(4.469), p=0.042 |
| GDM/GH/PE | Vollebregt et al., 2010, Netherlands, Cohort (78) | E(L): 1502 E(M): 1322 E(H): 321 C: 454 | 29.9 ± 5.1 |  | Self-reported, LTPA | LTPA in the past week was asked for by using four questions about walking, cycling, playing sports and other activities like ‘do it yourself’ or gardening in leisure time. The amount of time spent in minutes and the intensity (low, moderate or vigorous) was also asked for. Based on a numerical score that took into account the amount of time and intensity spent on each activity: no PA 0th percentile; low PA <50th percentile; moderate PA 50th-90th percentile; high PA >90th percentile | Frequency and duration not reported,  low-vigorous intensity, walking/cycling/playing sports/leisure time |  |  | data in forest plot  Narrative summary  **Pre-Eclampsia**  Sports (1-70min/wk):  OR 1.18 (95% CI 0.72-1.95)  Sports (71-180min/wk): OR 0.87 (95% CI 0.54-1.75)  Sports (180+min/wk):  OR 1.32 (95% CI 0.46-3.76)  Sports (low: <50th percentile):  OR 1.06 (95% CI 0.63-1.77)  Sports (mod: 50-90th percentile):  OR 1.22 (95% CI 0.75-2.10)  Sports (vig: 90th percentile):  OR 0.93 (95% CI 0.29-3.03)  Total LTPA (1-235min/wk):  OR 0.92 (95% CI 0.53-1.60)  Total LTPA (236-585min/wk):  OR 0.90 (95% CI 0.50-1.64)  Total LTPA (585+min/wk):  OR 0.88 (95% CI 0.37-2.11)  Total LTPA (low: <50th percentile):  OR 0.85 (95% CI 0.48-1.51)  Total LTPA (mod: 50-90th percentile):  OR 1.04 (95% CI 0.59-1.85)  Total LTPA (vig: 90th percentile):  OR 0.62 (95% CI 0.25-1.53)  **Gestational Hypertension**  Sports (1-70min/wk):  OR 0.91 (95% CI 0.55-1.49)  Sports (71-180min/wk): OR 1.40 (95% CI 0.89-2.22)  Sports (180+min/wk):  OR 0.86 (95% CI 0.27-2.80)  Sports (low: <50th percentile):  OR 1.03 (95% CI 0.64-1.65)  Sports (mod: 50-90th percentile):  OR 1.06 (95% CI 0.63-1.79)  Sports (vig: 90th percentile):  OR 1.75 (95% CI 0.79-3.90)  Total LTPA (1-235min/wk):  OR 1.27 (95% CI 0.75-2.15)  Total LTPA (236-585min/wk):  OR 1.00 (95% CI 0.56-1.77)  Total LTPA (585+min/wk):  OR 0.73 (95% CI 0.30-1.79)  Total LTPA (low: <50th percentile):  OR 1.26 (95% CI 0.74-2.16)  Total LTPA (mod: 50-90th percentile):  OR 0.97 (95% CI 0.51-1.51)  Total LTPA (vig: 90th percentile):  OR 1.12 (95% CI 0.53-2.34)  No sports or LTPA = reference |
| GDM | Jing et al., 2015, China, RCT (37) | E: 131  C: 131 | E:  29.6 ± 4.1 C:  29.9 ± 3.9 |  | Objective, LTPA | Counselling intervention (3 times) starting at 12 weeks gestation). 1) Resting (MET < 1.0); 2) mild PA (MET 1.0–2.9); 3) moderate PA (MET 3.0–6.0); and 4) intense PA (MET >6.0). | FITT not reported | nutrition | Only women who completed whole study were included in analyses | data in forest plot |
| PE | Korpi-Hyovalti et al., 2012, Finland, RCT (61) | E: 27  C: 27 | E:  29.1 ± 5.4 C:  29.8 ± 4.4 | High risk of GDM;  previously sedentary or OB | Self-reported, LTPA | Six counselling sessions (including 2 supervised exercise) beginning at 8-13 weeks gestation. Intervention: "aerobic activity; brisk walking, Nordic walking, swimming, cycling and cross country skiing. Women previously sedentary or with obesity instructed to begin at 15 min of continuous exercise 3 x per week, increasing to 30 min sessions 4 x per week; If she exercised <2.5 hours/week her goal was 30 min of daily; if she exercised 2.5 h/week or more goal was 45 min of daily activity. | 3-4x/week,  65-75% HR max,  15-30 min, aerobic/  walking/  swimming/  cycling/  cross-country/  skiing | nutrition | On average, the women in the intervention group met recommendations in recreational activity 5–7 and 3.5 h / week up to gestational week 25 and in the close follow-up group up to gestational week 30 | data in forest plot |
| GH/PE | Marcoux et al., 1989, Canada, Case Control (100) | PE:  172 GDM:  254 Healthy: 505 | PE:  26.0 + 4.8  GDM:  26.2 + 4.3 Healthy:  26.1 + 4.2 | PE; GDM | Self-reported, total PA | Activities were considered light (<4 kcal/min), moderate (4 1-5.9 kcal/min) or heavy (> 6-0 kcal/min) light-walking for pleasure, bicycling, canoeing or rowing for pleasure; moderate brisk walking, golf, home exercises, dancing, gardening; heavy-swimming, tennis, jogging, aerobics. The maximal intensity of LTPA performed by a subject was determined by the intensity level of the activity with the highest intensity code. Weekly energy expenditure in LTPA was obtained by multiplying the intensity code of each activity by its average duration (min/week), and by adding up all activities reported. Weekly energy expenditure in LTPA was categorized into low (no reported LTPA), moderate (1-840 kcal/week) and high (841 kcal/week or more). The cut off point for the last category corresponds to the median value of energy expenditure among active controls. | Frequency not reported,  Light: <4kcal/min Moderate:  4.1-5.9kcal/min Heavy: >6.0kcal/min, Time spent in LTPA 0 hrs/week, <4 hrs/week, 4+ hrs/week, various PA |  |  | data in forest plot  Narrative summary  **Pre-Eclampsia**  Some LTPA during the first 20 weeks of pregnancy:  OR 0.67 (95% CI 0.46-0.96)  Max Intensity LTPA (Light; <4kcal/min):  OR 0.82 (95% CI 0.53-1.29)  Max Intensity LTPA (Mod; 4.1-5.9kcal/min): OR 0.71 (95% CI 0.40-1.28)  Max Intensity LTPA (Heavy: 6+kcal/min):  OR 0.53 (95% CI 0.34-0.84)  EE in LTPA (Mod;1-840kcal/wk):  OR 0.77 (95% CI 0.50-1.16)  EE in LTPA (High; 841+kcal/wk):  OR 0.57 (95% CI 0.37-0.89)  **Gestational Hypertension**  Some LTPA during the first 20 weeks of pregnancy:  OR 0.75 (95% CI 0.54-1.05)  Max Intensity LTPA (Light; <4kcal/min):  OR 0.79 (95% CI 0.54-1.25)  Max Intensity LTPA (Mod; 4.1-5.9kcal/min): OR 0.74 (95% CI 0.43-1.25)  Max Intensity LTPA (Heavy: 6+kcal/min):  OR 0.73 (95% CI 0.50-1.09)  EE in LTPA (Mod;1-840kcal/wk):  OR 0.80 (95% CI 0.55-1.17)  EE in LTPA (High; 841+kcal/wk):  OR 0.71 (95% CI 0.48-1.04) |
| GH/PE | Haakstad et al., 2011, Norway, RCT (51) | E: 52 C: 53 | E:  31.2 ± 3.7 C:  30.3 ± 4.4 | Pre-pregnancy exercise levels did not include participation in a structured exercise program >60 min once per week or brisk walking >120 min per week for the past 6 months. | Objective, LTPA | 12-week exercise program including 60 min of supervised aerobic dance performed at least twice a week. The aerobic dance routine included low-impact exercises and step-training. Control group maintained usual activity levels | 2+/week, moderate intensity/  BORG 12-14,  60 min,  aerobic dance |  | 17.0+12.5 out of 24 prescribed  exercise sessions, ( 21 women (40%) attended  80% or more of recommended exercise sessions | data in forest plot |
| GH | Avery et al., 1997, USA, RCT (56) | E: 16 C: 176 | E:  32.2 ± 4.9 C:  30.4 ± 5.1 | GDM; inactive (no current regular exercise regimen for continuous 30 min periods more than 2x/week). | Objective, LTPA | Supervised beginning after diagnosis of GDM (<34 weeks gestation). | 3-4/week,  70% HR max,  30 min,  cycle ergometer | nutrition | not reported | data in forest plot |
| GDM/GH | Harris et al., 2015, USA, Cohort (79) | E: 345 C: 611 |  |  | Self-reported, LTPA | Each respondent was asked, ‘‘thinking back to 3 months before you found out you were pregnant, did you exercise or play sports at least 3 times a week? For those women who reported ‘‘yes’’ on the question, the number of months she engaged in exercises/sports at least three times a week and the specific type of exercise that she did during pregnancy was asked. Exercise group = exercised 3 times or more per week. | 3+/week,  intensity and duration not reported,  various PA |  |  | data in forest plot |
| GH | Snapp et al., 2008, USA, Case Control (101) | E: 29,480 C: 45,680 |  | GDM | Self-reported, LTPA | The participants of the exercise study are a subset of the GDM group who met the additional criteria of a single gestation, pregnancy duration 37 weeks, delivery of a live full-term infant, and no prescribed bed rest during the pregnancy. Participants identified their LTPA behavior during their GDM pregnancy as part of the maternal questionnaire that queried specific type and the number of months that they participated in PA during pregnancy. Physical exercise for 6 or more months of pregnancy was chosen to ensure the participants participated in PA for the majority of the pregnancy. | 3+/week,  intensity not reported,  >30 min,  various PA |  |  | data in forest plot |
| GDM/GH | Petrella et al., 2014, Italy, RCT (38) | E: 33 C: 28 | E:  31.5 ± 4.2 C:  32.4 ± 5.9 | OW/OB | Self-reported/objective, LTPA | Counselling intervention beginning at 12 weeks gestation. The exercise intervention was focused on developing a more active lifestyle. The recommended exercise prescription for pregnant women is generally consistent with recommendations for the general population. Subjects wore a pedometer. | 3/week, intensity gauged by talk test,  30 min,  walking | nutrition | Not reported | data in forest plot |
| GDM | Iqbal et al., 2007, Pakistan, Cohort (83) | GDM:  49 No GDM: 563 | GDM:  29.5 + 4.7  No GDM:  26.4 + 4.3 | GDM | Self-reported, total PA | PA level was measured by an interviewer administered PA questionnaire. This questionnaire measures time and energy spent in a range of PA including occupational work, transportation, household chores as well as LTP over a 1-year period. |  |  |  | Narrative summary  PA (per 100 kcal increase)  OR 0.89 (95% CI 0.79-0.99) |
| GDM/GH/PE | Ussher et al., 2015, UK, RCT (18) | E: 383  C: 389 | E:  27.2 ± 6.1 C:  27.8 ± 6.5 | Smokers | Objective, LTPA | Supervised intervention starting 10-24 weeks gestation. All women were smokers. Fourteen sessions of supervised exercise were offered over eight weeks. Immediately before each treadmill session, the women received behavioural support. At the first two treadmill sessions, and then on every other occasion (total of nine consultations), this support aimed to identify opportunities to incorporate PA into women’s lives, to motivate them to use PA to reduce the urge to smoke, and to help them use behavioural strategies to improve adherence to these plans. These 20 minute consultations incorporated 19 behaviour change techniques, as described in the study protocol.15 The women were advised to be active for at least 10 minutes at a time, progressing towards 30 minutes of activity on at least five days a week. The emphasis was on brisk walking, and pedometers were supplied, with researchers setting individualized step count targets. | 5x/week - unsupervised, moderate intensity,  10-30 min,  brisk walking |  | By self-report, 70% were achieving the recommendation of 150 min of MVPA/week (in bouts of ≥10 min). | data in forest plot |
| GDM | Harizopoulou et al., 2010, Greece, Case Control (93) | GDM:  40 No GDM: 120 | GDM:  33.8 ± 4.5  No GDM:  32.7 ± 3.4 | Complicated: 83% inactive, 17% minimally active,  0% HEPA (health enhancing PA) active Healthy:  22% inactive, 52% minimally active,  26% HEPA (health enhancing PA) active | Self-reported, total PA | GDM group was divided in three subgroups : inactive, minimally active and HEPA during early pregnancy. Control cases were divided in three groups: inactive, minimally active, HEPA. Women categorized as ‘‘inactive’’ did not meet the criteria for the other categories. Women categorized as ‘‘minimally active’’ had 3+ days / week of vigorous-intensity PA (at least 20 min per day) or 5+ day/ week of MVPA and/or walking (at least 30 min per day) or 5+ day/ week of any combination of walking, moderate-intensity or vigorous-intensity PA (achieving a minimum total PA of at least 600 MET-min/week). Finally, women categorized as ‘‘HEPA active’’ had 3+ days/week of vigorous-intensity PA (achieving a minimum total PA of at least 1,500 MET-min/week) or 7+ days / week of any combination of walking, moderate-intensity or vigorous-intensity PA (achieving a minimum total PA of at least 3,000 MET-min/week) | Inactive Minimally Active HEPA active, intensity not reported, Minimally active:  600 MET min/week HEPA active: 1500-3000 MET min/week |  |  | data in forest plot |
| GDM | Morkrid et al., 2014, Norway, Cohort (84) | Healthy: 520 GDM: 239 | 29.9 | Healthy:  43% (214/520) reported PA > 150 min per week;  56% (283/520) reported not regular PA pre-pregnancy  GDM:  32% (74/239) reported regular PA >150 min per week pre-pregnancy;  70% (163-239) reported not regular PA pre-pregnancy | Objective, LTPA | Information about self-reported PA was collected with a questionnaire. A self-reported regular PA history before pregnancy was reported with the response categories: “never,” “<1 year,” “1–5 years,” “6–10 years,” and “>10 years.” The total number of minutes of self-reported aerobic PA/week (all PA modes) three months before pregnancy and in early gestation were calculated separately. PA was characterized as light-intensity PA [1.5 to <3 metabolic equivalents (METs)], moderate-intensity PA (3–6 METs), and vigorous-intensity PA (>6 METs). | 3+/week, moderate to vigorous intensity,  >20 min, running/  bicycling/  aerobic classes/dancing/  ball games/  swimming/  brisk walking |  | Healthy: 17/520 self-reported PA >150 min/week during pregnancy GDM: 24/239 self-reported >150 min PA per week during pregnancy | Narrative summary  MVPA  OR 1.02 (95% CI 0.85-1.23. OR for a 1 SD) Steps/Day  OR 0.81 (95% CI 0.66-0.99. OR for a 1 SD) |
| GDM | Harrison et al., 2013, Australia, RCT (39) | E: 121 C: 107 | E:  32.4 ± 4.6 C:  31.7 ± 4.5 | OW/OB | Objective, LTPA | Counselling intervention starting 14-16 weeks gestation. Women in the intervention group participated in four, 45 minute individual behaviour change lifestyle sessions at 14–16, 20, 24 and 28 weeks gestation. Pedometer was used to assess the number of free-living steps per day | FITT not reported | nutrition | 89-95%: "Attendance at intervention counselling sessions; 100% session 1; 95% session 2; 89% session 3; 93% session 4 | data in forest plot |
| GH | Pelaez et al., 2014, Spain, RCT (52) | E: 73 C: 98 | E:  29.9 ± 3.3 C:  29.1 ± 4.5 | E:  Pre-pregnancy PA:  active 29(46.8%); inactive 33(53.2%) C:  pre-pregnancy PA:  active  33 (37.1%);  inactive 56 (62.9%); | Self-reported, LTPA | Supervised exercise started between 10-14 weeks gestation. To increase motivation and abilities, we used different exercises, positions and sometimes music to follow the beat. Women were encouraged to perform 100 contractions distributed in different sets every day. Program of at least 22 weeks, 3 sessions per week. Prescribed number of sessions: 70-78. | Total sessions:  56-62 3/week,  165-180 HRmax/  RPE: 12-14,  55-60 min,  PFMT/  Strength exercises/  aerobic training |  | >80% attendance to exercise session | data in forest plot |
| GDM | Chasan-Taber et al., 2008, USA, Cohort (80) | All: 1,006 | 16-40 | median (25-75 percentile)  1.25 (1.25-.175) Sports/exercise modified KPAS | Self-reported, total PA | PA was assessed in early pregnancy (mean 15 weeks gestation) and mid-pregnancy (mean 28 weeks gestation) via a modified version of the KPAS designed specifically to assess PA in women and validated for use during pregnancy. 13.1% meet ACOG guidelines; 86.9 do not meet ACOG guidelines at the time of recruitment | Frequency not reported,  Q(I): 1.3 Q(II): 1.5 Q(III): 2.8 Q(IV): 4.0 medians,  duration not reported,  sports and exercise |  |  | Narrative summary  **GDM**  **PA Early pregnancy**  Lower quartile S&E (1.3)  OR 1.5 (95% CI 0.5-4.5) Middle quartile of S&E (1.5)  OR 0.9 (95% CI 0.3-2.9) Highest quartile S&E (2.3)  OR 0.7 (95% CI 0.2-2.5) **PA Mid-pregnancy**  Lowest quartile of S&E (1.3)  OR 0.4 (95% CI 0.1-1.4) Middle quartile of S&E (1.5)  OR 1.3 (95% CI 0.5-3.7) Highest quartile of S&E (2.5)  OR 0.1 (95% CI 0.0-0.7) |
| GH | Martin et al., 2010, USA, Cross-sectional (99) | Complicated:  421 Healthy:  2927 | 18-44 | Complicated Pregnancy | Self-reported, total PA | PA during pregnancy was determined based on responses to the following question: ‘‘During the last 3 months of your most recent pregnancy, how often did you participate in any PA or exercise for 30 min or more?’’ Women who indicated PA of 1 to 4 days or more than 5 days per week were considered to be physically active, whereas women who reported less than 1 day per week of PA were considered to be physically inactive. The ‘‘none’’ group consisted of women who were physically inactive both before and during pregnancy (i.e., the referent group). | 1-4/week; 5+/week,  intensity and duration not reported,  various PA |  |  | Narrative summary  Complicated:  26(7.5%) GDM Healthy:  86(2.3%) GDM Hypertensive Complications  Exercise (<1day/wk): reference Exercise (1-4days/wk)  OR 0.59 (95% CI 0.42-0.82)  Exercise (5+days/wk)  OR 0.41 (95% CI 0.18-0.92) Exercise (combined PA)  OR 0.51 (95% CI 0.24-1.05) |
| GDM | Ko et al., 2014, USA, RCT (19) | E: 591 C: 605 | E:  26.0 ± 4.8 C:  26.0 ± 4.7 | E:  31.1 ± 35.1 MET-hrs per week;  mild  1.4 ± 2.0 hr/wk, moderate  1.8 ± 2.0 hr/wk,  strenuous  2.0 ± 3.5 hr/wk C:  30.9 ± 28.7 MET-hrs per week;  mild  1.4 ± 1.9 hr/wk,  moderate  1.7 ± 1.9 hr/wk, strenuous  2.0 ± 2.8 hr/wk | Objective, LTPA | Counselling intervention starting before 20 weeks gestation. The intervention was an exercise program of MVPA. Participants in the exercise intervention arm were taught exercise techniques in structured supervised sessions with the exercise interventionist. | 3-5/week, moderate to vigorous,  30-60 min, aerobics, resistance training |  | Not reported | data in forest plot |
| GDM/GH/PE | Chasan-Taber et al., USA, 2015, Cohort (81) | All: 1,240 | 16-40 |  | Self-reported, total PA | Due to low participation in vigorous activity during pregnancy, this variable was dichotomized as yes/no. In addition, women with 47.5 MET-h/week in sports/ exercise activities of moderate-intensity or greater (i.e. 30 m per day of activity at 3 METs multiplied by 5 days/week) were considered to have met the ACOG exercise guidelines. | FITT not reported |  |  | Narrative summary  **GDM** **PA early pregnancy** NOT meeting ACOG PA Guidelines  OR 0.93 (95% CI 0.46-1.88) High Activity (total PA; 4th quartile)  OR 0.72( 95% CI 0.28-1.83) High Activity (sport & exercise; 4th quartile)  OR 1.05 (95% CI 0.45-2.42) **PA mid-pregnancy** NOT meeting ACOG PA Guidelines  OR 1.08 (95% CI 0.5-2.32) High Activity (total PA; 4th quartile)  OR 1.25 ( 95% CI 0.38-4.07) High Activity (sport & exercise; 4th quartile)  OR 0.87 (95% CI 0.34-2.24) **Preeclampsia** **PA early pregnancy**  NOT meeting ACOG PA Guidelines  OR 0.8 (95% CI 0.3-1.7) High Activity (total PA; 3rd quartile)  OR 0.6 (95% CI 0.2-1.9) High Activity (sport & exercise; 3rd quartile)  OR 1.5 (95% CI 0.6-3.5) **Gestational Hypertension; Pre-Eclampsia** **PA early pregnancy**  NOT meeting ACOG PA Guidelines  OR 0.9 (95% CI 0.5-1.9) High Activity (total PA; 3rd quartile)  OR 0.6 (95% CI 0.3-1.5)  High Activity (sport & exercise; 3rd quartile)  OR 1.1 (95% CI 0.5-2.2) Active during early pregnancy only  OR 0.6 (95% CI 0.1-2.6) |
| GH/PE | Haelterman et al., 2007, Canada, Case Control (102) | E: 344 C: 3,578 |  | PE and GH | Self-reported, LTPA/total PA | Exercisers participated in vigorous leisure-time PA during the first trimester more than 2x / week. Controls were less than once per month. |  |  |  | data in forest plot |
| GDM | Liu et al., 2015, USA, non-randomized intervention (64) | E: 16 C: 38 | E:  25.1 ± 4.2 C:  27.4 ± 4.9 | OW/OB | Self-reported, LTPA | Behavioural modification program starting <18 weeks gestation (including diet and exercise). | 5+/week, moderate intensity,  30 min,  walking | nutrition | During pregnancy, participants attended an average of 3.8 group sessions plus 1.3 makeup sessions, thus receiving 64 % of the group session content. | data in forest plot |
| GDM | Callaway et al., 2010, Australia, RCT (20) | E: 25 C: 25 | E:  30.4 ± 4.8 C:  30.0 ± 5.9 | OB  (BMI>30) | Self-reported, total PA | Exercise counselling starting at 12 weeks gestation. Women scheduled for 6 face-to-face visits and on average attended 4 (66.7% attended): MET hr/week: measured at 36 weeks at end of intervention. Measured using the PPAQ. | not reported  E:  9.6 MET hr/week C:  2.8 MET hr/week Prescribed E: 900 kcal/week, duration not reported |  | E: 73% (16/22) met targets of >900 kcal per week at 28 weeks C: 42% (8/19) met targets of >900 kcal per week at 28 weeks | data in forest plot |
| GDM/GH/PE | Polley et al., 2002, USA, RCT (40) | E(NW):  32  E(OW/OB): 29  C (NW):  33  C(OW/OB)  26 | 25.5 ± 4.8 |  | Self-reported, total PA | Counselling intervention at antenatal visits about GWG, exercise and healthy eating during pregnancy starting at 12-20 weeks gestation. Intervention: Focus on increasing walking and developing a more active lifestyle delivered by master’s and doctoral level staff with training in nutrition or clinical psychology. | most/all days of the week,  intensity and duration not reported, walking/active lifestyle | nutrition | Due to GWG above the guidelines, the number of additional counselling sessions ranged from 1 to 11). | data in forest plot |
| GDM/GH/PE | Phelan et al., 2011, USA, RCT (41) | E: 201  C: 200 | E:  28.6±5.2  C:  28.8±5.2 | OW/OB | Objective, LTPA | Counselling intervention at antenatal visits about GWG, exercise and healthy eating during pregnancy starting at 12-20 weeks gestation. The intervention included one face-to-face visit with an interventionist at the onset of treatment who discussed appropriate weight gains during pregnancy, PA and calorie goals. Body-weight scales, food records, and pedometers were provided to promote adherence to daily self-monitoring. Automated postcards that prompted healthy eating and exercise habits were mailed weekly. In addition, after each clinic visit, women were sent personalized graphs of their weight gains with feedback. All women in the intervention received 3 brief (ie, 10–15 min) supportive phone calls from the dietitian during the intervention. Women who were over or under weight gain guidelines during any 1-mo interval received additional brief, supportive phone calls (2 calls/mo) that provided structured meal plans, and specific goals until weight gains returned to appropriate amounts. | most days, intensity not reported,  30 min,  walking | nutrition | Not reported | data in forest plot |
| PE | Magnus et al., 2008, Norway, Cohort (105) | PE:  2,315; Healthy: 57,258 |  |  | Self-reported, LTPA | Information on recreational PA was retrieved from Q1 in which participants were asked how often they engaged in 14 different recreational activities during the last 3 months before pregnancy and until 13–17 weeks in pregnancy. Only women who had answered both the question on recreational PA in the last 3 months before pregnancy and until week 17 in the actual pregnancy were included. Women were categorized into two categories: physically active (performing recreational PA at least once a week) and non-active (performing recreational PA less than once a week). | 1+/week,  intensity and duration not reported, recreational PA |  |  | data in forest plot  Narrative summary  **Preeclampsia**  **PrePreg BMI <25**  Low Activity (1-5 activities/month):  OR 0.85 (95% CI 0.71-1.01)  Low Activity (6-12 activities/month):  OR 0.80 (95% CI 0.67-0.96)  Moderate Activity (13-24 activities/month):  OR 0.77 (95% CI 0.63-0.93)  High Activty(25+activities/month):  OR 0.69 (95% CI 0.53-0.89)  **PrePreg BMI 25-29.9**  Low Activity (1-5 activities/month):  OR 1.0 (95% CI 0.81-1.23)  Low Activity (6-12 activities/month):  OR 0.94 (95% CI 0.75-1.17)  Moderate Activity (13-24 activities/month):  OR 0.99 (95% CI 0.77-1.27)  High Activty(25+activities/month):  OR 0.68 (95% CI 0.44-1.04)  **PrePreg BMI 30+**  Low Activity (1-5 activities/month):  OR 1.2 (95% CI 0.93-1.54)  Low Activity (6-12 activities/month):  OR 1.47 (95% CI 1.12-1.91)  Moderate Activity (13-24 activities/month):  OR 1.21 (95% CI 0.87-1.67)  High Activty(25+activities/month):  OR 1.39 (95% CI 0.83-2.32) |
| GH/PE | Sorensen et al., 2003, USA, Case Control (106) | Case:  201 Control: 383 |  | PE | Self-reported, LTPA | Energy expended performing PA (MET), h/wk: not active; <9.0; 9.0-15.9; 16.0-31.4; >31.5 |  |  |  | data in forest plot |
| GDM | Simmons et al., 2015, UK, Ireland, Netherlands, Belgium, Poland, Italy, Spain, Austria, Denmark, RCT (21) | HE: 50 HE + PA: 50 PA: 50 | HE:  31.1 + 6.0 HE + PA: 30.5 + 5.0 PA:  33.1 + 5.2 | OB  (BMI >29) | Objective, total PA | Counselling intervention starting before 20 weeks gestation. Participants were asked to wear the accelerometer from waking up until going to bed, attached to the right hip by an elastic waist belt, for at least 3 days. For analysis, the time spent in MVPA (min/day) and in sedentary behaviour (as proportion of total wear time) were used. | not reported, moderate to vigorous intensity, 1953 + counts/minute, various PA | nutrition | Not reported | data in forest plot |
| PIH | O'Connor et al., 2011, USA, non-randomized intervention (69) | 32 | 29 ± 4 | Women had back pain or a history of back pain. Intervention started between 21 and 25 weeks gestation. | Objective, LTPA | 2 sessions per week of muscle conditioning for 12 weeks. Walking- treadmill, Muscle Conditioning, Dual leg press and leg curls, Lumbar extension, Lat pull down, Leg extension | 2/week,  RPE: 10.5-12.9 low-moderate,  45 min/session, muscle conditioning |  | The attendance rate across 12 weeks was 81% (±11%). | Narrative summary  1(3.1%) PIH |
| GDM/PE | Dyck et al. 1999, Canada, non-randomized intervention (62) | 7 | 27 (median) | Hx diabetes. | Objective, LTPA | The exercise program consisted of 45-minute sessions 3 times each week and was supervised by a nurse, an Aboriginal facilitator and an exercise instructor. Each session included a 5 min warm up, 30 min of aerobic exercise and 10 min of cool down. Intensity was altered to keep the heart rate in the target zone. The "talk test" was used to avoid over-exertion | 3/week,  70% HR max,  45 min,  aerobic |  | Attendance range was 11% to 88% (median 43%) and 5/7 (71%) of women attended 40% or more of exercise sessions | Narrative summary  3 (43%) GDM  1 (14%) PE |
| GH/PE | Saftlas et al., 2004, USA, Cross-sectional (98) | Healthy: 2422 PE:  44 GDM:  172 | Healthy:  31.4 ±4.4 PE:  30.8 ±4.0 GDM:  30.5 ± 4.7 | Healthy: 1695 (70%) engaged in exercise or sports at least once per week for the 12 months before pregnancy PE: 30 (68.2%) engaged in exercise or sports at least once per week for the 12 months before pregnancy GDM: 124 (72.1%) engaged in exercise or sports at least once per week for the 12 months before pregnancy | Self-reported, LTPA | 1) sedentary work/no LTPA (referent category); 2) sedentary work/some LTPA; 3) non sedentary work/no LTPA; and 4) non sedentary work/ some LTPA. A second cross-stratification variable consisted of six levels, using the proportional sitting variable to represent work activity in place of the dichotomous variable for sedentary work: 1) least sitting/some LTPA; 2) least sitting/no LTPA; 3) moderate sitting/some LTPA; 4) moderate sitting/no LTPA; 5) highest sitting/some LTPA; and 6) highest sitting/no LTPA (referent group). | Frequency and duration not reported,  LTPA energy expenditure (calories/week) Least active: <800 Moderately active:  800-1749.9 Most active: 1750+ |  |  | data in forest plot |
| PE | Lombardi et al., 1999, USA, non-randomized interventions (70) | E: 211 C: 147 | E:  24.2 ± 4.5 C:  24.5 ± 4.3 |  | Objective, LTPA | Supervised intervention. Gestational age at study entry not specified. The thrice weekly fitness program consisted of 10 min warm up and stretch, 20 min muscular conditioning, 20 min cardio conditioning, and 10 min cool down and stretch. Educational class consisted of twice weekly hour long classes that covered a variety of pregnancy topics. | 3/week, intensity not reported,  60 min |  | Not reported | data in forest plot |
| GDM/GH/PE | Barakat et al., 2016, Spain, RCT (22) | E: 382 C: 383 | E:  31.6 ± 4.2 C:  31.8 ± 4.5 | E:  Active  N=61 (16.0%) C:  Active  N=70 (18.3%) | Objective, LTPA | The exercise group trained from weeks 9-11 of pregnancy, to the end of the third trimester (weeks 38-39). An average of 85 training sessions was originally planned for each participant in the event of no preterm delivery. The intervention involved aerobic exercise, aerobic dance, muscular strength, and flexibility, and met the standards of the American Congress of Obstetricians and Gynecologists. | 3/week,  <70% HR max/  BORG 12-14,  50-55 min, aerobic/  muscular/  flexibility |  | 90 ± 8% attendance to exercise sessions | data in forest plot |
| GDM/GH/PE | Dodd et al., 2014, Australia, RCT (42) | E: 1108 (DVD: 543; no DVD: 565) C: 1104 |  |  | Self-reported, LTPA | Women randomized to receive Lifestyle Advice participated in a comprehensive dietary and lifestyle intervention over the course of their pregnancy, which included a combination of dietary, PA and behavioural strategies, delivered by a research dietician and trained research assistants. | most days of the week,  low to moderate intensity,  30 min | nutrition | Not reported | data in forest plot |
| GDM/GH/PE | Garnaes et al., 2016, Norway, RCT (23) | E: 46  C: 45 | E:  31.3 ± 3.8 C:  31.4 ± 4.7 | BMI 28+, excluded for "habitual exercise training (2x or more) in the period before inclusion" | Objective, LTPA | E: Supervised exercise intervention starting at 12-18 weeks gestation, women were also asked to follow a home exercise program at least once weekly as well as daily PFM exercises. Reported activity in diary. Also received a weight tracking curve in accordance to IOM 2009 guidelines, also invited to attend one motivational interview session, either individually or in a group during intervention. C: Standard antenatal care | 3/week,  12-15 on RPE,  50 min,  walking/  running/  PFMT/  muscle conditioning/  endurance training |  | 50% fulfilled the training intervention defined as (1) attending 42 organized exercise sessions, (2) attending 28 exercise sessions + performing 28 home exercise sessions, or (3) performing 60 home exercise sessions. | data in forest plot |
| GDM | Leng et al., 2016, China, Cross-sectional (85) | Non GDM: 10,610 GDM:  840 | 28.5 ± 2.8 | GDM | Self-reported, LTPA | We categorized as ‘low’ when subjects reported 0–29min per day, and ‘moderate-to-high’ when subjects reported more than 30min per day. LTPA was classified into two categories: no LTPA/engaged in this activity <3h/week (low), for example, walking, jogging, swimming, ball games, and engaged in this activity ≥3h/week (moderate-to-high). PA during pregnancy were merged and regrouped into two categories based on the above four types of activities: ‘low’ when women reported the levels of all four types of activities were ‘low’ and ‘moderate-to-high’ when women reported at least one level of the four types of activities was ‘moderate-to-high’. | Frequency and intensity not reported,  Low:  0-29 min/day Moderate-High: 30+ min/day No LTPA: <3hr/week LTPA: 3+/week |  |  | Narrative summary  Moderate-High activity (LTPA > 3h / week, commuting to work by PA > 30 min per week, and house work consisting of more hard work such as farming)  OR 0.81 (95% CI 0.67-0.97)  Low activity (reference: LTPA < 3 hours / week, commuting to work by walking, biking taking 1-29 min, and house work) |
| GDM | Lindqvist et al., 2016, Sweden, Cross-sectional (89) | 3868 | 29.7 ± 4.9 | Almost half of the participants (47.1%) achieved the recommended level of PA. | Self-reported, LTPA | Pre-pregnancy and early pregnancy self-reported LTPA (included as a dependent variable) was based on the following question: “How often do you perform any kind of physical activity during leisure-time? Please have the last 12 months in mind when responding to the question”. There were three groups of PA levels: low (not breathless or sweaty), moderate (warm, possible to have a conversation), and vigorous (high pulse, breathless, and sweaty). The respondent assessed the number of days they were physically active on each level. To calculate activity minutes, the reported number of days in the second group (moderate) was multiplied by 30 min and the third group (vigorous) was multiplied by 60 min. Group one (low) was defined as <150 min. Finally, the variable was dichotomized as <150 min (i.e., not achieving the recommended level) and ≥150 min (i.e., achieving the recommended level) during leisure time. | Frequency and intensity not duration,  <150 min/week 150+ min/ week |  |  | data in forest plot |
| GDM/PE | Sagedal et al., 2016, Norway, RCT (43) | E: 303  C: 303 | E:  27.9 ± 4.2 C:  28.1 ± 4.5 |  | Objective, LTPA | The PA component consisted of access to exercise classes at a local gym facility from randomization to delivery. Attendance was recorded. Participants were encouraged to be physically active at moderate intensity on additional days. Intervention began <20 weeks and continued until delivery/36 weeks. There was no intervention performed after delivery. | 2/week, moderate intensity,  60 min | nutrition | All received access to physical fitness classes and 274 (92.6%) attended at least one class. The number of classes attended varied between 0 and 38, with a median of 14. | data in forest plot |
| GDM | Smith et al., 2016, USA, RCT (44) | E: 26 C: 25 | E:  29.7 ± 4.1 C:  29.4 ± 4.9 | Only women with a history of participating in < 3 sessions of exercise for 30 min or more / week for at least 6 months before conception were enrolled. | Objective, total PA | Web-based behavioural intervention starting 10-14 weeks gestation. Participants were instructed to gradually work up to ≥150 min of moderate PA / week (in ≥10-min bouts) by week 19 gestation and sustain at least this amount until delivery. | Frequency not reported, moderate intensity, 150+/week 10+ min/bout | nutrition | -45% of women had at least 150 mins MVPA in at least 10-min bouts at 24-26 weeks  -25% of women had at least 150 min MVPA in at least 10-min bouts at 34-36 weeks | data in forest plot |
| GH/PE | Spracklen et al., 2016, USA, Case Control (103) | Healthy: 182  PE:  258 GH:  233 | Healthy:  26.4 ± 4.8 PE:  26.4 ± 4.8 GH:  26.4 ± 4.8 | PE and GH | Self-reported, LTPA | Developed PE:  LTPA min/week:  64 (24.8%) did 0;  99 (38.4%) did 1-75;  49 (19.0%) did 76-170  46 (17.8%) did ≥171 Developed GH:  LTPA min/week:  45 (19.3%) did 0;  94 (40.3%) did 1-75;  51 (21.9%) did 76-170  43 (18.5%) did ≥171 Healthy:  LTPA min/week:  39 (21.4% )did 0;  52 (28.6%)did 1-75;  44 (24.2%) did 76-170  47 (25.8%) did ≥171 | Frequency and intensity not reported,  Duration (min/week)  0;  1-75;  76-170;  171+ |  |  | data in forest plot |
| GDM | Sun et al., 2016, China, non-randomized intervention (63) | E: 37  C: 37 | E:  30.8 + 3.1 C:  31.6 + 3.4 | OW  (BMI ≥24) | Self-reported, LTPA | The intervention group was provided with exercise, dietary, weight gain counseling and detailed plans at weeks 8–12 and every month in the second trimester | 3-4/week, moderate intensity,  15-45 min | nutrition | Not reported | data in forest plot |
| PE | Taniguchi et al., 2016, Japan, RCT (60) | E: 60  C: 58 | E:  28.5 ± 3.5 C:  29.5 ± 3.0 | Sedentary | Objective, LTPA | The participants in the walking group were instructed to walk briskly for 30 min, 3+/ week, from 30 weeks’ gestation until delivery, recording on a daily basis time spent walking (min), the number of steps at starting and finishing brisk walking and the difference between these values. | 3+/week, intensity not reported,  30 min, brisk walking |  | 9.2% completed 100% of walking program and 59.3% completed 80% or more of the walking program | data in forest plot |
| GDM | Nasiri-Amiri et al., 2016, Iran, Case Control (94) | GDM:  100 No GDM: 100 | 27.6 + 6.3 | GDM | Self-reported, total PA | The PA performed by the participants during their first 20 weeks of pregnancy was assessed at the time of enrollment, from 20th to 28th weeks of gestation. Activity with MET value ≤ 1.5 is considered as sedentary, from 1.5 to ≤ 3 as light, from 3 to 6 as moderate and MET scores ≥ 6 as vigorous intensity. Each PA variable was then divided into two with the median (low and high). | Frequency not reported, Sedentary: <1.5MET Light:  1.5-3 MET Moderate:  3-6 MET Vigorous:  6+MET, duration not reported |  |  | Narrative summary  Low PA based on the PPAQ (<median)  OR 1.09 (95% CI 0.30-3.96) Sedentary – Low  OR 2.32 (95% CI 1.21-4.43) Sedentary – Moderate  OR 1.70 (95% CI 0.81-3.57) Light – Low  OR 6.26 (95% CI 2.95-13.30) Light – Moderate  OR 2.91 (95% CI 1.41-6.01) Moderate – Low  OR 6.73 (95% CI 3.15-14.38) Moderate – Moderate  OR 2.26 (95% CI 1.10-4.63) Low PA at home based on the PPAQ (<median)  OR 2.17 (95% CI 0.62-7.59) |
| GDM/PE | Guelfi et al., 2016, Australia, RCT (24) | E: 85  C: 87 | E:  33.6 ± 4.1 C:  33.8 ± 3.9 | Hx of GDM | Self-reported, total PA/LTPA | Supervised intervention starting prior to 14 weeks gestation of a 14-week supervised home-based stationary cycling program. The duration of each session was progressively increased by 5-minute increments every 2–3 weeks, as tolerated, from 20 to 30 min to 60 min maximum. The degree of progression was dependent on the baseline fitness level of the woman and her ongoing pregnancy symptoms. | 3/week,  55-85% HR max BORG: 9-16,  20-60 min. Stationary bike |  | 86% of sessions completed (median) IQR 79-95%) | data in forest plot |
| GDM | Wang et al., 2016, China, RCT (25) | E: 132 C: 133 |  |  | Objective, LTPA | Supervised exercise starting <12 weeks gestation, the exercise group engaged in a supervised cycling program. During an averge duration of intervention 16 weeks. | 3/week, intensity and duration not reported, cycle ergometer |  | not reported | data in forest plot |
| GDM | Simmons et al., 2016b, UK, Ireland, Netherlands, Austria, Poland, Italy, Spain, Denmakr, Belgium, RCT (26)(50068) | C: 105 D+E: 108 E: 110 | C:  31.8 ± 5.6 D+E:  31.9 ± 5.3 E:  31.7 ± 5.1 | BMI >29 | Objective, total PA | Unsupervised exercise starting before 20 weeks gestation. The PA intervention promoted both aerobic and resistance PA. | Frequency not reported,  22-44 MET hr MVPA/week, duration not reported,  aerobic and resistance PA | nutrition | not reported | data in forest plot |
| GDM | Asbee et al, 2009, USA, RCT (46) | E: 57 C: 43 | E:  26.7 ± 6.0 C:  26.4 ± 5.0 |  | Self-reported, LTPA | Counselling intervention starting before 16 weeks gestation. Women were counselled at obstetrical appointments when weight gain was above recommendations. Patients were instructed to engage in moderate-intensity exercise at least three times per week and preferably five times per week. | 3-5/week, moderate intensity,  duration not reported | nutrition | OW women in each of the groups were adherent 30.0% (intensive counseling) and 25.0% (routine care) of the time. OB women in each of the groups were adherent 33.3% (intensive counseling) and 20.0% (routine care) of the time, compared with 80.0% (intensive counseling) and 68.8% (routine care) among participants with healthy BMI | Narrative summary  NOT STATS, just: "No statistically significant differences were noted between the groups in adherence to IOM guidelines, rate of cesarean delivery, preeclampsia, gestational diabetes mellitus, operative vaginal delivery, or vaginal lacerations." |
| GDM | Vesco et al., 2014, USA, RCT (45) | E: 56 C: 58 | E:  32.4 ±5.1 C:  31.2 ± 4.6 | Obese | Objective, LTPA | Counselling intervention starting before 21 weeks gestation. The intervention leaders encouraged participants to accumulate at least 30 min of MVPA per day in the absence of medical or obstetrical complications. They gave each intervention participant a pedometer, and encouraged them to record their PA in their daily food and activity records. The intervention did not involve an exercise component that was directly observed by the study team. | 7/week,  moderate intensity,  30 min | nutrition | Attendance was of 20±7 (range 0 to 28) weekly sessions. When number of sessions was normalized for number of weekly sessions women could have attended, attendance was of 79±25% (range 0 to 100%). | data in forest plot |

**Abbreviations**: BMI: body mass index; GDM: gestational diabetes mellitus; GH: gestational hypertension; IPAQ: International physical activity questionnaire; KPAS : Kaiser Physical Activity Survey; LTPA : leisure time physical activity; MVPA: moderate-to-vigorous physical activity; NW: normal weight women; OB: women with obesity; OW: women with overweight; PA : physical activity; PE: preeclampsia; PFMT: pelvic floor muscle training; PIH: pregnancy-induced hypertension; PPAQ: pregnancy physical activity questionnaire; RCT: randomized controlled trial

**Table 2**: The association between prenatal exercise and gestational diabetes mellitus.

| **Quality assessment** | | | | | | | **№ of participants** | | **Effect** | | **Quality of evidence** | **Importance** |
| --- | --- | --- | --- | --- | --- | --- | --- | --- | --- | --- | --- | --- |
| **№ of studies *** | **Study design** | **Risk of bias** | **Inconsistency** | **Indirectness** | **Imprecision** | **Other considerations** | **Exercise** | **No exercise** | **Relative (95% CI)** | **Absolute (95% CI)** |
| Association between prenatal exercise (exercise-only interventions and exercise + co-interventions) and GDM | | | | | | | | | | | | |
| 46 (pooled estimate of effect, n = 45 studies a,b; 1 study reported narratively) | randomized trials | serious c | not serious | serious d | not serious | none | 846/7598 (11.1%) | 930/7225 (12.9%) | **OR 0.76** (0.65 to 0.88) | **28 fewer per 1 000** (from 14 fewer to 41 fewer) | ⨁⨁◯◯ LOW | CRITICAL |
| Narrative Summary: Asbee (2009) randomized 100 women to lifestyle counseling (n=57) or routine prenatal care (n=43). The rate of GDM did not differ between the groups (statistics not provided). | | | |
| Sensitivity analysis: Association between exercise-only interventions and GDM | | | | | | | | | | | | |
| 26 | randomized trials | serious c | not serious | not serious | not serious | none | 271/3505 (7.7%) | 380/3429 (11.1%) | **OR 0.62** (0.52 to 0.75) | **39 fewer per 1 000** (from 25 fewer to 50 fewer) | ⨁⨁⨁◯ MODERATE | CRITICAL |
| Sensitivity analysis: Association between exercise + co-interventions and GDM | | | | | | | | | | | | |
| 23 (pooled estimate of effect, n=22 b; 1 study reported narratively) | randomized trials | serious c | not serious | serious e | not serious | none | 575/4093 (14.0%) | 550/3796 (14.5%) | **OR 0.90** (0.74 to 1.10) | **13 fewer per 1 000** (from 12 more to 33 fewer) | ⨁⨁◯◯ LOW | CRITICAL |
| Narrative Summary: Asbee (2009) randomized 100 women to lifestyle counseling (n=57) or routine prenatal care (n=43). The rate of GDM did not differ between the groups (statistics not provided). | | | |
| Subgroup analysis: Association between exercise-only interventions including aerobic exercise alone and GDM | | | | | | | | | | | | |
| 7 | randomised trials | serious f | not serious | not serious | not serious | none | 80/954 (8.4%) | 117/902 (13.0%) | **OR 0.60** (0.35 to 1.05) | **48 fewer per 1 000** (from 6 more to 80 fewer) | ⨁⨁⨁◯ MODERATE | CRITICAL |
| Subgroup analysis: Association between exercise-only interventions including resistance training alone and GDM | | | | | | | | | | | | |
| 2 | randomised trials | serious g | not serious | not serious | serious h | none | 19/203 (9.4%) | 23/200 (11.5%) | **OR 0.74** (0.36 to 1.51) | **27 fewer per 1 000** (from 49 more to 70 fewer) | ⨁⨁◯◯ LOW | CRITICAL |
| Subgroup analysis: Association between exercise-only interventions including pelvic floor muscle training alone and GDM | | | | | | | | | | | | |
| 1 | randomised trials | serious g | serious i | not serious | not serious j | none | 0/26 (0.0%) | 1/33 (3.0%) | **OR 0.41** (0.02 to 10.45) | **18 fewer per 1 000** (from 30 fewer to 216 more) | ⨁⨁◯◯ LOW | CRITICAL |
| Subgroup analysis: Association between exercise-only interventions including combinations of different types of exercise and GDM | | | | | | | | | | | | |
| 15 k | randomised trials | not serious l | not serious | not serious | not serious | none | 172/2322 (7.4%) | 239/2294 (10.4%) | **OR 0.63** (0.50 to 0.78) | **36 fewer per 1 000** (from 21 fewer to 49 fewer) | ⨁⨁⨁⨁ HIGH | CRITICAL |
| Subgroup analysis: Association between exercise-only interventions and GDM in women who were unsupervised during exercise | | | | | | | | | | | | |
| 8 | randomized trials | serious m | not serious | not serious | serious h | none | 93/1034 (9.0%) | 81/880 (9.2%) | **OR 0.81** (0.58 to 1.14) | **16 fewer per 1 000** (from 12 more to 37 fewer) | ⨁⨁◯◯ LOW | CRITICAL |
| Subgroup analysis: Association between exercise-only interventions and GDM in women who were supervised during exercise | | | | | | | | | | | | |
| 18 | randomized trials | serious g | not serious | not serious | not serious | none | 409/4128 (9.9%) | 532/4162 (12.8%) | **OR 0.69** (0.56 to 0.85) | **36 fewer per 1 000** (from 17 fewer to 52 fewer) | ⨁⨁⨁◯ MODERATE | CRITICAL |
| Subgroup analysis: Association between exercise-only interventions and GDM in women with previously unspecified exercise levels | | | | | | | | | | | | |
| 19 | randomized trials | serious m | not serious | not serious | not serious | none | 180/2525 (7.1%) | 234/2447 (9.6%) | **OR 0.64** (0.49 to 0.85) | **32 fewer per 1 000** (from 13 fewer to 46 fewer) | ⨁⨁⨁◯ MODERATE | CRITICAL |
| Subgroup analysis: Association between exercise-only interventions and GDM in women who were previously inactive | | | | | | | | | | | | |
| 7 | randomized trials | serious g | not serious | not serious | not serious | none | 91/955 (9.5%) | 146/982 (14.9%) | **OR 0.59** (0.44 to 0.79) | **55 fewer per 1 000** (from 27 fewer to 77 fewer) | ⨁⨁⨁◯ MODERATE | CRITICAL |
| Subgroup analysis: Association between exercise-only interventions and GDM in women from the general population (i.e., any weight status) | | | | | | | | | | | | |
| 17 | randomized trials | serious g | not serious | not serious | not serious | none | 194/2935 (6.6%) | 310/2981 (10.4%) | **OR 0.59** (0.48 to 0.73) | **40 fewer per 1 000** (from 26 fewer to 51 fewer) | ⨁⨁⨁◯ MODERATE | CRITICAL |
| Subgroup analysis: Association between exercise-only interventions and GDM in women with overweight or obesity | | | | | | | | | | | | |
| 10 | randomized trials | serious m | not serious | not serious | serious h | none | 77/570 (13.5%) | 70/448 (15.6%) | **OR 0.76** (0.52 to 1.13) | **33 fewer per 1 000** (from 17 more to 68 fewer) | ⨁⨁◯◯ LOW | CRITICAL |
| Evidence from non-randomized interventions; sensitivity analysis: Association between exercise-only interventions and GDM | | | | | | | | | | | | |
| 1 n | observational studies o | serious p | serious i | not serious | not serious j | none | Narrative Summary: In the study by Dyck (1999) (supervised exercise intervention, n=7), 3 women (43%) developed GDM. | | | | ⨁◯◯◯ VERY LOW | CRITICAL |
| Evidence from non-randomized interventions; sensitivity analysis: Association between exercise + co-interventions and GDM | | | | | | | | | | | | |
| 5 (pooled estimate of effect, n=4 b; 1 study reported narratively) | observational studies o | serious c | not serious | serious e | not serious | none | 29/165 (17.6%) | 52/181 (28.7%) | **OR 0.47** (0.25 to 0.88) | **128 fewer per 1 000** (from 25 fewer to 196 fewer) | ⨁◯◯◯ VERY LOW | CRITICAL |
| Narrative Summary: McGiveron (2015) included 178 women (programme of health education around diet and exercise, n=89; control, n=89). The odds of GDM did not differ between the intervention and the control groups (OR 1.139, 95% CI 0.419, 3.100). | | | |
| Evidence from cohort studies: Association between prenatal exercise and GDM | | | | | | | | | | | | |
| 14 (pooled estimate of effect q, n=9; 5 studies synthesized narratively) | observational studies r | serious s | not serious | not serious | not serious | none | 189/6975 (2.7%) | 154/2620 (5.9%) | **OR 0.69** (0.54 to 0.88) | **17 fewer per 1 000** (from 7 fewer to 26 fewer) | ⨁◯◯◯ VERY LOW | CRITICAL |
| Narrative Synthesis: Five cohort studies were included (n=19,803).  3/5 (n=16,814) reported between 11 to 90% decreased odds of GDM with prenatal physical activity compared to no exercise (Iqbal, 2007; Morkrid, 2014; Chasan-Taber, 2008)  2/5 (n=2989) reported that prenatal physical activity did not affect odds of GDM compared to no physical activity (Currie 2014; Chasan-Taber, 2015).  Additional data from Badon (2016b) showed an association between LTPA and GDM. t | | | |
| Evidence from cross-sectional studies : Association between prenatal exercise and GDM | | | | | | | | | | | | |
| 7 (pooled estimate of effect, n=4 u; 3 studies synthesized narratively) | observational studies v | serious w | not serious | not serious | not serious | none | 86/3265 (2.6%) | 50/2375 (2.1%) | **OR 0.66** (0.45 to 0.97) | **7 fewer per 1 000** (from 1 fewer to 11 fewer) | ⨁◯◯◯ VERY LOW | CRITICAL |
| Narrative Synthesis: Three cross-sectional studies were included (n=12,189).  2/3 (n=739) reported no association between prenatal physical activity and (Li, 2014; Momeni Javid 2015).  1/3 (n=11,450) showed a decrease in odds of GDM with moderate to high activity compared to low activity (Leng, 2016).  Additional data from Oken (2006) showed no effect of any light, moderate or vigorous intensity physical activity on GDM. x | | | |
| Evidence from cross-sectional studies, subgroup analysis: Association between prenatal exercise and GDM in women with previously unspecified physical activity levels | | | | | | | | | | | | |
| 6 (pooled estimate of effect, n=3 u; 3 studies synthesized narratively) | observational studies v | serious w | not serious | not serious | serious h | none | 86/3232 (2.7%) | 48/2363 (2.0%) | **OR 0.69** (0.47 to 1.03) | **6 fewer per 1 000** (from 1 more to 11 fewer) | ⨁◯◯◯ VERY LOW | CRITICAL |
| Narrative Synthesis: Three cross-sectional studies were included (n=12,189).  2/3 (n=739) reported no association between prenatal physical activity and (Li, 2014; Momeni Javid 2015).  1/3 (n=11,450) showed a decrease in odds of GDM with moderate to high activity compared to low activity (Leng, 2016). | | | |
| Evidence from cross-sectional studies, subgroup analysis: Association between prenatal exercise and GDM in women who were previously active | | | | | | | | | | | | |
| 1 | observational studies v | serious y | serious i | not serious | not serious j | none | 0/33 (0.0%) | 2/12 (16.7%) | **OR 0.11** (0.01 to 1.19) | **145 fewer per 1 000** (from 26 more to 165 fewer) | ⨁◯◯◯ VERY LOW | CRITICAL |
| Narrative Summary: Additional data from Oken (2006) showed no effect of any light, moderate or vigorous intensity physical activity on the odds of developing GDM. x | | | |
| Evidence from case-control studies: Association between prenatal exercise and GDM | | | | | | | | | | | | |
| 3 b | observational studies z | not serious aa | serious ab | not serious | serious h | none | 74/271 (27.3%) | 122/376 (32.4%) | **OR 0.63** (0.30 to 1.31) | **92 fewer per 1 000** (from 62 more to 199 fewer) | ⨁◯◯◯ VERY LOW | CRITICAL |
| Narrative Summary: Nasiri-Amiri (2016) (GDM, n=100; no GDM, n=100) found no association between prenatal physical activity and GDM, no matter the intensity of physical activity. | | | |

**CI:** Confidence interval; **GDM**: Gestational diabetes mellitus; **OR:** Odds ratio. * Unless otherwise stated, all studies are included in the pooled estimate.

#### Explanations

a. Three studies reported data on different subgroups of women. These studies were counted only once.

b. One study could not be pooled due to incomplete reporting of results; results were reported narratively.

c. Serious risk of bias. High risk of performance and attrition bias. Reporting bias was an issue in one study (results were reported narratively).

d. Serious indirectness. Exercise-only interventions and exercise+co-interventions were combined for analysis.

e. Serious indirectness. Exercise was combined with a co-intervention.

f. Serious risk of bias. High risk of performance bias. Unclear risk of selection bias; it was unknown if allocation concealment was adequate.

g. Serious risk of bias. High risk of attrition bias.

h. Serious imprecision. The 95% CI crossed the line of no effect, and was wide, such that interpretation of the data would be different if the true effect were at one end of the CI or the other.

i. Serious inconsistency. Only one study was included.

j. No serious imprecision; only one study but already downgraded for serious inconsistency for this reason.

k. Two studies reported data on different subgroups of women. These studies were counted only once.

l. No serious risk of bias. Unclear risk of selection bias; it was unknown if allocation concealment was adequate.

m. Serious risk of bias. High risk of performance bias.

n. This study did not include a control group such that it could not be included in the meta-analysis (results were reported narratively).

o. Non-randomized interventions

p. Serious risk of bias. High risk of performance bias. This study did not include a control group such that it could not be included in the meta-analysis (narrative synthesis only).

q. Five studies could not be pooled due to incomplete reporting of results; results were reported narratively.

r. Cohort studies

s. Serious risk of bias. Reporting bias was an issue in 6 studies (2/3 of the sample) (results were reported narratively).

t. Badon 2016a and Badon 2016b reported data from the same cohort study and were counted as one study. Data from Badon 2016a were included in the meta-analysis; data from Badon 2016b were reported narratively (incomplete reporting of data).

u. Three studies could not be pooled due to incomplete reporting of results; results were reported narratively.

v. Cross-sectional studies

w. Serious risk of bias. High risk of performance bias (potentially flawed measurement of the exposure; unknown validity of prospective and retrospective physical activity measure). Reporting bias was an issue in 4 studies (3/4 of the sample); results were reported narratively.

x. Oken (2006) reported data that were included in the meta-analysis and data that were not (incomplete reporting of data; additional data were reported narratively).

y. Serious risk of bias. High risk of performance bias (potentially flawed measurement of the exposure; unknown validity of prospective and retrospective physical activity measure).

z. Case-control studies

aa. Reporting bias was an issue in one study (results were reported narratively).

ab. Serious inconsistency. High heterogeneity (I2≥50%).

**Table 3**: The association between prenatal exercise and gestational hypertension.

| **Quality assessment** | | | | | | | **№ of participants** | | **Effect** | | **Quality of evidence** | **Importance** |
| --- | --- | --- | --- | --- | --- | --- | --- | --- | --- | --- | --- | --- |
| **№ of studies *** | **Study design** | **Risk of bias** | **Inconsistency** | **Indirectness** | **Imprecision** | **Other considerations** | **Exercise** | **No exercise** | **Relative (95% CI)** | **Absolute (95% CI)** |
| Association between prenatal exercise (exercise-only interventions and exercise + co-interventions) and GH | | | | | | | | | | | | |
| 34 (pooled estimate of effect, n =32 a,b; 2 studies synthesized narratively) | randomized trials | serious c | not serious | serious d | not serious | none | 255/4859 (5.2%) | 300/4789 (6.3%) | **OR 0.81** (0.65 to 1.00) | **11 fewer per 1 000** (from 0 fewer to 21 fewer) | ⨁⨁◯◯ LOW | CRITICAL |
| Narrative Synthesis: Two superiority trials were included (n=107).  Yeo (2008) reported that GH incidence was 22 % in women randomized to a walking intervention (n=41) and 40% in those randomized to a stretching intervention (n=38).  McAuley (2005) reported 2 cases of GH in both groups of women (aerobic and muscular exercise group [n=14] and muscular exercise group [n=14]). | | | |
| Sensitivity analysis: Association between exercise-only interventions and GH | | | | | | | | | | | | |
| 24 (pooled estimate of effect, n =22 b,e; 2 studies synthesized narratively) | randomized trials | not serious f | not serious | not serious | not serious | none | 61/2627 (2.3%) | 105/2689 (3.9%) | **OR 0.61** (0.43 to 0.85) | **15 fewer per 1 000** (from 6 fewer to 22 fewer) | ⨁⨁⨁⨁ HIGH | CRITICAL |
| Narrative Synthesis: Two superiority trials were included (n=107).  Yeo (2008) reported that GH incidence was 22 % in women randomized to a walking intervention (n=41) and 40% in those randomized to a stretching intervention (n=38).  McAuley (2005) reported 2 cases of GH in both groups of women (aerobic and muscular exercise group [n=14] and muscular exercise group [n=14]). | | | |
| Sensitivity analysis: Association between exercise + co-interventions and GH | | | | | | | | | | | | |
| 11 e | randomized trials | serious c | not serious | serious g | serious h | none | 194/2232 (8.7%) | 195/2100 (9.3%) | **OR 0.95** (0.72 to 1.27) | **4 fewer per 1 000** (from 22 more to 24 fewer) | ⨁◯◯◯ VERY LOW | CRITICAL |
| Subgroup analysis: Association between exercise-only interventions including aerobic exercise alone and GH | | | | | | | | | | | | |
| 6 i | randomised trials | not serious | not serious | not serious | serious h | none | 22/787 (2.8%) | 21/731 (2.9%) | **OR 0.96** (0.53 to 1.77) | **1 fewer per 1 000** (from 13 fewer to 21 more) | ⨁⨁⨁◯ MODERATE | CRITICAL |
| Subgroup analysis: Association between exercise-only interventions including resistance training alone and GH | | | | | | | | | | | | |
| 1 | randomised trials | serious j | serious k | not serious | not serious l | none | 1/80 (1.3%) | 2/80 (2.5%) | **OR 0.49** (0.04 to 5.56) | **13 fewer per 1 000** (from 24 fewer to 100 more) | ⨁⨁◯◯ LOW | CRITICAL |
| Subgroup analysis: Association between exercise-only interventions including combinations of different types of exercise and GH | | | | | | | | | | | | |
| 16 | randomised trials | not serious f | not serious | not serious | not serious | none | 38/1760 (2.2%) | 82/1878 (4.4%) | **OR 0.50** (0.33 to 0.74) | **21 fewer per 1 000** (from 11 fewer to 29 fewer) | ⨁⨁⨁⨁ HIGH | CRITICAL |
| Subgroup analysis: Association between exercise-only interventions GH in women who were unsupervised during exercise | | | | | | | | | | | | |
| 4 (pooled estimate of effect, n =4 e,m; 1 study reported narratively) | randomized trials | serious n | not serious | not serious | serious h | none | 5/253 (2.0%) | 4/219 (1.8%) | **OR 0.97** (0.25 to 3.80) | **1 fewer per 1 000** (from 14 fewer to 48 more) | ⨁⨁◯◯ LOW | CRITICAL |
| Narrative Summary: Yeo (2008) reported that GH incidence was 22 % in women randomized to a walking intervention (n=41) and 40 in those randomized to a stretching intervention (n=38). | | | |
| Subgroup analysis: Association between exercise-only interventions and GH in women who were supervised during exercise | | | | | | | | | | | | |
| 19 (pooled estimate of effect, n =18 m; 1 study reported narratively) | randomized trials | not serious f | not serious | not serious | not serious | none | 56/2374 (2.4%) | 101/2470 (4.1%) | **OR 0.59** (0.42 to 0.83) | **16 fewer per 1 000** (from 7 fewer to 23 fewer) | ⨁⨁⨁⨁ HIGH | CRITICAL |
| Narrative Summary: McAuley (2005) reported 2 cases of GH in both groups of women (aerobic and muscular exercise group [n=14] and muscular exercise group [n=14]). | | | |
| Subgroup analysis: Association between exercise-only interventions and GH in women with previously unspecified exercise levels | | | | | | | | | | | | |
| 12 | randomized trials | not serious | not serious | not serious | serious h | none | 37/1578 (2.3%) | 53/1632 (3.2%) | **OR 0.70** (0.45 to 1.09) | **10 fewer per 1 000** (from 3 more to 18 fewer) | ⨁⨁⨁◯ MODERATE | CRITICAL |
| Subgroup analysis: Association between exercise-only interventions and GH in women who were previously inactive | | | | | | | | | | | | |
| 12 (pooled estimate of effect, n =10 b,e; 2 studies synthesized narratively) | randomized trials | not serious f | not serious | not serious | not serious | none | 24/1049 (2.3%) | 52/1057 (4.9%) | **OR 0.49** (0.29 to 0.83) | **24 fewer per 1 000** (from 8 fewer to 34 fewer) | ⨁⨁⨁⨁ HIGH | CRITICAL |
| Narrative Synthesis: Two superiority trials were included (n=107).  Yeo (2008) reported that GH incidence was 22 % in women randomized to a walking intervention (n=41) and 40% in those randomized to a stretching intervention (n=38).  McAuley (2005) reported 2 cases of GH in both groups of women (aerobic and muscular exercise group [n=14] and muscular exercise group [n=14]). | | | |
| Subgroup analysis: Association between exercise-only interventions and GH in women from the general population (i.e., any weight status) | | | | | | | | | | | | |
| 19 (pooled estimate of effect, n =17 b; 2 studies synthesized narratively) | randomized trials | not serious f | not serious | not serious | not serious | none | 45/2258 (2.0%) | 83/2377 (3.5%) | **OR 0.58** (0.40 to 0.85) | **14 fewer per 1 000** (from 5 fewer to 21 fewer) | ⨁⨁⨁⨁ HIGH | CRITICAL |
| Narrative Synthesis: Two superiority trials were included (n=107).  Yeo (2008) reported that GH incidence was 22 % in women randomized to a walking intervention (n=41) and 40% in those randomized to a stretching intervention (n=38).  McAuley (2005) reported 2 cases of GH in both groups of women (aerobic and muscular exercise group [n=14] and muscular exercise group [n=14]). | | | |
| Subgroup analysis: Association between exercise-only interventions and GH in women with overweight or obesity | | | | | | | | | | | | |
| 6 e | randomized trials | serious o | not serious | not serious | serious h | none | 16/369 (4.3%) | 22/312 (7.1%) | **OR 0.70** (0.35 to 1.42) | **20 fewer per 1 000** (from 27 more to 45 fewer) | ⨁⨁◯◯ LOW | CRITICAL |
| Evidence from non-randomized interventions; sensitivity analysis: Association between exercise-only interventions and GH | | | | | | | | | | | | |
| 2 p | observational studies q | serious r | not serious | not serious | not serious | none | Narrative Synthesis: Two studies were included (n=367).  Narendran (2005) reported no difference in GH incidence between women who practiced yoga (n=169) and those who walked (n=166) during pregnancy (p=0.25).  O'Connor (2011) reported one case of severe hypertension (among 32 women, 3%) during a strength training intervention (no control group). | | | | ⨁◯◯◯ VERY LOW | CRITICAL |
| Evidence from non-randomized interventions; sensitivity analysis: Association between exercise + co-intervention and GH | | | | | | | | | | | | |
| 2 (pooled estimate of effect, n=1 s; 1 study reported narratively) | observational studies q | serious t | not serious | serious g | serious u | none | 2/21 (9.5%) | 1/20 (5.0%) | **OR 2.00** (0.17 to 23.96) | **45 more per 1 000** (from 41 fewer to 508 more) | ⨁◯◯◯ VERY LOW | CRITICAL |
| Narrative Summary: McGiveron (2015) reported lower odds of GH in women who participated in a prenatal counselling intervention about healthy lifestyle (n=89) compared to those who did not participate to the intervention (n=89). | | | |
| Evidence from cohort studies: Association between prenatal exercise and GH | | | | | | | | | | | | |
| 8 (pooled estimate of effect, n=5 v; 3 studies synthesized narratively) | observational studies w | serious x | not serious | not serious | serious h | none | 199/3777 (5.3%) | 133/1460 (9.1%) | **OR 0.86** (0.64 to 1.15) | **12 fewer per 1 000** (from 12 more to 31 fewer) | ⨁◯◯◯ VERY LOW | CRITICAL |
| Narrative Synthesis: Three cohort studies were included (n=76,260).  1/3 (n=1,749) reported 49% lower odds of GH with sports/exercise compared to no exercise (Currie, 2014).  2/3 (n=74,511) found no association between GH and prenatal exercise (Juhl, 2010; Chasan-Taber, 2015).  Additional data from Vollebregt (2010) showed no effect of prenatal exercise on GH, regardless of how it was examined (total LTPA vs sport, weekly duration or percentiles). y | | | |
| Evidence from cross-sectional studies: Association between prenatal exercise and GH | | | | | | | | | | | | |
| 5 (pooled estimate of effect, n=4 s; 1 study reported narratively) | observational studies z | serious aa | not serious | not serious | serious h | none | 107/1575 (6.8%) | 80/1090 (7.3%) | **OR 0.89** (0.66 to 1.21) | **8 fewer per 1 000** (from 14 more to 24 fewer) | ⨁◯◯◯ VERY LOW | CRITICAL |
| Narrative Summary: Martin (2010) reported lower odds of GH in women who were active at least once a week over the last 3 months of their pregnancy compared to those who were (n=3,348). | | | |
| Evidence from case-control studies: Association between prenatal exercise and GH | | | | | | | | | | | | |
| 4 | observational studies ab | serious ac | serious ad | not serious | serious h | none | 9037/20443 (44.2%) | 27980/55331 (50.6%) | **OR 0.89** (0.68 to 1.16) | **29 fewer per 1 000** (from 37 more to 95 fewer) | ⨁◯◯◯ VERY LOW | CRITICAL |
| Narrative Summary: Additional data from Marcoux (1989) (n=931) showed no association between LTPA during the first 20 weeks of pregnancy and GH, no matter the way LTPA was examined (hours/week, energy expenditure as kcal/min or kcal/week). ae | | | |
| Evidence from case-control studies, subgroup analysis: Association between prenatal exercise and GH in women from the general population (i.e. no GDM women) | | | | | | | | | | | | |
| 3 | observational studies ab | serious ac | not serious | not serious | serious h | none | 359/1185 (30.3%) | 209/3903 (5.4%) | **OR 0.99** (0.73 to 1.34) | **1 fewer per 1 000** (from 14 fewer to 17 more) | ⨁◯◯◯ VERY LOW | CRITICAL |
| Evidence from case-control studies, subgroup analysis: Association between prenatal exercise and GH in women with GDM | | | | | | | | | | | | |
| 1 | observational studies ab | serious al | serious k | not serious | not serious l | none | 8678/19258 (45.1%) | 27771/51428 (54.0%) | **OR 0.70** (0.68 to 0.72) | **89 fewer per 1 000** (from 82 fewer to 96 fewer) | ⨁◯◯◯ VERY LOW | CRITICAL |

**CI:** Confidence interval; **GH**: Gestational hypertension; **LTPA**: Leisure time physical activity; **OR:** Odds ratio. * Unless otherwise stated, all studies are included in the pooled estimate.

**Explanations**

a. One study included two intervention arms (exercise-only intervention and exercise + co-intervention). This study was counted only once. Two studies reported no cases of GH (not estimable result) and were not included in the pooled analysis.

b. Two superiority trials could not be pooled due to absence of a no-exercise control group; results were reported narratively.

c. Serious risk of bias. High risk of performance and attrition bias. Unclear risk of selection bias; it was unclear if allocation was adequately concealed.

d. Serious indirectness. Exercise-only interventions and exercise + co-interventions were combined for analysis.

e. One study reported no cases of GH (not estimable result) and was not included in the pooled analysis.

f. No serious risk of bias. Unclear risk of selection bias; it was unknown if allocation concealment was adequate.

g. Serious indirectness. Exercise was combined with a co-intervention.

h. Serious imprecision. The 95% CI crossed the line of no effect, and was wide, such that interpretation of the data would be different if the true effect were at one end of the CI or the other.

i. One study reported no cases of GH (not estimable result) and was not included in the pooled analysis.

j. Serious risk of bias. High risk of attrition bias.

k. Serious inconsistency. Only one study was included.

l. No serious imprecision; only one study but already downgraded for serious inconsistency for this reason.

m. One superiority trial could not be pooled due to absence of a no-exercise control group; results were reported narratively.

n. Serious risk of bias. High risk of performance and attrition bias. Unclear risk of selection bias; it was unknown if the method of sequence generation was adequate.

o. Serious risk of bias. High risk of performance and attrition bias.

p. The two studies could not be pooled due to absence of a no-exercise control group; results were reported narratively.

q. Non-randomized interventions

r. Serious risk of bias. High risk of performance bias. Unclear risk of attrition bias; attrition rate is unknown.

s. One study could not be pooled due to incomplete reporting of results; results were reported narratively.

t. Serious risk of bias. High risk of performance and attrition bias (women who completed the majority of the intervention were included in the intervention group; all women who failed to complete the majority of the intervention were excluded). Reporting bias was an issue in one study (results were reported narratively).

u. Serious imprecision. The study included in the pooled estimates presented a very wide confidence interval which suggested imprecision in the observed result.

v. Three studies could not be pooled due to incomplete reporting of results; results were reported narratively.

w. Cohort studies

x. Serious risk of bias. High risk of performance bias (potentially flawed measurement of the exposure; unknown validity of prospective and retrospective physical activity measure). Reporting bias was an issue in three studies; results were reported narratively.

y. Vollebregt (2010) reported data that were included in the meta-analysis and data that were not (incomplete reporting of data; additional data were reported narratively).

z. Cross-sectional studies

aa. Serious risk of bias. High risk of performance bias (potentially flawed measurement of the exposure; unknown validity of prospective and retrospective physical activity measure). Reporting bias was an issue in one study (incomplete reporting of data such that it could not be included in the meta-analysis; results were reported narratively).

ab. Case-control studies

ac. Serious risk of bias. High risk of performance bias (potentially flawed measurement of the exposure; unknown validity of prospective and retrospective physical activity measure).

ad. Serious inconsistency. High heterogeneity (I2≥50%)

ae. Marcoux (1989) reported data that were included in the meta-analysis and data that were not (incomplete reporting of data; additional data were reported narratively).

af. Serious risk of bias. High risk of performance bias (potentially flawed measurement of the exposure; unknown validity of retrospective physical activity measure).

**Online Supplement Table 4**: The association between prenatal exercise and preeclampsia.

| **Quality assessment** | | | | | | | **№ of participants** | | **Effect** | | **Quality of evidence** | | **Importance** |
| --- | --- | --- | --- | --- | --- | --- | --- | --- | --- | --- | --- | --- | --- |
| **№ of studies *** | **Study design** | **Risk of bias** | **Inconsistency** | **Indirectness** | **Imprecision** | **Other considerations** | **Exercise** | **No exercise** | **Relative (95% CI)** | **Absolute (95% CI)** |
| Association between prenatal exercise (exercise-only interventions and exercise + co-interventions) and PE | | | | | | | | | | | | | |
| 27 (pooled estimate of effect, n =26 a,b; 1 study reported narratively) | randomized trials | serious c | not serious | serious d | not serious | none | 214/5208 (4.1%) | 230/4969 (4.6%) | **OR 0.89** (0.73 to 1.08) | **5 fewer per 1 000** (from 4 more to 12 fewer) | ⨁⨁◯◯ LOW | CRITICAL | |
| Narrative Summary: Yeo (2008) reported that PE incidence was 14.6% in women randomized to a walking intervention (n=41) and 2.6% in those randomized to a stretching intervention (n=38). | | | |
| Sensitivity analysis: Association between exercise-only interventions and PE | | | | | | | | | | | | | |
| 16 (pooled estimate of effect, n =15 b,e; 1 study reported narratively) | randomized trials | serious f | not serious | not serious | not serious | none | 34/1719 (2.0%) | 49/1603 (3.1%) | **OR 0.59** (0.37 to 0.94) | **12 fewer per 1 000** (from 2 fewer to 19 fewer) | ⨁⨁⨁◯ MODERATE | | CRITICAL |
| Narrative Summary: Yeo (2008) reported that PE incidence was 14.6% in women randomized to a walking intervention (n=41) and 2.6% in those randomized to a stretching intervention (n=38). | | | |
| Sensitivity analysis: Association between exercise + co-interventions and PE | | | | | | | | | | | | | |
| 12 e | randomized trials | serious c | not serious | serious g | not serious | none | 180/3489 (5.2%) | 181/3366 (5.4%) | **OR 0.97** (0.78 to 1.21) | **2 fewer per 1 000** (from 11 fewer to 11 more) | ⨁⨁◯◯ LOW | | CRITICAL |
| Subgroup analysis: Association between exercise-only interventions including aerobic exercise alone and PE | | | | | | | | | | | | | |
| 10 h | randomised trials | not serious | not serious | not serious | serious i | none | 29/1096 (2.6%) | 34/980 (3.5%) | **OR 0.67** (0.39 to 1.14) | **11 fewer per 1 000** (from 5 more to 21 fewer) | ⨁⨁⨁◯ MODERATE | | CRITICAL |
| Subgroup analysis: Association between exercise-only interventions including resistance training alone and PE | | | | | | | | | | | | | |
| 1 | randomised trials | serious f | serious j | not serious | not serious k | none | 2/131 (1.5%) | 5/130 (3.8%) | **OR 0.39** (0.07 to 2.03) | **23 fewer per 1 000** (from 36 fewer to 37 more) | ⨁⨁◯◯ LOW | | CRITICAL |
| Subgroup analysis: Association between exercise-only interventions including combinations of different types of exercise and PE | | | | | | | | | | | | | |
| 4 e | randomised trials | not serious l | not serious | not serious | serious i | none | 3/492 (0.6%) | 10/493 (2.0%) | **OR 0.37** (0.10 to 1.40) | **13 fewer per 1 000** (from 8 more to 18 fewer) | ⨁⨁⨁◯ MODERATE | | CRITICAL |
| Subgroup analysis: Association between exercise-only interventions and PE in women who were unsupervised during exercise | | | | | | | | | | | | | |
| 6 (pooled estimate of effect, n =5 b; 1 study reported narratively) | randomized trials | serious m | not serious | not serious | serious i | none | 7/270 (2.6%) | 5/211 (2.4%) | **OR 1.00** (0.32 to 3.12) | **0 fewer per 1 000** (from 16 fewer to 47 more) | ⨁⨁◯◯ LOW | | CRITICAL |
| Narrative Summary: Yeo (2008) reported that PE incidence was 14.6% in women randomized to a walking intervention (n=41) and 2.6% in those randomized to a stretching intervention (n=38). | | | |
| Subgroup analysis: Association between exercise-only interventions and PE in women who were supervised during exercise | | | | | | | | | | | | | |
| 10 e | randomized trials | serious f | not serious | not serious | not serious | none | 27/1449 (1.9%) | 44/1392 (3.2%) | **OR 0.52** (0.31 to 0.88) | **15 fewer per 1 000** (from 4 fewer to 22 fewer) | ⨁⨁⨁◯ MODERATE | | CRITICAL |
| Subgroup analysis: Association between exercise-only interventions and PE in women with previously unspecified exercise levels | | | | | | | | | | | | | |
| 10 e | randomized trials | serious f | not serious | not serious | not serious | none | 18/1425 (1.3%) | 32/1367 (2.3%) | **OR 0.52** (0.28 to 0.98) | **11 fewer per 1 000** (from 0 fewer to 17 fewer) | ⨁⨁⨁◯ MODERATE | | CRITICAL |
| Subgroup analysis: Association between exercise-only interventions and PE in women who were previously inactive | | | | | | | | | | | | | |
| 6 (pooled estimate of effect, n =5 b; 1 study reported narratively) | randomized trials | serious f | not serious | not serious | serious i | none | 16/294 (5.4%) | 17/236 (7.2%) | **OR 0.68** (0.33 to 1.39) | **22 fewer per 1 000** (from 25 more to 47 fewer) | ⨁⨁◯◯ LOW | | CRITICAL |
| Narrative Summary: Yeo (2008) reported that PE incidence was 14.6% in women randomized to a walking intervention (n=41) and 2.6% in those randomized to a stretching intervention (n=38). | | | |
| Subgroup analysis: Association between exercise-only interventions and PE in women from the general population (i.e., any weight status) | | | | | | | | | | | | | |
| 12 (pooled estimate of effect, n =11 b; 1 study reported narratively) | randomized trials | serious f | not serious | not serious | not serious | none | 28/1515 (1.8%) | 45/1458 (3.1%) | **OR 0.54** (0.33 to 0.90) | **14 fewer per 1 000** (from 3 fewer to 20 fewer) | ⨁⨁⨁◯ MODERATE | | CRITICAL |
| Narrative Summary: Yeo (2008) reported that PE incidence was 14.6% in women randomized to a walking intervention (n=41) and 2.6% in those randomized to a stretching intervention (n=38). | | | |
| Subgroup analysis: Association between exercise-only interventions and PE in women with overweight or obesity | | | | | | | | | | | | | |
| 4 e | randomized trials | serious n | not serious | not serious | serious i | none | 6/204 (2.9%) | 4/145 (2.8%) | **OR 1.00** (0.27 to 3.73) | **0 fewer per 1 000** (from 20 fewer to 68 more) | ⨁⨁◯◯ LOW | | CRITICAL |
| Evidence from non-randomized interventions; sensitivity analysis: Association between exercise-only intervention and PE | | | | | | | | | | | | | |
| 1 o | observational studies p | serious f | serious j | not serious | not serious k | none | Narrative Summary: In the study by Dyck (1999) (supervised exercise intervention, n=7), one woman (14%) developed PE. | | | | ⨁◯◯◯ VERY LOW | | CRITICAL |
| Evidence from non-randomized interventions; sensitivity analysis: Association between exercise + co-intervention and PE | | | | | | | | | | | | | |
| 3 (pooled estimate of effect, n =2; 1 study reported narratively) | observational studies p | serious q | not serious | serious g | serious i | none | 20/232 (8.6%) | 22/167 (13.2%) | **OR 0.76** (0.26 to 2.20) | **28 fewer per 1 000** (from 94 fewer to 119 more) | ⨁◯◯◯ VERY LOW | | CRITICAL |
| Narrative Summary: McGiveron (2015) reported lower odds of PE in women who participated in a prenatal counselling intervention about healthy lifestyle (n=89) compared to those who did not participate to the intervention (n=89). | | | |
| Evidence from cohort studies : Association between prenatal exercise and PE | | | | | | | | | | | | | |
| 9 (pooled estimate of effect, n =6; 3 studies synthesized narratively) | observational studies r | serious s | not serious | not serious | not serious | none | 1952/51843 (3.8%) | 653/15639 (4.2%) | **OR 0.87** (0.78 to 0.97) | **5 fewer per 1 000** (from 1 fewer to 9 fewer) | ⨁◯◯◯ VERY LOW | | CRITICAL |
| Narrative Synthesis: Three cohort studies were included (n=76,260)  3/3 found no association between prenatal exercise and PE, no matter the intensity or volume of exercise (Currie, 2014; Juhl, 2010; Chasan-Taber, 2015).  Additional data from Rudra (2008) and Magnus (2008) indicated lower odds of PE with prenatal physical activity. However, additional data from Vollebregt (2010) showed no association between prenatal exercise and PE. t | | | |
| Evidence from cross-sectional studies : Association between prenatal exercise and PE | | | | | | | | | | | | | |
| 2 | observational studies u | serious v | not serious | not serious | serious i | none | 45/1595 (2.8%) | 32/1107 (2.9%) | **OR 0.64** (0.39 to 1.05) | **10 fewer per 1 000** (from 1 more to 17 fewer) | ⨁◯◯◯ VERY LOW | | CRITICAL |
| Evidence from case-control studies : Association between prenatal exercise and PE | | | | | | | | | | | | | |
| 4 | observational studies w | serious x | not serious | not serious | not serious | none | 409/1464 (27.9%) | 310/4154 (7.5%) | **OR 0.75** (0.59 to 0.99) | **18 fewer per 1 000** (from 1 fewer to 29 fewer) | ⨁◯◯◯ VERY LOW | | CRITICAL |
| Narrative Summary: Additional data from Marcoux (1989) (n=931) indicated 47 to 43% lower odds of PE with heavy LTPA compared to light/moderate LTPA. y | | | |

**CI:** Confidence interval; **OR:** Odds ratio. * Unless otherwise stated, all studies are included in the pooled estimate.

#### Explanations

a. One study included two intervention arms (exercise-only intervention and exercise + co-intervention). This study was counted only once. Two studies reported no cases of PE (not estimable result) and were not included in the pooled analysis.

b. One superiority trial could not be pooled due to absence of a no-exercise control group; results were reported narratively.

c. Serious risk of bias. High risk of performance bias. Unclear risk of selection bias; it was unclear if allocation was adequately concealed.

d. Serious indirectness. Exercise-only interventions and exercise + co-interventions were combined for analysis

e. One study reported no cases of PE (not estimable result) and was not included in the pooled analysis.

f. Serious risk of bias. High risk of performance bias.

g. Serious indirectness because exercise was combined with a co-intervention.

h. One study reported data on different subgroups of women. This study was counted only once.

i. Serious imprecision. The 95% CI crossed the line of no effect, and was wide, such that interpretation of the data would be different if the true effect were at one end of the CI or the other.

j. Serious inconsistency. Only one study was included.

k. No serious imprecision; only one study but already downgraded for serious inconsistency for this reason.

l. No serious risk of bias. Unclear risk of selection bias; it was unknown if allocation concealment was adequate.

m. Serious risk of bias. High risk of performance and attrition bias.

n. Serious risk of bias. High risk of performance and attrition bias. Unclear risk of selection bias; it was unknown if sequence was adequately generated.

o. This study could not be included in the meta-analysis due to absence of a no-exercise control group; results were reported narratively.

p. Non-randomized intervention

q. Serious risk of bias. High risk of performance bias. Reporting bias was an issue in one study; results were reported narratively.

r. Cohort studies

s. Serious risk of bias. High risk of performance bias (potentially flawed measurement of the exposure; unknown validity of prospective and retrospective physical activity measure). Reporting bias was an issue in three studies; results were reported narratively.

t. Rudra (2008), Magnus (2008) and Vollebregt (2010) reported data that were included in the meta-analysis and data that were not (incomplete reporting of data; additional data were reported narratively).

u. Cross-sectional studies

v. Serious risk of bias. High risk of performance bias (potentially flawed measurement of the exposure; unknown validity of physical activity measure).

w. Case-control studies

x. Serious risk of bias. High risk of performance bias (potentially flawed measurement of the exposure; unknown validity of prospective and retrospective physical activity measure).

y. Marcoux (1989) reported data that were included in the meta-analysis and data that were not (incomplete reporting of data; additional data were reported narratively).

**3) Supplementary Figures**


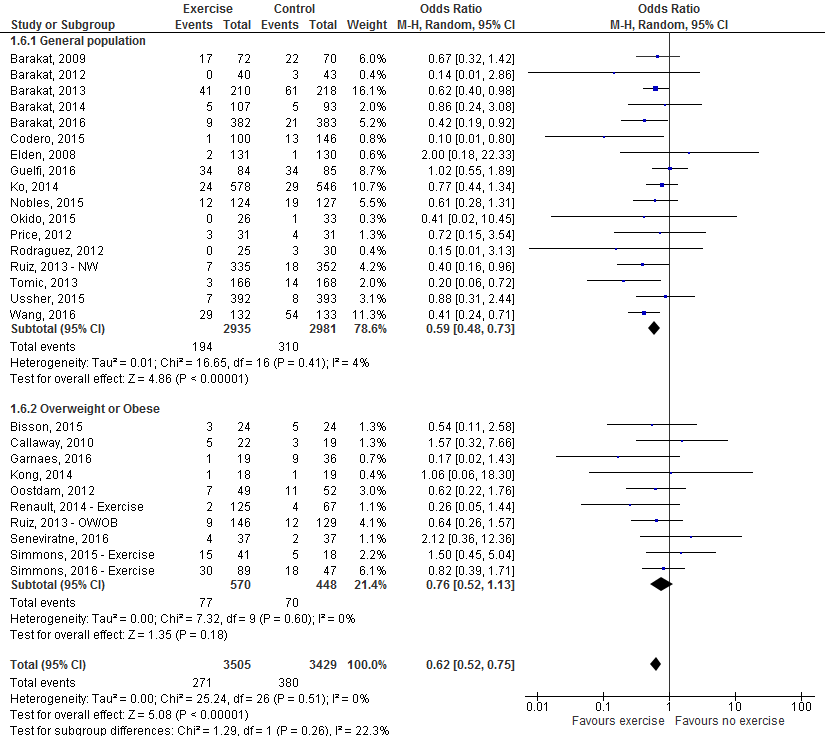


Online Supplement Figure 1: Effects of prenatal exercise-only interventions (RCTs) compared with control on odds of gestational diabetes mellitus. Subgroup analyses were conducted with studies including women of all body weight status (defined as “general population”) and with those including women with overweight/obesity. Analyses conducted with a random effects model. CI, confidence interval; df, degrees of freedom; M-H, Mantel-Haenszel method. Exercise: exercise arm of the intervention; NW: subgroup of normal weight women; OW/OB: subgroup of women with overweight/obesity.


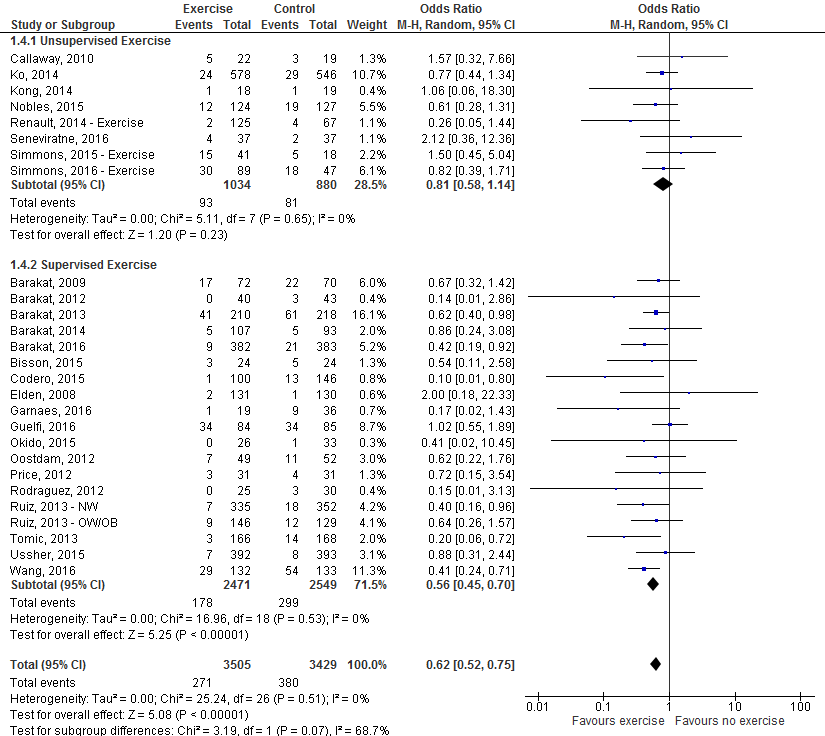


Online Supplement Figure 2: Effects of prenatal exercise-only interventions (RCTs) compared with control on odds of gestational diabetes mellitus. Subgroup analyses were conducted with studies including unsupervised exercise and with those including supervised exercise. Analyses conducted with a random effects model. CI, confidence interval; df, degrees of freedom; M-H, Mantel-Haenszel method. NW: subgroup of normal weight women; OW/OB: subgroup of women with overweight/obesity.


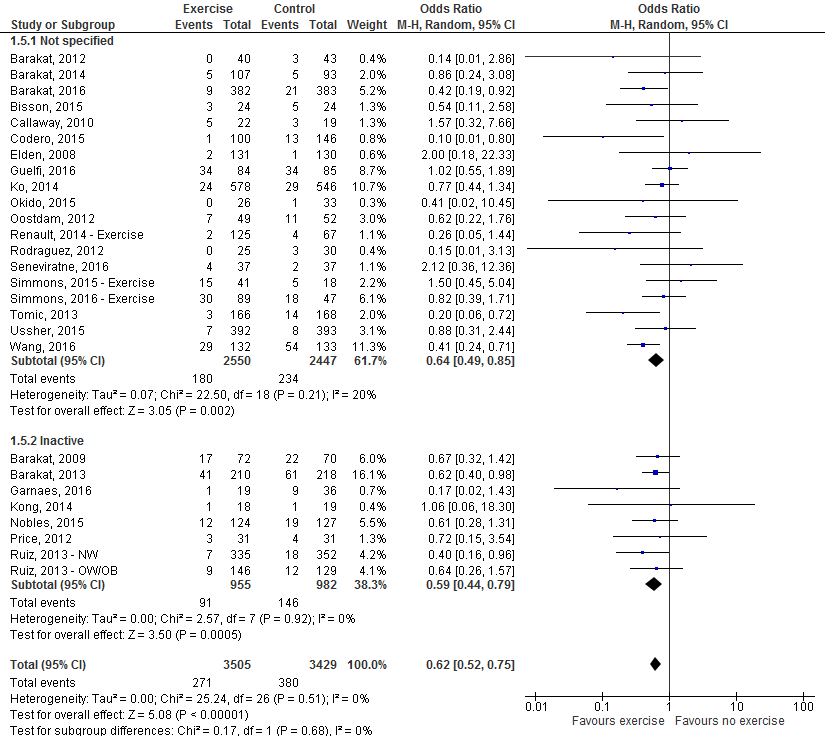


Online Supplement Figure 3: Effects of prenatal exercise-only interventions (RCTs) compared with control on odds of gestational diabetes mellitus. Subgroup analyses were conducted with studies not specifying previous physical activity levels of the women and with those including women who were previously inactive. Analyses conducted with a random effects model. CI, confidence interval; df, degrees of freedom; M-H, Mantel-Haenszel method. NW: subgroup of normal weight women; OW/OB: subgroup of women with overweight/obesity.


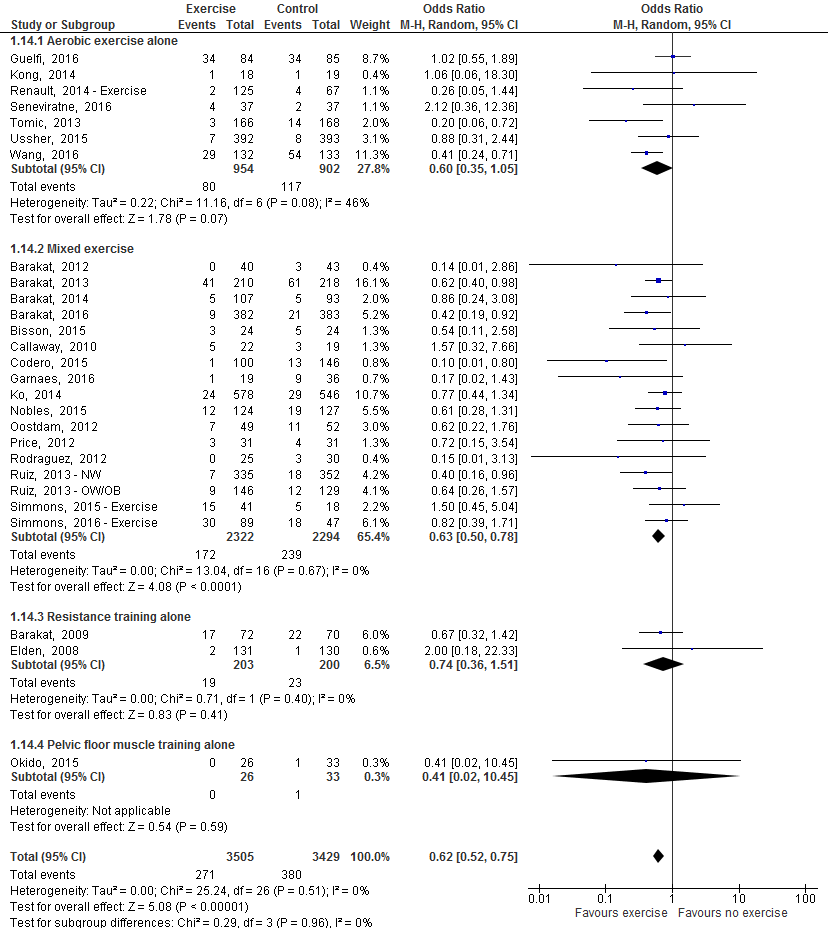


Online Supplement Figure 4: Effects of prenatal exercise-only interventions (RCTs) compared with control on odds of gestational diabetes mellitus. Subgroup analyses were conducted with studies including aerobic exercise alone, and with those including resistance training alone, pelvic floor muscule training alone, or mixed exercise (combinations of different types of exercise). Analyses conducted with a random effects model. CI, confidence interval; df, degrees of freedom; M-H, Mantel-Haenszel method. NW: subgroup of normal weight women; OW/OB: subgroup of women with overweight/obesity.


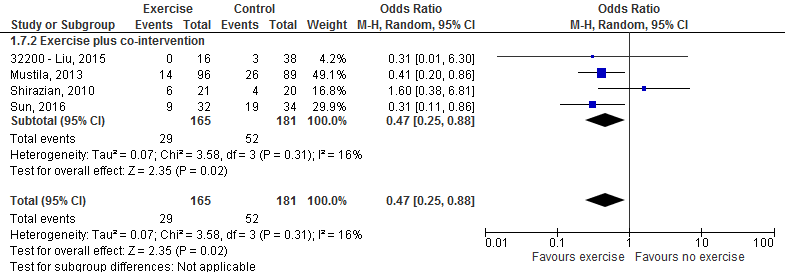


Online Supplement Figure 5: Effects of prenatal exercise+co-interventions compared with control on odds of gestational diabetes mellitus (non-randomized interventions). Analyses conducted with a random effects model. CI, confidence interval; df, degrees of freedom; M-H, Mantel-Haenszel method.


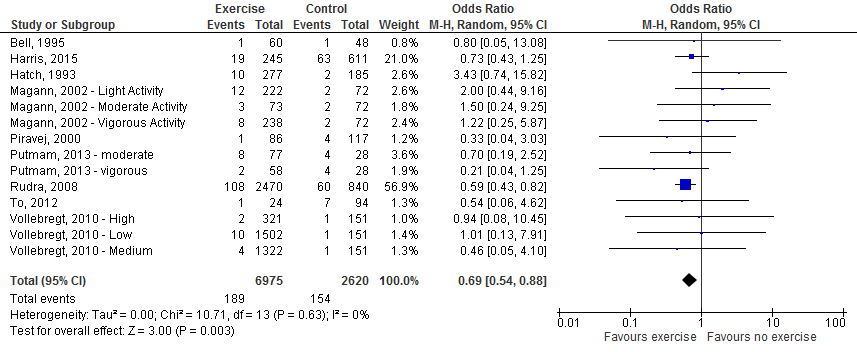


Online Supplement Figure 6: Effects of prenatal exercise compared with control on odds of gestational diabetes mellitus (cohort studies). Analyses conducted with a random effects model. CI, confidence interval; df, degrees of freedom; M-H, Mantel-Haenszel method.


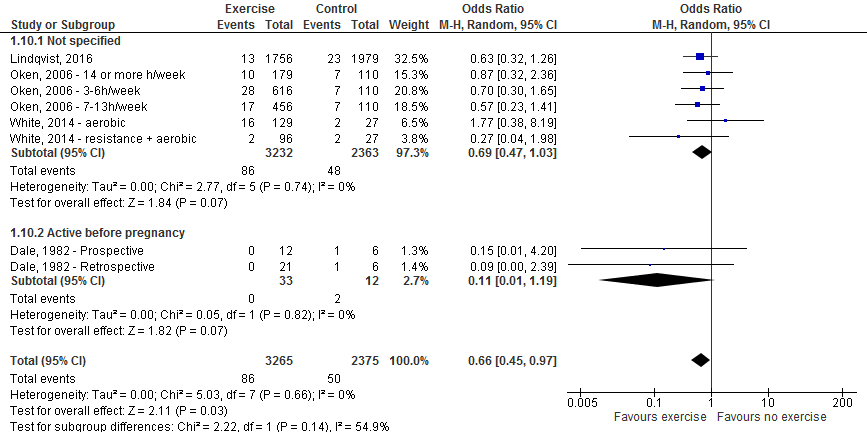


Online Supplement Figure 7: Effects of prenatal exercise compared with control on odds of gestational diabetes mellitus (cross-sectional studies). Analyses conducted with a random effects model. CI, confidence interval; df, degrees of freedom; M-H, Mantel-Haenszel method. Subgroup analyses were conducted with studies not specifying previous physical activity levels of the women and with those including women who were previously active.


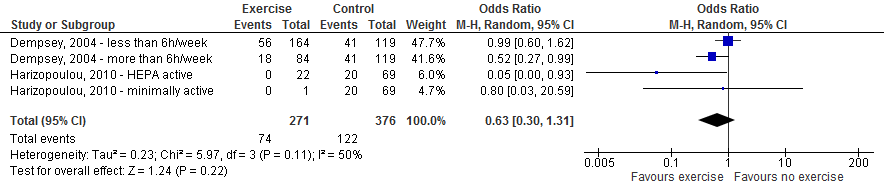


Online Supplement Figure 8: Effects of prenatal exercise compared with control on odds of gestational diabetes mellitus (case-control studies). Analyses conducted with a random effects model. CI, confidence interval; df, degrees of freedom; M-H, Mantel-Haenszel method.


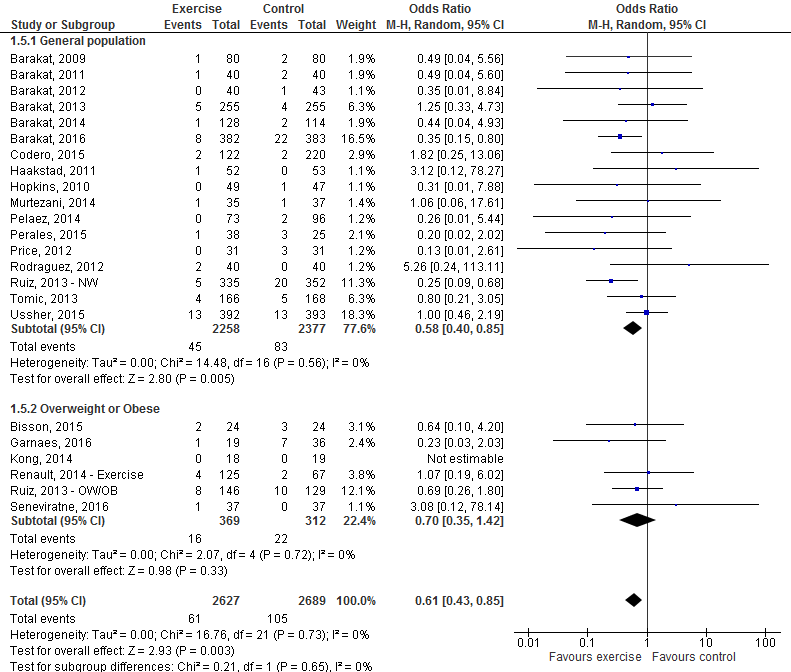


Online Supplement Figure 9: Effects of prenatal exercise-only interventions compared with control on odds of gestational hypertension (RCTs). Subgroup analyses were conducted with studies including women of all body weight status (defined as “general population”) and with those including women with overweight/obesity. Analyses conducted with a random effects model. CI, confidence interval; df, degrees of freedom; M-H, Mantel-Haenszel method. NW: subgroup of normal weight women; OW/OB: subgroup of women with overweight/obesity. *Note: studies with zero events in both groups are included in the forest plot but are "not estimable" and not included in the pooled analysis.*


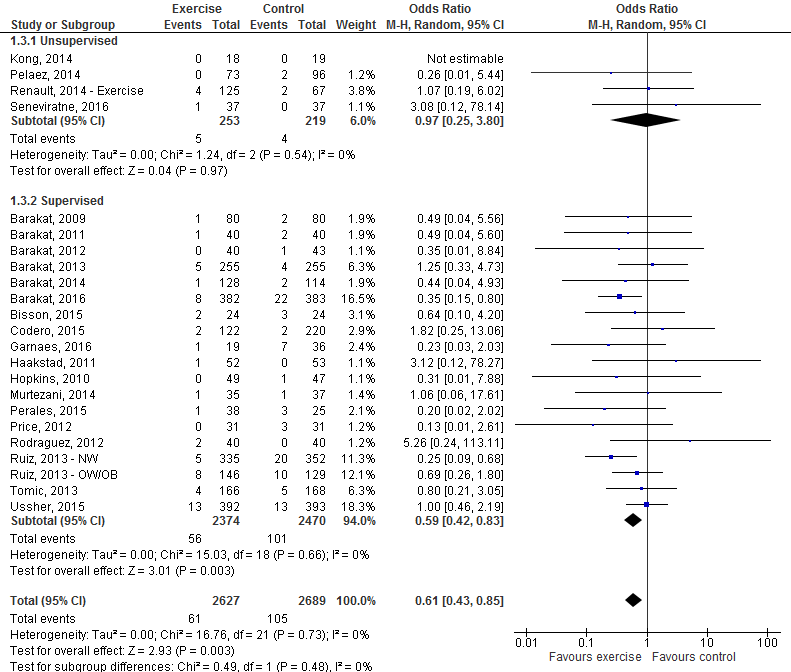


Online Supplement Figure 10: Effects of prenatal exercise-only interventions compared with control on odds of gestational hypertension (RCTs). Subgroup analyses were conducted with studies including unsupervised exercise and with those including supervised exercise. CI, confidence interval; df, degrees of freedom; M-H, Mantel-Haenszel method. NW: subgroup of normal weight women; OW/OB: subgroup of women with overweight/obesity. *Note: studies with zero events in both groups are included in the forest plot but are "not estimable" and not included in the pooled analysis.*


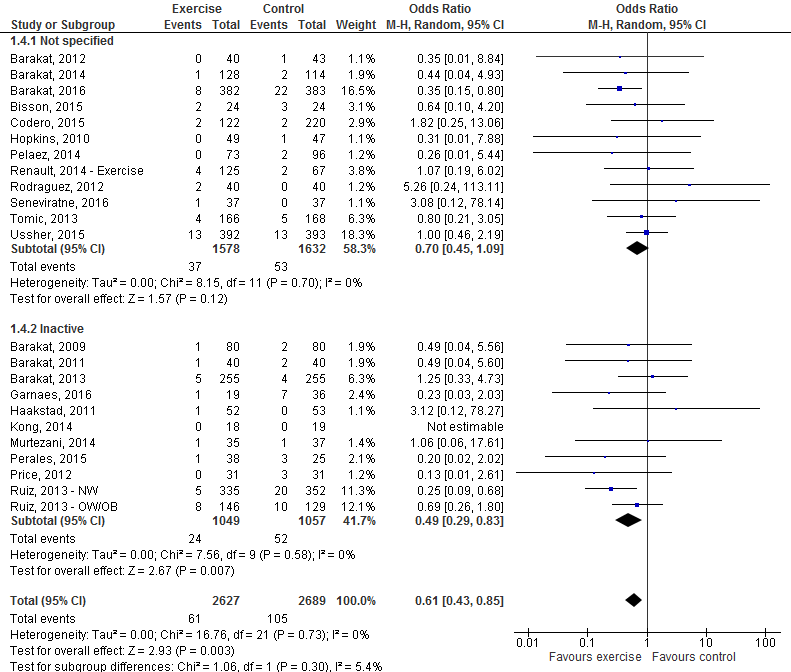


Online Supplement Figure 11: Effects of prenatal exercise-only interventions compared with control on odds of gestational hypertension (RCTs). Subgroup analyses were conducted with studies not specifying previous physical activity levels of the women and with those including women who were previously inactive. Analyses conducted with a random effects model. CI, confidence interval; df, degrees of freedom; M-H, Mantel-Haenszel method. NW: subgroup of normal weight women; OW/OB: subgroup of women with overweight/obesity. *Note: studies with zero events in both arms are included in the forest plot but are "not estimable" and not included in the pooled analysis.*


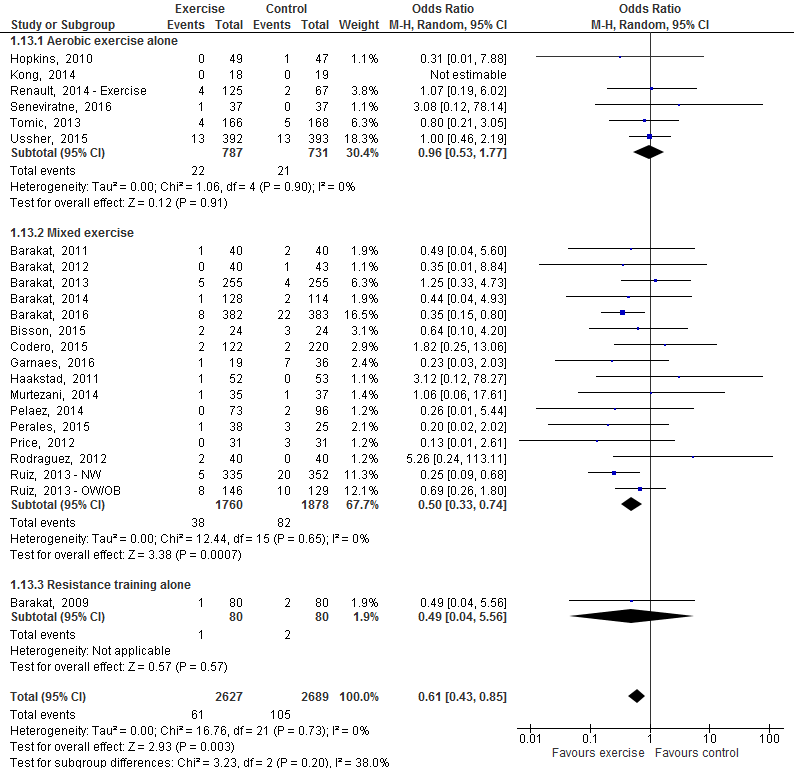


Online Supplement Figure 12: Effects of prenatal exercise-only interventions (RCTs) compared with control on odds of gestational hypertension. Subgroup analyses were conducted with studies including aerobic exercise alone and with those including resistance training alone, or mixed exercise (combinations of different types of exercise). Analyses conducted with a random effects model. CI, confidence interval; df, degrees of freedom; M-H, Mantel-Haenszel method. NW: subgroup of normal weight women; OW/OB: subgroup of women with overweight/obesity.


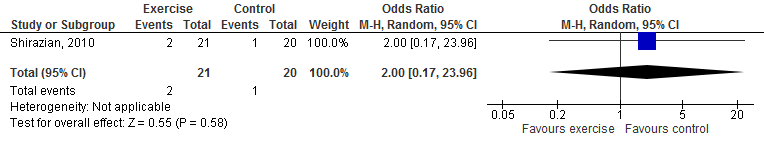


Online Supplement Figure 13: Effects of prenatal exercise+co-intervention compared with control on odds of gestational hypertension (non-randomized intervention). Analyses conducted with a random effects model. CI, confidence interval; df, degrees of freedom; M-H, Mantel-Haenszel method


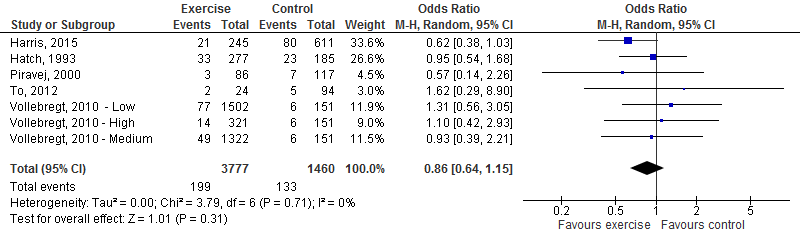


Online Supplement Figure 14: Effects of prenatal exercise compared with control on odds of gestational hypertension (cohort studies). Analyses conducted with a random effects model. CI, confidence interval; df, degrees of freedom; M-H, Mantel-Haenszel method.


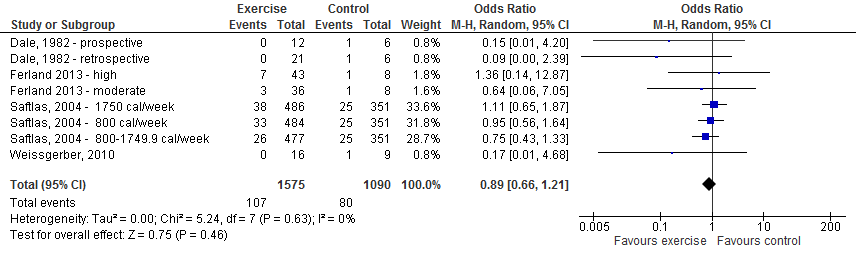


Online Supplement Figure 15: Effects of prenatal exercise compared with control on odds of gestational hypertension (cross-sectional studies). Analyses conducted with a random effects model. CI, confidence interval; df, degrees of freedom; M-H, Mantel-Haenszel method.


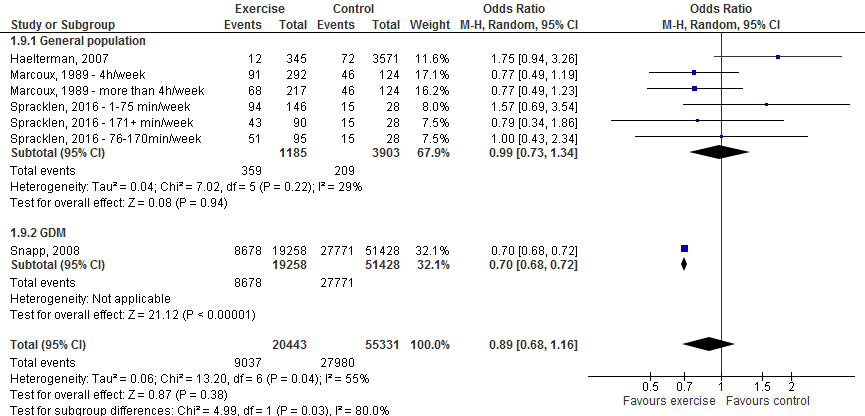


Online Supplement Figure 16: Effects of prenatal exercise compared with control on odds of gestational hypertension (case-control studies). Analyses conducted with a random effects model. CI, confidence interval; df, degrees of freedom; M-H, Mantel-Haenszel method. Subgroup analyses were conducted with studies including non-GDM women (defined as “general population”) and with those including GDM women.


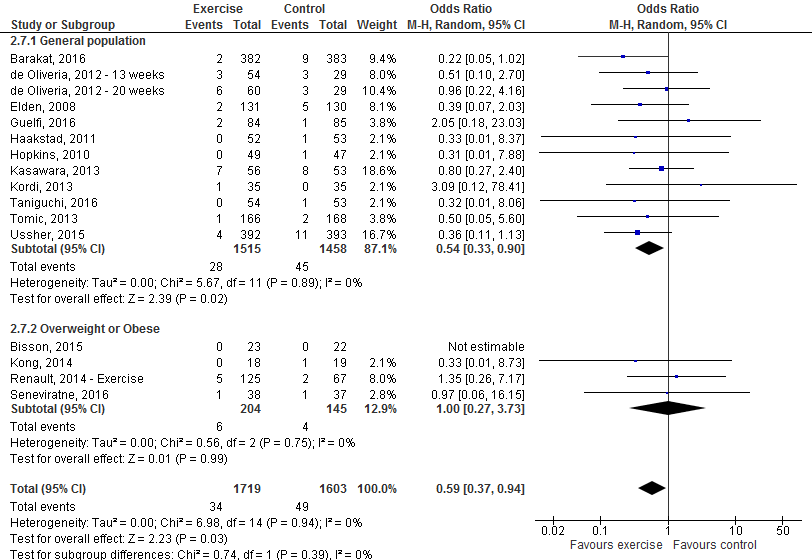


Online Supplement Figure 17: Effects of prenatal exercise-only interventions compared with control on odds of preeclampsia (RCTs). Subgroup analyses were conducted with studies including women of all body weight status (defined as “general population”) and with those including women with overweight/obesity. Analyses conducted with a random effects model. CI, confidence interval; df, degrees of freedom; M-H, Mantel-Haenszel method. 13 weeks: subgroup of women who initiated exercise at 13 weeks of pregnancy; 20 weeks: subgroup of women who initiated exercise at 20 weeks of pregnancy. *Note: studies with zero events in both arms are included in the forest plot but are "not estimable" and not included in the pooled analysis.*


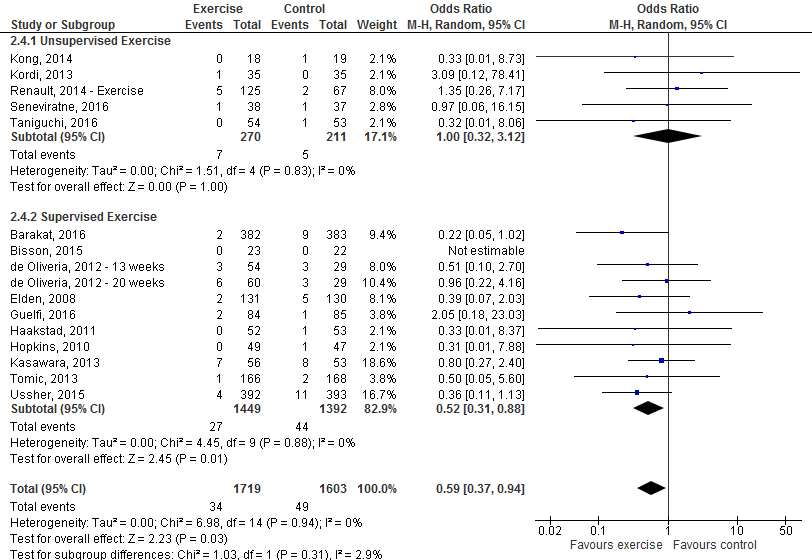


Online Supplement Figure 18: Effects of prenatal exercise-only interventions compared with control on odds of preeclampsia (RCTs). Subgroup analyses were conducted with studies including supervised exercise and with those including unsupervised exercise. Analyses conducted with a random effects model. CI, confidence interval; df, degrees of freedom; M-H, Mantel-Haenszel method. 13 weeks: subgroup of women who initiated exercise at 13 weeks of pregnancy; 20 weeks: subgroup of women who initiated exercise at 20 weeks of pregnancy. *Note: studies with zero events in both arms are included in the forest plot but are "not estimable" and not included in the pooled analysis.*


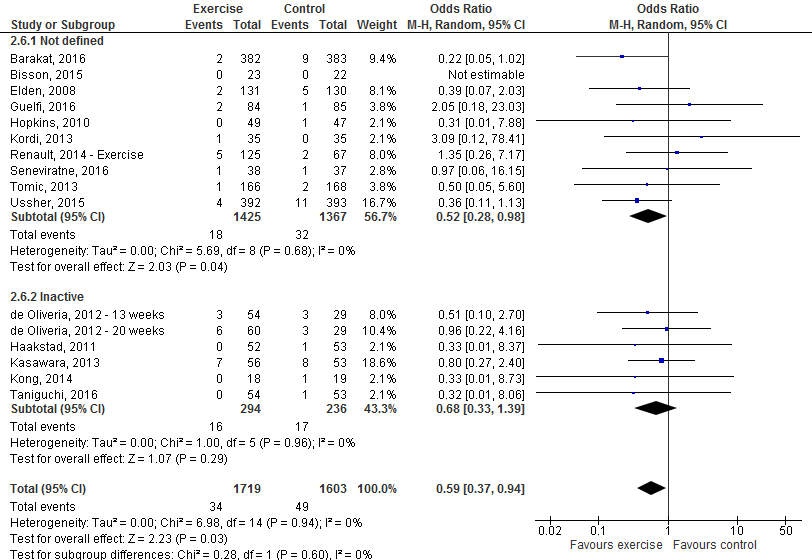


Online Supplement Figure 19: Effects of prenatal exercise-only interventions compared with control on odds of preeclampsia (RCTs). Subgroup analyses were conducted with studies not specifying previous physical activity levels of the women and with those including women who were previously inactive. CI, confidence interval; df, degrees of freedom; M-H, Mantel-Haenszel method. 13 weeks: subgroup of women who initiated exercise at 13 weeks of pregnancy; 20 weeks: subgroup of women who initiated exercise at 20 weeks of pregnancy. *Note: studies with zero events in both arms are included in the forest plot but are "not estimable" and not included in the pooled analysis.*


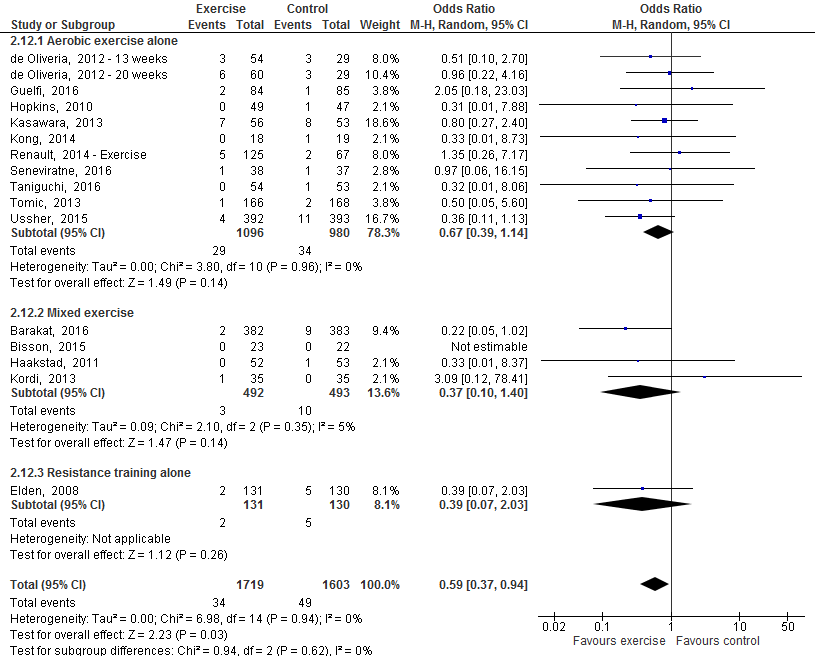


Online Supplement Figure 20: Effects of prenatal exercise-only interventions (RCTs) compared with control on odds of preeclampsia. Subgroup analyses were conducted with studies including aerobic exercise alone and with those including resistance training alone, or mixed exercise (combinations of different types of exercise). Analyses conducted with a random effects model. CI, confidence interval; df, degrees of freedom; M-H, Mantel-Haenszel method. NW: subgroup of normal weight women; OW/OB: subgroup of women with overweight/obesity.


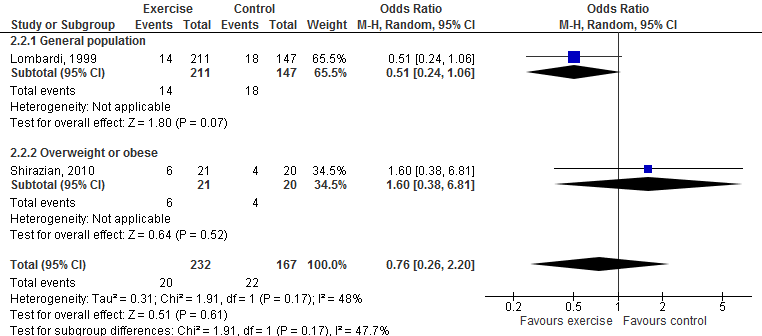


Online Supplement Figure 21: Effects of prenatal exercise+co-interventions compared with control on odds of preeclampsia (non-randomized interventions). Analyses conducted with a random effects model. CI, confidence interval; df, degrees of freedom; M-H, Mantel-Haenszel method. Subgroup analyses were conducted with studies including women of all body weight status (defined as “general population”) and with those including women with overweight/obesity.


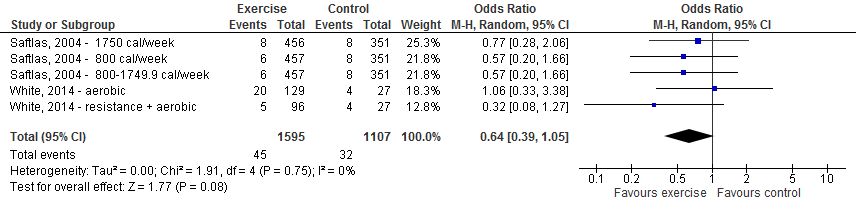


Online Supplement Figure 22: Effects of prenatal exercise compared with control on odds of preeclampsia (cross-sectional studies). Analyses conducted with a random effects model. CI, confidence interval; df, degrees of freedom; M-H, Mantel-Haenszel method.


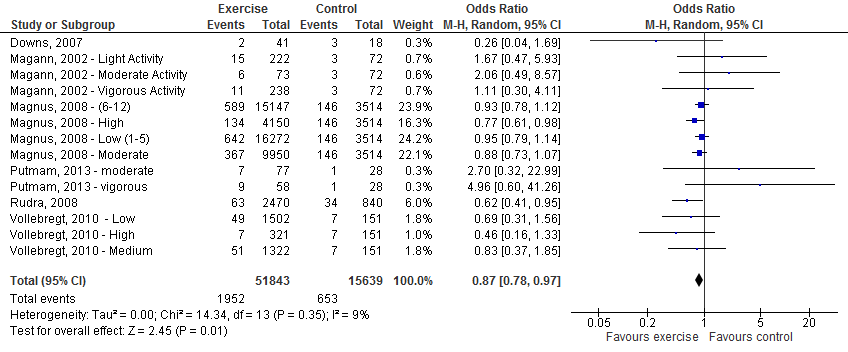


Online Supplement Figure 23: Effects of prenatal exercise compared with control on odds of preeclampsia (cohort studies). Analyses conducted with a random effects model. CI, confidence interval; df, degrees of freedom; M-H, Mantel-Haenszel method


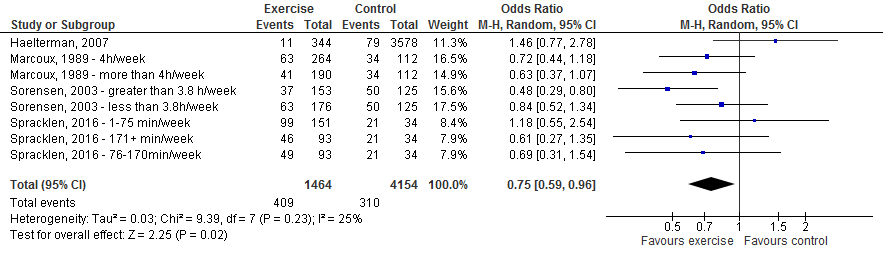


Online Supplement Figure 24: Effects of prenatal exercise compared with control on odds of preeclampsia (case-control studies). Analyses conducted with a random effects model. CI, confidence interval; df, degrees of freedom; M-H, Mantel-Haenszel method.


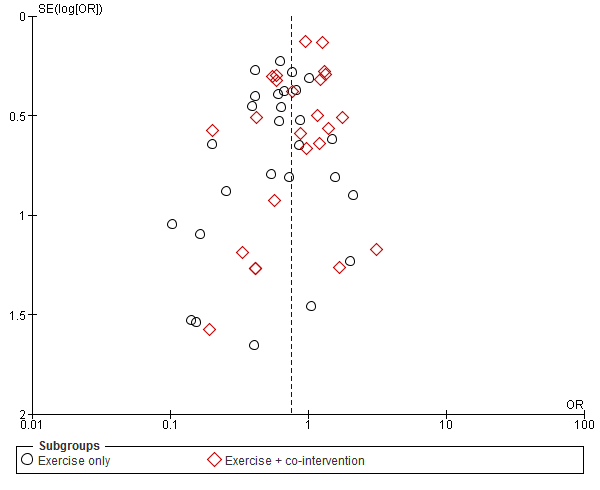


Online Supplement Figure 25: Funnel plot of the meta-analysis of published prenatal exercise-only and exercise+co-interventions on odds of gestational diabetes mellitus (RCTs). Each plotted point represents the standard error and odds ratio between intervention and control group for a single study. The vertical line represents the average odds ratio of 0.76 found in the meta-analysis.


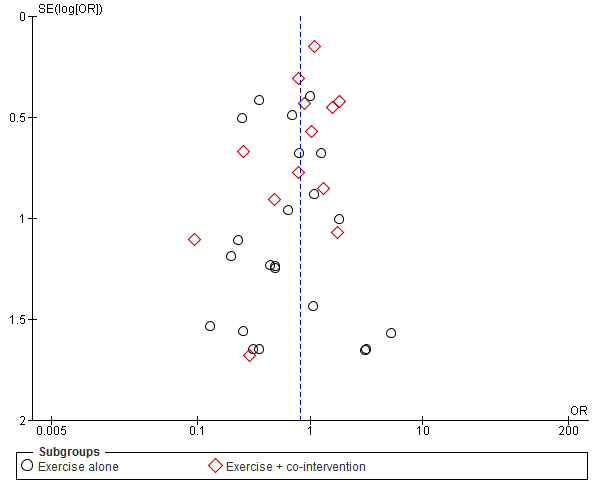


Online Supplement Figure 26: Funnel plot of the meta-analysis of published prenatal exercise-only and exercise+co-interventions on odds of gestational hypertension (RCTs). Each plotted points represents the standard error and odds ratio between intervention and control group for a single study. The vertical line represents the average odds ratio of 0.81 found in the meta-analysis.


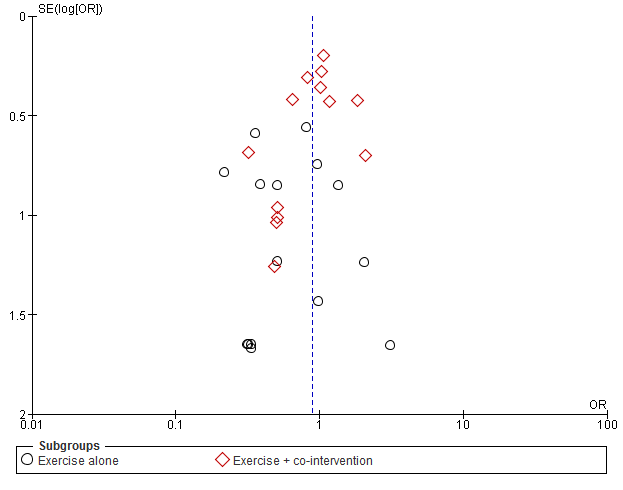


Online Supplement Figure 27: Funnel plot of the meta-analysis of published prenatal exercise-only and exercise+co-interventions on odds of preeclampsia (RCTs). Each plotted points represents the standard error and odds ratio between intervention and control group for a single study. The vertical line represents the average odds ratio of 0.89 found in the meta-analysis.

Online Supplement Figure 28: Linear and Spline regression of exercise-only randomized controlled trials examining the duration of exercise session on risk of Gestational Diabetes Mellitus. Black line, line of best fit; red line, odds ratio of 1.0; green line, 25% reduction in the odds of developing gestational diabetes mellitus. Circle size is related to the weight of the study in the regression.

Online Supplement Figure 29: Linear and Spline regression of exercise-only randomized controlled trials examining the duration of exercise per week risk of Gestational Diabetes Mellitus. Black line, line of best fit; red line, odds ratio of 1.0; green line, 25% reduction in the odds of developing gestational diabetes mellitus. Circle size is related to the weight of the study in the regression.

Online Supplement Figure 30: Linear and Spline regression of exercise-only randomized controlled trials examining the frequency of exercise per week risk of Gestational Diabetes Mellitus. Black line, line of best fit; red line, odds ratio of 1.0; green line, 25% reduction in the odds of developing gestational diabetes mellitus. Circle size is related to the weight of the study in the regression.

##

Online Supplement Figure 31: Linear and Spline regression of exercise-only randomized controlled trials examining the volume of exercise per week (MET minutes per week) on risk of Gestational Diabetes Mellitus. Black line, line of best fit; red line, odds ratio of 1.0; green line, 25% reduction in the odds of developing gestational diabetes mellitus. Circle size is related to the weight of the study in the regression.

Online Supplement Figure 32: Linear and Spline regression of exercise-only randomized controlled trials examining the intensity of exercise on risk of Gestational Diabetes Mellitus. Black line, line of best fit; red line, odds ratio of 1.0; green line, 25% reduction in the odds of developing gestational diabetes mellitus. Circle size is related to the weight of the study in the regression.

Online Supplement Figure 33: Linear and Spline regression of exercise-only randomized controlled trials examining the duration of exercise session on risk of Gestational Hypertension. Black line, line of best fit; red line, odds ratio of 1.0; green line, 25% reduction in the odds of developing gestational hypertension. Circle size is related to the weight of the study in the regression.

Online Supplement Figure 34: Linear and Spline regression of exercise-only randomized controlled trials examining the duration of exercise per week on risk of Gestational Hypertension. Black line, line of best fit; red line, odds ratio of 1.0; green line, 25% reduction in the odds of developing gestational hypertension. Circle size is related to the weight of the study in the regression.

Online Supplement Figure 35: Linear and Spline regression of exercise-only randomized controlled trials examining the frequency of exercise per week on risk of Gestational Hypertension. Black line, line of best fit; red line, odds ratio of 1.0; green line, 25% reduction in the odds of developing gestational hypertension. Circle size is related to the weight of the study in the regression.

## df AIC BIC AICc logLik LRT pval QE tau^2 R^2
## Full 3 64.3950 67.6682 65.7284 -29.1975 15.3922 0.0241
## Reduced 2 62.4754 64.6575 63.1070 -29.2377 0.0804 0.7768 15.4731 0.0240 0.00%

Online Supplement Figure 36: Linear and Spline regression of exercise-only randomized controlled trials examining the volume of exercise per week (MET minutes per week) on risk of Gestational Hypertension. Black line, line of best fit; red line, odds ratio of 1.0; green line, 25% reduction in the odds of developing gestational hypertension. Circle size is related to the weight of the study in the regression.

Online Supplement Figure 37: Linear and Spline regression of exercise-only randomized controlled trials examining the impact of exercise intensity (METs) on risk of Gestational Hypertension. Black line, line of best fit; red line, odds ratio of 1.0; green line, 25% reduction in the odds of developing gestational hypertension. Circle size is related to the weight of the study in the regression.

Online Supplement Figure 38: Linear and Spline regression of exercise-only randomized controlled trials examining the duration of exercise per session on risk of Preeclampsia. Black line, line of best fit; red line, odds ratio of 1.0; green line, 25% reduction in the odds of developing preeclampsia. Circle size is related to the weight of the study in the regression.

Online Supplement Figure 39: Linear and Spline regression of exercise-only randomized controlled trials examining the duration of exercise per week on risk of Preeclampsia. Black line, line of best fit; red line, odds ratio of 1.0; green line, 25% reduction in the odds of developing preeclampsia. Circle size is related to the weight of the study in the regression.

Online Supplement Figure 40: Linear and Spline regression of exercise-only randomized controlled trials examining the frequency of exercise per week on risk of Preeclampsia. Black line, line of best fit; red line, odds ratio of 1.0; green line, 25% reduction in the odds of developing preeclampsia. Circle size is related to the weight of the study in the regression.

Online Supplement Figure 41: Linear and Spline regression of exercise-only randomized controlled trials examining the volume of exercise per week (MET minutes per week) on risk of Preeclampsia. Black line, line of best fit; red line, odds ratio of 1.0; green line, 25% reduction in the odds of developing preeclampsia. Circle size is related to the weight of the study in the regression.

Online Supplement Figure 42: Linear and Spline regression of exercise-only randomized controlled trials examining the volume of exercise per week (METs) on risk of Preeclampsia. Black line, line of best fit; red line, odds ratio of 1.0; green line, 25% reduction in the odds of developing preeclampsia. Circle size is related to the weight of the study in the regression.

**4) Search strategies**

The following databases were searched on January 6th, 2017:

- Ovid MEDLINE(R) In-Process & Other Non-Indexed Citations, Ovid MEDLINE(R) Daily and Ovid MEDLINE(R)
- Ovid EMBASE
- Ovid All EBM [Evidence-Based Medicine] Reviews: Cochrane Database of Systematic and Cochrane Central Register of Controlled Trials
- Ovid PsycInfo 1806-Present
- EBSCO CINAHL Plus with Full-text, 1937-Present
- EBSCO Sport Discus with Full-text. 1975-Present
- EBSCO ERIC, 1966-Present
- EBSCO Child Development and Adolescent Studies, 1927-Present
- Scopus, 1960-Present
- Web of Science Core Collection (including Emerging Sources Citation Index) , 1900-Present
- Clinicaltrials.gov

*Maternal Outcomes Strategy*

MEDLINE

1. exp Exercise/ or Athletes/ or exp Exercise Movement Techniques/ or Physical Exertion/ or exp Exercise Therapy/ or exp Sports/ or Motor Activity/ or Sedentary Lifestyle/ or (exercise or physical* activ* or strenuous activit* or physical* inactiv* or sedentary or running or plyometric* or yoga or tai chi or weight training or resistance training or swim* or sport* or athlet* or walk or walking or mvpa or ltpa or stretching or aerobic capacity).ti,kf. or exercise.ab. /freq=2 or physical* activ*.ab. /freq=2 or (weight* adj2 lift*).ti,kf. or ((muscle or muscular or strength*) adj2 conditioning).ti,kf.

2. exp Pregnancy Complications/ or Pregnancy Outcome/ or exp Labor, Obstetric/ or exp Delivery, Obstetric/ or exp Extraction, Obstetrical/ or pregnan*.ti,hw,kf.

3. ((birth or pregnancy or childbirth) adj3 (outcome* or complication*)).mp.

4. (((spontaneous or induc* or onset or length) adj3 (labor or labour)) or c?esarean).mp.

5. (episiotom* or vaginal delivery or gestational diabetes or pre-eclampsia or preeclampsia or gestosis).mp.

6. (((normal or instrumental or assisted) adj2 (delivery or birth or childbirth)) or (forceps or ventouse or vacuum extraction)).mp.

7. ((mode of delivery or type of delivery) and (pregnan* or birth or childbirth or obstetric* or labor or labour)).mp.

8. ((tear* or ruptur* or hemorrhage*) adj2 (placent* or vagin* or membran* or periton*)).mp.

9. (miscarriage* or spontaneous abortion*).mp.

10. or/2-9

11. 1 and 10

12. Pregnancy/ or pregnan*.ti,hw,kf. or exp Pregnancy Trimesters/ or Peripartum Period/ or Postpartum Period/ or (antenatal or prenatal or perinatal or postnatal or prepartum or antepartum or postpartum or pre partum or ante partum or post partum or puerper* or primigravid* or primiparous or multiparous or nulliparous or multigravid* or trimester* or obstetric*).ti,kf.

13. 1 and 12

14. ((pregnan* or antenatal or prenatal or perinatal or postnatal or prepartum or antepartum or postpartum or pre partum or ante partum or post partum or puerper*) adj5 (exercise or physical* activ* or strenuous activit* or physical inactiv* or sedentary or running or plyometric* or yoga or tai chi or weight training or resistance training or (weight* adj2 lift*) or swim* or sport* or athlet* or walk or walking or ((muscle or muscular or strength*) adj2 conditioning))).ab.

15. 13 or 14

16. exp Insulins/ or diabetes mellitus/ or exp diabetes mellitus, type 1/ or exp diabetes mellitus, type 2/ or diabetes, gestational/ or prediabetic state/ or hemoglobin a, glycosylated/ or (insulin or glucose or glyc?emic control or blood sugar or diabet* or prediabet* or hba1c or glycosylated h?emoglobin or hyperglyc?emi* or hypoglyc?emi* or (weight adj3 (gain* or change* or loss or lose or retention)) or bmi or body mass index or body composition or skinfold thickness or ((hip or waist) adj2 ratio) or ((waist or abdominal) adj2 circumference) or overweight or obes* or adipos* or underweight or normal weight or healthy weight or hypertension or hypotension or fainting or syncope or lightheaded* or light headed* or dizziness or blood pressure or tox?emi* or eph complex or proteinuria or edema or hemodynamic* or haemodynamic* or systolic or diastolic or cardiovascular or cardiometabolic or cardio-metabolic or metabolic or heart or cardio* or cardiac or lipid* or placental growth factor* or triglyceride* or ldl or hdl or lipoprotein or cholesterol).mp.

17. dehydration/ or exp Cardiovascular Diseases/ or (dehydrat* or heart disease* or cardiovascular disease*).mp.

18. adaptation, physiological/ or body temperature regulation/

19. Physical Fitness/ or exp Physical Endurance/ or me.fs. or (safe* or harm* or risk* or fitness or aerobic capacity or oxygen consumption or vo2 max or vo2max or vo2 peak or vo2peak or frequency or intensity or duration or dose response or fitt or zone or (type* adj2 exercise)).mp.

20. exp Chronic disease/ or exp Osteoporosis/ or exp Urinary Incontinence/ or (chronic disease* or chronic illness* or osteoporosis or incontinen*).mp.

21. exp Back Pain/ or Pelvic Pain/ or Muscle Cramp/ or (Pain/ and exp Hip Joint/) or ((hip or back or pelvic or pelvis) adj3 (pain or discomfort or ache)).mp. or cramp*.mp.

22. Mental Health/ or exp Mental Disorders/ or Body Image/ or Self Concept/ or (mental health or mental disorder* or mental illness* or mental disease* or depression or depressive or mood or anxiety or well being or wellbeing or wellness or body image or self perception).mp.

23. (postur* or supine or valsalva or diastasis recti or rectus abdominis or inter rectus distance or interrectus distance).mp.

24. Fatigue/ or (fatigue or exhaustion or injur* or trauma).mp.

25. or/16-24

26. 15 and 25

27. 11 or 26

28. limit 27 to medline

29. animals/ not (animals/ and humans/)

30. 28 not 29

31. 27 not 28

32. ((rat or rats or mouse or mice or cow or cows or bovine or sheep or ewe*) not ((rat or rats or mouse or mice or cow or cows or bovine or sheep or ewe*) and (human* or women))).ti,ab,kf.

33. 31 not 32

34. 30 or 33

35. remove duplicates from 34

EMBASE

1. exp *exercise/ or *athlete/ or exp *kinesiotherapy/ or exp *sport/ or exp *physical activity/ or *sedentary lifestyle/ or (exercise or physical* activ* or physical* inactiv* or sedentary or running or plyometric* or yoga or tai chi or weight training or resistance training or swim* or sport* or athlet* or walk or walking or mvpa or ltpa or stretching or aerobic capacity).ti,kw. or exercise.ab. /freq=2 or physical* activ*.ab. /freq=2 or (weight* adj2 lift*).ti,kw. or ((muscle or muscular or strength*) adj2 conditioning).ti,kw.

2. exp pregnancy complication/ or pregnancy outcome/ or exp labor/ or exp delivery/ or pregnan*.ti,kw.

3. ((birth or pregnancy or childbirth) adj3 (outcome* or complication*)).mp.

4. (((spontaneous or induc* or onset or length) adj3 (labor or labour)) or c?esarean).mp.

5. (episiotom* or vaginal delivery or gestational diabetes or pre-eclampsia or preeclampsia or gestosis).mp.

6. (((normal or instrumental or assisted) adj2 (delivery or birth or childbirth)) or (forceps or ventouse or vacuum extraction)).mp.

7. ((mode of delivery or type of delivery) and (pregnan* or birth or childbirth or obstetric* or labor or labour)).mp.

8. ((tear* or ruptur* or hemorrhage*) adj2 (placent* or vagin* or membran* or periton*)).mp.

9. (miscarriage* or spontaneous abortion*).mp.

10. or/2-9

11. 1 and 10

12. Pregnancy/ or pregnan*.ti,hw,kw. or exp Pregnancy Trimesters/ or Peripartum Period/ or Postpartum Period/ or (antenatal or prenatal or perinatal or postnatal or prepartum or antepartum or postpartum or pre partum or ante partum or post partum or puerper* or primigravid* or primiparous or multiparous or nulliparous or multigravid* or trimester* or obstetric*).ti,kw.

13. 1 and 12

14. ((pregnan* or maternal or antenatal or prenatal or perinatal or postnatal or prepartum or antepartum or postpartum or pre partum or ante partum or post partum or puerper*) adj5 (exercise or physical* activ* or strenuous activit* or physical* inactiv* or sedentary or running or plyometric* or yoga or tai chi or weight training or resistance training or (weight* adj2 lift*) or swim* or sport* or athlet* or walk or walking or mvpa or ltpa or stretching or aerobic capacity or fitness or ((muscle or muscular or strength*) adj2 conditioning))).ab.

15. 13 or 14

16. exp insulin/ or exp diabetes mellitus/ or glycosylated hemoglobin/ or (insulin or glucose or glyc?emic control or blood sugar or diabet* or prediabet* or hba1c or glycosylated h?emoglobin or hyperglyc?emi* or hypoglyc?emi* or (weight adj3 (gain* or change* or loss or lose or retention)) or bmi or body mass index or body composition or skinfold thickness or ((hip or waist) adj2 ratio) or ((waist or abdominal) adj2 circumference) or overweight or obes* or adipos* or underweight or normal weight or healthy weight or hypertension or hypotension or fainting or syncope or lightheaded* or light headed* or dizziness or blood pressure or tox?emi* or eph complex or proteinuria or edema or hemodynamic* or haemodynamic* or systolic or diastolic or cardiovascular or cardiometabolic or cardio-metabolic or metabolic or heart or cardio* or cardiac or lipid* or placental growth factor* or triglyceride* or ldl or hdl or lipoprotein or cholesterol).mp.

17. dehydration/ or exp cardiovascular disease/ or (dehydrat* or heart disease* or cardiovascular disease*).mp.

18. adaptation/ or exp thermoregulation/ or fitness/ or endurance/ or (safe* or harm* or risk* or fitness or aerobic capacity or oxygen consumption or vo2 max or vo2max or vo2 peak or vo2peak or frequency or intensity or duration or dose response or fitt or zone or (type* adj2 exercise)).mp.

19. exp backache/ or exp pelvic pain/ or hip pain/ or muscle cramp/ or heat cramp/ or leg cramp/ or ((hip or back or pelvic or pelvis) adj3 (pain or discomfort or ache)).mp. or cramp*.mp.

20. mental health/ or psychological well being/ or exp mental disease/ or body image/ or self concept/ or (mental health or mental disorder* or mental illness* or mental disease* or depression or depressive or mood or anxiety or well being or wellbeing or wellness or body image or self perception).mp.

21. (postur* or supine or valsalva or diastasis recti or rectus abdominis or inter rectus distance or interrectus distance).mp.

22. fatigue/ or exhaustion/ or (fatigue or exhaustion or injur* or trauma or blood loss).mp.

23. chronic disease/ or exp osteoporosis/ or exp urine incontinence/ or (chronic disease* or chronic illness* or osteoporosis or incontinen*).mp.

24. or/16-23

25. 15 and 24

26. 11 or 25

27. exp animal/ not (exp animal/ and human/)

28. 26 not 27

29. remove duplicates from 28

PsycInfo

1. physical activity/ or exp exercise/ or activity level/ or athletes/ or exp sports/ or ((exercise or physical* activ* or strenuous activit* or physical* inactiv* or sedentary or running or plyometric* or yoga or tai chi or weight training or resistance training or swim* or sport* or athlet* or walk or walking or mvpa or ltpa or stretching or aerobic capacity).ti,ab,id. or ((weight* adj2 lift*) or ((muscle or muscular or strength*) adj2 conditioning))).ti,ab,id.

2. obstetrical complications/ or pregnancy outcomes/ or spontaneous abortion/ or "labor (childbirth)"/ or birth/

3. (pregnan* or ((birth or pregnancy or childbirth) adj3 (outcome* or complication*))).mp.

4. (((spontaneous or induc* or onset or length) adj3 (labor or labour)) or c?esarean).mp.

5. (episiotom* or vaginal delivery or gestational diabetes or pre-eclampsia or preeclampsia or gestosis).mp.

6. (((normal or instrumental or assisted) adj2 (delivery or birth or childbirth)) or (forceps or ventouse or vacuum extraction)).mp.

7. ((mode of delivery or type of delivery) and (pregnan* or birth or childbirth or obstetric* or labor or labour)).mp.

8. ((tear* or ruptur* or hemorrhage*) adj2 (placent* or vagin* or membran* or periton*)).mp.

9. (miscarriage* or spontaneous abortion*).mp.

10. or/2-9

11. 1 and 10

12. exp pregnancy/ or pregnan*.ti,hw,id. or (antenatal or prenatal or perinatal or postnatal or prepartum or antepartum or postpartum or primigravid* or primiparous or multiparous or nulliparous or multigravid* or trimester* or obstetric*).ti,id.

13. 1 and 12

14. ((pregnan* or antenatal or prenatal or perinatal or postnatal or prepartum or antepartum or postpartum or pre partum or ante partum or post partum or puerper*) adj5 (exercise or physical* activ* or strenuous activit* or physical inactiv* or sedentary or running or plyometric* or yoga or tai chi or weight training or resistance training or (weight* adj2 lift*) or swim* or sport* or athlet* or walk or walking or ((muscle or muscular or strength*) adj2 conditioning))).ab.

15. 13 or 14

16. insulin/ or diabetes/ or diabetes mellitus/ or (insulin or glucose or glyc?emic control or blood sugar or diabet* or prediabet* or hba1c or glycosylated h?emoglobin or hyperglyc?emi* or hypoglyc?emi* or (weight adj3 (gain* or change* or loss or lose or retention)) or bmi or body mass index or body composition or skinfold thickness or ((hip or waist) adj2 ratio) or ((waist or abdominal) adj2 circumference) or overweight or obes* or adipos* or underweight or normal weight or healthy weight or hypertension or hypotension or fainting or syncope or lightheaded* or light headed* or dizziness or blood pressure or tox?emi* or eph complex or proteinuria or edema or hemodynamic* or haemodynamic* or systolic or diastolic or cardiovascular or cardiometabolic or cardio-metabolic or metabolic or heart or cardio* or cardiac or lipid* or placental growth factor* or triglyceride* or ldl or hdl or lipoprotein or cholesterol).mp.

17. dehydration/ or exp Cardiovascular Disorders/ or (dehydrat* or heart disease* or cardiovascular disease*).mp.

18. "thermoregulation (body)"/ or physical fitness/ or physical endurance/ or (safe* or harm* or risk* or fitness or aerobic capacity or oxygen consumption or vo2 max or vo2max or vo2 peak or vo2peak or frequency or intensity or duration or dose response or fitt or zone or (type* adj2 exercise)).mp.

19. back pain/ or ((hip or back or pelvic or pelvis) adj3 (pain or discomfort or ache)).mp. or cramp*.mp.

20. mental health/ or exp Mental Disorders/ or exp body image/ or self concept/ or (mental health or mental disorder* or mental illness* or mental disease* or depression or depressive or mood or anxiety or well being or wellbeing or wellness or body image or self perception).mp.

21. (postur* or supine or valsalva or diastasis recti or rectus abdominis or inter rectus distance or interrectus distance).mp.

22. fatigue/ or (fatigue or exhaustion or injur* or trauma).mp.

23. Physical Fitness/ or exp Physical Endurance/ or (safe* or harm* or risk* or fitness or aerobic capacity or oxygen consumption or vo2 max or vo2max or vo2 peak or vo2peak or frequency or intensity or duration or dose response or fitt or zone or (type* adj2 exercise)).mp.

24. chronic illness/ or osteoporosis/ or urinary incontinence/ or (chronic disease* or chronic illness* or osteoporosis or incontinen*).mp.

25. or/16-24

26. 15 and 25

27. 11 or 26

28. first posting.ps.

29. (27 not first posting).ps.

30. limit 29 to human

31. 27 and 28

32. 30 or 31

CINAHL

S1 ( (MH "Exercise+") OR (MH "Athletes+") OR (MH "Therapeutic Exercise+") OR (MH "Physical Fitness+") OR (MH "Physical Activity") OR (MH "Physical Endurance+") OR (MH "Exertion+") OR (MH "Sports+") OR (MH "Life Style, Sedentary") OR (MH "Yoga+") OR (MH "Tai Chi") ) OR TI ( exercise or "physical* activ*" or "strenuous activit*" or "physical* inactiv*" or sedentary or running or plyometric* or yoga or "tai chi" or "weight training" or "resistance training" or swim* or sport* or athlet* or walk or walking or mvpa or ltpa or stretching or "aerobic capacity" or fitness or weight* n2 lift* or (muscle or muscular or strength*) n2 conditioning )

S2 ((MH "Pregnancy Complications+") OR (MH "Pregnancy Outcomes") OR (MH "Pregnancy Trimesters+") OR (MH "Labor+") OR (MH "Delivery, Obstetric+") OR (MH "Surgery, Obstetrical+")) OR TI pregnan* OR MW pregnan*

S3 (birth or pregnancy or childbirth) n3 (outcome* or complication*) or (spontaneous or induc* or onset or length) n3 (labor or labour) or cesarean or caesarean or episiotom* or "vaginal delivery" or "gestational diabetes" or "pre-eclampsia" or preeclampsia or gestosis OR (normal or instrumental or assisted) n2 (delivery or birth or childbirth) or forceps or ventouse or "vacuum extraction" or miscarriage* or "spontaneous abortion*" OR ( ("mode of delivery" or "type of delivery") and (pregnan* or birth or childbirth or obstetric* or labor or labour) ) OR (tear* or ruptur* or hemorrhage*) n2 (placent* or vagin* or membran* or periton*)

S4 S2 OR S3

S5 S1 AND S4

S6 ( (MH "Pregnancy") OR (MH "Pregnancy Trimesters+") ) OR TI ( pregnan* or trimester* or antenatal or prenatal or perinatal or postnatal or prepartum or antepartum or postpartum or "pre partum" or "ante partum" or "post partum" or puerper* or primigravid* or primiparous or multiparous or nulliparous or multigravid* ) OR MW ( antenatal or prenatal or perinatal or postnatal or prepartum or antepartum or postpartum or primigravid* or primiparous or multiparous or nulliparous or multigravid* or trimester* or obstetric* )

S7 S1 and S6

S8 (pregnan* or trimester* or antenatal or prenatal or perinatal or postnatal or prepartum or antepartum or postpartum or "pre partum" or "ante partum" or "post partum" or puerper*) n5 (exercise or "physical* activ*" or "strenuous activit*" or "physical* inactiv*" or sedentary or running or plyometric* or yoga or "tai chi" or "weight training" or "resistance training" or (weight* n2 lift*) or swim* or sport* or athlet* or walk or walking or (muscle or muscular or strength*) n2 conditioning)

S9 S7 or S8

S10 ((MH "Insulin+") OR (MH "Diabetes Mellitus+") OR (MH "Prediabetic State") OR (MH "Hemoglobin A, Glycosylated") ) OR ( insulin or glucose or "glycemic control" or "glycaemic control" or "blood sugar" or diabet* or prediabet* or hba1c or "glycosylated hemoglobin" or "glycosylated haemoglobin" or hyperglycemi* or hyperglycaemi* or hypoglycemi* or hypoglycaemi* or weight n3 (gain* or change* or loss or lose or retention) or bmi or "body mass index" or "body composition" or "skinfold thickness" or (hip or waist) n2 ratio or (waist or abdominal) n2 circumference or overweight or obes* or adipos* or underweight or "normal weight" or "healthy weight" or hypertension or hypotension or fainting or syncope or lightheaded* or "light headed*" or dizziness or "blood pressure" or toxemi* or toxaemi* or "eph complex" or proteinuria or edema or hemodynamic* or haemodynamic* or systolic or diastolic or cardiovascular or cardiometabolic or "cardio-metabolic" or metabolic or heart or cardio* or cardiac or lipid* or "placental growth factor*" or triglyceride* or ldl or hdl or lipoprotein or cholesterol )

S11 ((MH "Dehydration") OR (MH "Cardiovascular Diseases+") ) OR ( dehydrat* or heart disease* or "cardiovascular disease*" )

S12 ((MH "Adaptation, Physiological") OR (MH "Body Temperature Regulation+") OR (MH "Physical Fitness+") OR (MH "Physical Endurance+") ) OR MW metabolism OR ( safe* or harm* or risk* or fitness or "aerobic capacity" or "oxygen consumption" or "vo2 max" or vo2max or "vo2 peak" or vo2peak or frequency or intensity or duration or "dose response" or fitt or zone or type* n2 exercise )

S13 ((MH "Chronic Disease") OR (MH "Urinary Incontinence+") OR (MH "Osteoporosis+") ) OR ( "chronic disease*" or "chronic illness*" or osteoporosis or incontinen* )

S14 ((MH "Back Pain+") OR (MH "Pelvic Pain+") OR (MH "Muscle Cramp") ) OR ( cramp* or (hip or back or pelvic or pelvis) n3 (pain or discomfort or ache) )

S15 ((MH "Mental Health") OR (MH "Mental Disorders+") OR (MH "Psychological Well-Being") OR (MH "Body Image") OR (MH "Self Concept")) OR ( "mental health" or "mental disorder*" or "mental illness*" or "mental disease*" or depression or depressive or mood or anxiety or "well being" or wellbeing or wellness or "body image" or "self perception" )

S16 (MH "Fatigue") or fatigue or exhaustion or injur* or trauma

S17 postur* or supine or valsalva or "diastasis recti" or "rectus abdominis" or "inter rectus distance" or "interrectus distance"

S18 S10 OR S11 OR S12 OR S13 OR S14 OR S15 OR S16 OR S17

S19 S9 AND S18

S20 S5 OR S19

Sport Discus

S1 (birth or pregnancy or childbirth) n3 (outcome* or complication*) or (spontaneous or induc* or onset or length) n3 (labor or labour) or cesarean or caesarean or episiotom* or "vaginal delivery" or "gestational diabetes" or "pre-eclampsia" or preeclampsia or gestosis) OR (normal or instrumental or assisted) n2 (delivery or birth or childbirth) or forceps or ventouse or "vacuum extraction" or miscarriage* or "spontaneous abortion*" OR ( ("mode of delivery" or "type of delivery") and (pregnan* or birth or childbirth or obstetric* or labor or labour) ) OR (tear* or ruptur* or hemorrhage*) n2 (placent* or vagin* or membran* or periton*) OR antenatal or prenatal or perinatal or postnatal or prepartum or antepartum or postpartum or "pre partum" or "ante partum" or "post partum" or puerper* or primigravid* or primiparous or multiparous or nulliparous or multigravid* or pregnan* or trimester* or obstetric*

S2 exercise or "physical* activ*" or "strenuous activit*" or "physical* inactiv*" or sedentary or running or plyometric* or yoga or "tai chi" or "weight training" or "resistance training" or swim* or sport* or athlet* or walk or walking or mvpa or ltpa or stretching or "aerobic capacity" or fitness or weight* n2 lift* or (muscle or muscular or strength*) n2 conditioning

S3 S1 and S2

[Limited to Academic Journal, Dissertation, Report]

Child Development & Adolescent Studies

exercise or "physical* activ*" or "strenuous activit*" or "physical* inactiv*" or sedentary or running or plyometric* or yoga or "tai chi" or "weight training" or "resistance training" or swim* or sport* or athlet* or walk or walking or mvpa or ltpa or stretching or "aerobic capacity" or fitness or weight* n2 lift* or (muscle or muscular or strength*) n2 conditioning

AND

pregnan* or antenatal or prenatal or perinatal or postnatal or prepartum or antepartum or postpartum or primigravid* or primiparous or multiparous or nulliparous or multigravid* or or trimester* or obstetric* or ( (birth or pregnancy or childbirth) n3 (outcome* or complication*) or (spontaneous or induc* or onset or length) n3 (labor or labour) or cesarean or caesarean or episiotom* or "vaginal delivery" or "gestational diabetes" or "pre-eclampsia" or preeclampsia or gestosis OR (normal or instrumental or assisted) n2 (delivery or birth or childbirth) or forceps or ventouse or "vacuum extraction" or miscarriage* or "spontaneous abortion*" OR ( ("mode of delivery" or "type of delivery") and (pregnan* or birth or childbirth or obstetric* or labor or labour) ) OR ( (tear* or ruptur* or hemorrhage*) n2 (placent* or vagin* or membran* or periton*)

[Limitedto Academic Journal]

ERIC

exercise or "physical* activ*" or "strenuous activit*" or "physical* inactiv*" or sedentary or running or plyometric* or yoga or "tai chi" or "weight training" or "resistance training" or swim* or sport* or athlet* or walk or walking or mvpa or ltpa or stretching or "aerobic capacity" or fitness or weight* n2 lift* or (muscle or muscular or strength*) n2 conditioning

AND

pregnan* or antenatal or prenatal or perinatal or postnatal or prepartum or antepartum or postpartum or primigravid* or primiparous or multiparous or nulliparous or multigravid* or or trimester* or obstetric* or ( (birth or pregnancy or childbirth) n3 (outcome* or complication*) or (spontaneous or induc* or onset or length) n3 (labor or labour) or cesarean or caesarean or episiotom* or "vaginal delivery" or "gestational diabetes" or "pre-eclampsia" or preeclampsia or gestosis OR (normal or instrumental or assisted) n2 (delivery or birth or childbirth) or forceps or ventouse or "vacuum extraction" or miscarriage* or "spontaneous abortion*" OR ( ("mode of delivery" or "type of delivery") and (pregnan* or birth or childbirth or obstetric* or labor or labour) ) OR ( (tear* or ruptur* or hemorrhage*) n2 (placent* or vagin* or membran* or periton*)

[Limited to Academic Journals]

Scopus

(((TITLE-ABS-KEY(((birth or pregnancy or childbirth) w/3 (outcome* or complication*)) or ((spontaneous or induc* or onset or length) w/3 (labor or labour)) or cesarean or caesarean or episiotom* or "vaginal delivery" or "gestational diabetes" or "pre-eclampsia" or preeclampsia or gestosis OR ( (normal or instrumental or assisted) w/2 (delivery or birth or childbirth) or forceps or ventouse or "vacuum extraction" or miscarriage* or "spontaneous abortion*" ) OR (("mode of delivery" or "type of delivery") and (pregnan* or birth or childbirth or obstetric* or labor or labour) ) OR ( (tear* or ruptur* or hemorrhage*) w/2 (placent* or vagin* or membran* or periton*)) OR antenatal or prenatal or perinatal or postnatal or prepartum or antepartum or postpartum or "pre partum" or "ante partum" or "post partum" or puerper* or primigravid* or primiparous or multiparous or nulliparous or multigravid* or pregnan* or obstetric* or trimester*))) AND (TITLE ( exercise* OR "physical* activ*" OR "strenuous activit*" OR "physical inactiv*" OR sedentary OR running OR plyometric* OR yoga OR "tai chi" OR "weight training" OR "resistance training" OR swim* OR sport* OR athlet* OR walk OR walking OR "muscle strengthening" OR "muscle conditioning" OR "muscular conditioning" OR "weight lifting" OR "lifting weight*" ))) OR ((TITLE-ABS-KEY((insulin or glucose or "glycemic control" or "glycaemic control" or "blood sugar" or diabet* or prediabet* or hba1c or "glycosylated hemoglobin" or "glycosylated haemoglobin" or hyperglycemi* or hyperglycaemi* or hypoglycemi* or hypoglycaemi* or (weight w/3 (gain* or change* or loss or lose or retention)) or bmi or "body mass index" or "body composition" or "skinfold thickness" or ((hip or waist) w/2 ratio) or ((waist or abdominal) w/2 circumference) or overweight or obes* or adipos* or underweight or "normal weight" or "healthy weight" or hypertension or hypotension or fainting or syncope or lightheaded* or "light headed*" or dizziness or "blood pressure" or toxemi* or toxaemi* or "eph complex" or proteinuria or edema or hemodynamic* or haemodynamic* or systolic or diastolic or cardiovascular or cardiometabolic or "cardio-metabolic" or metabolic or heart or cardio* or cardiac or lipid* or "placental growth factor*" or triglyceride* or ldl or hdl or lipoprotein or cholesterol or dehydrat* or heart disease* or "cardiovascular disease*" or safe* or harm* or risk* or fitness or "aerobic capacity" or "oxygen consumption" or "vo2 max" or vo2max or "vo2 peak" or vo2peak or frequency or intensity or duration or "dose response" or fitt or zone or (type* w/2 exercise) or "chronic disease*" or "chronic illness*" or osteoporosis or incontinen* or cramp* or ((hip or back or pelvic or pelvis) w/3 (pain or discomfort or ache)) or "mental health" or "mental disorder*" or "mental illness*" or "mental disease*" or depression or depressive or mood or anxiety or "well being" or wellbeing or wellness or fatigue or exhaustion or injur* or trauma or postur* or supine or valsalva or "diastasis recti" or "rectus abdominis" or "inter rectus distance" or "interrectus distance"))) AND (((TITLE(exercise* or "physical* activ*" or "strenuous activit*" or "physical inactiv*" or sedentary or running or plyometric* or yoga or "tai chi" or "weight training" or "resistance training" or swim* or sport* or athlet* or walk or walking OR "muscle strengthening" or "muscle conditioning" or "muscular conditioning" or "weight lifting" or "lifting weight*") AND TITLE-ABS-KEY(pregnan* or antenatal or prenatal or perinatal or postnatal or prepartum or antepartum or postpartum or "pre partum" or "ante partum" or "post partum" or puerper*)) AND (TITLE-ABS-KEY ( pregnan* OR antenatal OR prenatal OR perinatal OR postnatal OR prepartum OR antepartum OR postpartum OR "pre partum" OR "ante partum" OR "post partum" OR puerper* ))))) AND NOT (TITLE(rat or rats or mouse or mice or cow or cows or bovine or sheep or ewe*))

Web of Science Core Collection (including Emerging Science Citation Index)

#1 TI=(exercise* or "physical* activ*" or "strenuous activit*" or "physical inactiv*" or sedentary or running or plyometric* or yoga or "tai chi" or "weight training" or "resistance training" or swim* or sport* or athlet* or walk or walking or (muscle* or muscular or strength) near/2 conditioning or weight* near/2 lift*)

#2 TS=(pregnan* or antenatal or prenatal or perinatal or postnatal or prepartum or antepartum or postpartum or "pre partum" or "ante partum" or "post partum" or puerper* or primigravid* or primiparous or multiparous or nulliparous or multigravid* or trimester* or obstetric*)

#3 #1 AND #2

#4 TS=(insulin or glucose or "glycemic control" or "glycaemic control" or "blood sugar" or diabet* or prediabet* or hba1c or "glycosylated hemoglobin" or "glycosylated haemoglobin" or hyperglycemi* or hyperglycaemi* or hypoglycemi* or hypoglycaemi* or (weight near/3 (gain* or change* or loss or lose or retention)) or bmi or "body mass index" or "body composition" or "skinfold thickness" or ((hip or waist) near/2 ratio) or ((waist or abdominal) near2 circumference) or overweight or obes* or adipos* or underweight or "normal weight" or "healthy weight" or hypertension or hypotension or fainting or syncope or lightheaded* or "light headed*" or dizziness or "blood pressure" or toxemi* or toxaemi* or "eph complex" or proteinuria or edema or hemodynamic* or haemodynamic* or systolic or diastolic or cardiovascular or cardiometabolic or "cardio-metabolic" or metabolic or heart or cardio* or cardiac or lipid* or "placental growth factor*" or triglyceride* or ldl or hdl or lipoprotein or cholesterol or dehydrat* or heart disease* or "cardiovascular disease*" or safe* or harm* or risk* or fitness or "aerobic capacity" or "oxygen consumption" or "vo2 max" or vo2max or "vo2 peak" or vo2peak or frequency or intensity or duration or "dose response" or fitt or zone or (type* near2 exercise) or "chronic disease*" or "chronic illness*" or osteoporosis or incontinen* or cramp* or ((hip or back or pelvic or pelvis) near/3 (pain or discomfort or ache)) or "mental health" or "mental disorder*" or "mental illness*" or "mental disease*" or depression or depressive or mood or anxiety or "well being" or wellbeing or wellness or fatigue or exhaustion or injur* or traumaor postur* or supine or valsalva or "diastasis recti" or "rectus abdominis" or "inter rectus distance" or "interrectus distance")

#5 #3 AND #4

#6 TS=((birth or pregnancy or childbirth) near/3 (outcome* or complication*) or (spontaneous or induc* or onset or length) near/3 (labor or labour) or cesarean or caesarean or episiotom* or "vaginal delivery" or "gestational diabetes" or "pre-eclampsia" or preeclampsia or gestosis OR (normal or instrumental or assisted) near/2 (delivery or birth or childbirth) or forceps or ventouse or "vacuum extraction" or miscarriage* or "spontaneous abortion*" OR ("mode of delivery" or "type of delivery") and (pregnan* or birth or childbirth or obstetric* or labor or labour) OR (tear* or ruptur* or hemorrhage*) near/2 (placent* or vagin* or membran* or periton*))

#7 #1 AND #6

#8 #5 OR #7

#9 TS=(rat or rats or mouse or mice or cow or cows or bovine or sheep or ewe*)

#10 #9 NOT #8

Clinicatrials.gov

(exercise OR "physical activity" ) AND (antenatal OR prenatal OR perinatal OR postnatal OR prepartum OR antepartum OR postpartum OR "pre partum" OR fetus OR foetus OR fetal OR foetal)

(exercise OR "physical activity" ) AND ("ante partum" OR "post partum" OR puerper* OR primigravida OR primiparous OR multiparous OR nulliparous OR multigravida OR trimester OR trimesters OR obstetric)

*Fetal Outcomes Strategies*

MEDLINE

1. exp Exercise/ or Athletes/ or exp Exercise Movement Techniques/ or exp Exercise Therapy/ or exp Sports/ or Motor Activity/ or Physical Exertion/ or Sedentary Lifestyle/ or (exercise or physical* activ* or physical* inactiv* or sedentary or running or plyometric* or yoga or tai chi or weight training or resistance training or swim* or sport* or athlet* or walk or walking or mvpa or ltpa or stretching or aerobic capacity or fitness).ti,kf. or exercise.ab. /freq=2 or (weight* adj2 lift*).ti,kf. or ((muscle or muscular or strength*) adj2 conditioning).ti,kf.

2. Pregnancy/ or exp Pregnancy Complications/ or Pregnancy Outcome/ or exp Pregnancy Trimesters/ or Peripartum Period/ or Postpartum Period/ or pregnan*.hw. or (pregnan* or antenatal or prenatal or perinatal or postnatal or prepartum or antepartum or postpartum or pre partum or ante partum or post partum or puerper* or primigravid* or primiparous or multiparous or nulliparous or multigravid* or trimester* or obstetric*).ti,kf.

3. 1 and 2

4. ((pregnan* or maternal or antenatal or prenatal or perinatal or postnatal or prepartum or antepartum or postpartum or puerper* or pre partum or ante partum or post partum) adj5 (exercise or physical* activ* or strenuous activit* or physical* inactiv* or sedentary or running or plyometric* or yoga or tai chi or weight training or resistance training or (weight* adj2 lift*) or swim* or sport* or athlet* or walk or walking or mvpa or ltpa or stretching or aerobic capacity or fitness or ((muscle or muscular or strength*) adj2 conditioning))).ab.

5. 3 or 4

6. exp birth weight/ or fetal weight/

7. infant, low birth weight/ or infant, small for gestational age/ or exp infant, very low birth weight/ or infant, postmature/ or exp infant, premature/

8. ((preterm or pre matur* or prematur* or post matur* or postmatur*) adj2 birth).mp.

9. Fetal Growth Retardation/ or fetal hypoxia/ or fetal macrosomia/

10. exp Fetal Development/ or exp Congenital Abnormalities/ or exp Fetus/ or (f?etus or f?etal).ti,hw,kf.

11. maternal fetal exchange/ or (exp Uterus/ and exp Regional Blood Flow/) or (placenta* or uteroplacenta* or ((maternal f?etal or f?etomaternal or transplacental) adj2 (transfusion or exchange))).mp.

12. ((f?etal or f?etus) adj2 (response or matur*)).mp.

13. ((f?etal or f?etus or neonat* or newborn or infant) adj3 (growth or develop* or viability or viable or weight or wellbeing or well being or health or heart rate or heartrate or bradycardia or hypoxi* or hypoglyc?emi* or movement or oxygenation)).mp.

14. (((uterine or uterus) adj2 (blood flow or circulat*)) or ((uterine or umbilical or mid* cerebral) adj2 doppler)).mp.

15. (intrauterine growth or iugr).mp.

16. ((perinatal or f?etal or f?etus or neonat* or newborn* or infant*) adj3 (mortality or morbidity or death or outcome* or complication*)).mp.

17. (still birth or stillbirth).mp.

18. (birth weight or birthweight or macrosomia or gestational age or lga or sga or preterm or (prematur* adj2 (infant* or neonat* or newborn* or birth or labo?r))).mp.

19. ((neonatal or newborn* or infant* or f?etus or f?etal) and (fat* or abdominal circumference or body composition or bmi or body mass index or waist circumference or skeletal size or height or anthropometric* or apgar or adipos* or ph or base excess or metabolic or acidosis or insulin or diabet* or hyperbilirubin?emi*)).mp.

20. (f?etus or f?etal).mp. and (adaptation, physiological/ or me.fs.)

21. (((birth or delivery) adj3 (trauma or injur* or defect*)) or (dystocia or nicu or neonatal intensive care or brachial plexus)).mp.

22. exp Birth Injuries/

23. ((neonat* or infant* or newborn*) and (ponderal index or skinfold or bmi or body mass index)).mp.

24. Cerebral Palsy/ or exp Neural Tube Defects/ or Cleft Palate/ or (cerebral palsy or neural tube defect* or spina bifida or anencephal* or encephalocele* or iniencephal* or spinal dyraphism or diastematomyel* or lipomingocele* or lipmyelomeningocele* or meningomyelocele* or cleft palate* or cleft lip*).mp.

25. (((development* or learning or intellectual* or cognitive* or language or communication or speech or motor) adj2 (disorder* or disab* or delay*)) or behavio?r disorder* or attention deficit or autis* or asperger* or child development or developmental milestone* or neurodevelopment* or cognitive development or motor development or motor skill* or psychosocial development or chronic disease* or chronic illness* or cardiovascular or cardiometabolic or diabet* or heart disease*).mp. or exp Heart Disease/ or exp Mental Disorders Diagnosed in Childhood/

26. Pediatric Obesity/ or ((child* or p?ediatric) adj2 (obes* or overweight)).mp.

27. or/6-25

28. 5 and 27

29. (animals/ not (animals/ and humans/)) or ((rat or rats or mouse or mice or cow or cows or bovine or sheep or ewe*) not ((rat or rats or mouse or mice or cow or cows or bovine or cattle or sheep or ewe*) and (human* or women))).ti,ab,kf. or (rat or rats or mouse or mice or cow or cows or bovine or cattle or sheep or ewe*).ti.

30. 28 not 29

EMBASE

1. exp *exercise/ or *athlete/ or exp *kinesiotherapy/ or exp *sport/ or exp *physical activity/ or *sedentary lifestyle/ or (exercise or physical* activ* or physical* inactiv* or sedentary or running or plyometric* or yoga or tai chi or weight training or resistance training or swim* or sport* or athlet* or walk or walking or mvpa or ltpa or stretching or aerobic capacity or fitness or sport*).ti,kw. or exercise.ab. /freq=2 or (weight* adj2 lift*).ti,kw. or ((muscle or muscular or strength*) adj2 conditioning).ti,kw.

2. exp pregnancy/ or exp pregnancy complications/ or pregnancy outcome/ or perinatal period/ or puerperium/ or pregnan*.hw. or (pregnan* or antenatal or prenatal or perinatal or postnatal or prepartum or antepartum or postpartum or pre partum or ante partum or post partum or puerper* or primigravid* or primiparous or multiparous or nulliparous or multigravid* or trimester* or obstetric*).ti,kw.

3. 1 and 2

4. ((pregnan* or maternal or antenatal or prenatal or perinatal or postnatal or prepartum or antepartum or postpartum or pre partum or ante partum or post partum or puerper*) adj5 (exercise or physical* activ* or strenuous activit* or physical* inactiv* or sedentary or running or plyometric* or yoga or tai chi or weight training or resistance training or (weight* adj2 lift*) or swim* or sport* or athlet* or walk or walking or mvpa or ltpa or stretching or aerobic capacity or fitness or ((muscle or muscular or strength*) adj2 conditioning))).ab.

5. 3 or 4

6. fetus/ or exp birth weight/ or fetus weight/ or "parameters concerning the fetus, newborn and pregnancy"/ or apgar score/ or fetus heart rate/ or exp fetus maturity/ or fetus mortality/ or fetus outcome/ or fetus risk/ or gestational age/ or live birth/ or exp perinatal morbidity/ or exp perinatal mortality/ or prenatal mortality/ or exp intrauterine growth retardation/ or exp "immature and premature labor"/ or exp fetus growth/ or exp prenatal growth/ or fetus hypoxia/ or macrosomia/ or exp fetus development/ or exp congenital disorder/ or exp fetus disease/ or fetomaternal transfusion/ or exp stillbirth/ or spontaneous abortion/ or birth injury/ or cerebral palsy/ or exp neural tube defect/ or child development/ or postnatal development/ or exp mental development/ or childhood obesity/ or exp body composition/ or anthropometric parameters/ or abdominal circumference/ or hip circumference/ or sagittal abdominal diameter/ or waist circumference/ or waist hip ratio/ or waist to height ratio/ or weight height ratio/

7. placenta insufficiency/

8. 6 or 7

9. (f?etus or f?etal).ti,hw,kw. or ((f?etal or f?etus) adj2 (response or matur*)).mp.

10. (placenta* or uteroplacenta* or ((maternal f?etal or transplacental or f?etomaternal) adj2 (exchange or transfusion))).mp.

11. ((f?etal or f?etus or neonat* or newborn or infant) adj3 (growth or develop* or viability or viable or weight or wellbeing or well being or health or heart rate or heartrate or bradycardia or hypoxi* or hypoglyc?emi* or movement or oxygenation)).mp.

12. (((uterine or uterus) adj2 (blood flow or circulat*)) or ((uterine or umbilical or mid* cerebral) adj2 doppler)).mp.

13. (intrauterine growth or iugr).mp.

14. ((perinatal or f?etal or f?etus or neonat* or newborn* or infant*) adj3 (mortality or death or outcome* or complication*)).mp.

15. (still birth or stillbirth).mp.

16. (birth weight or birthweight or macrosomia or gestational age or lga or sga or preterm or (prematur* adj2 (infant* or neonat* or newborn* or birth or labo?r))).mp.

17. ((neonatal or newborn* or infant* or f?etus or f?etal) and (fat* or abdominal circumference or body composition or bmi or body mass index or waist circumference or skeletal size or height or anthropometric* or apgar or adipos* or ph or base excess or metabolic or acidosis or insulin or diabet* or hyperbilirubin?emi*)).mp.

18. (((birth or delivery) adj3 (trauma or injur* or defect*)) or (dystocia or nicu or neonatal intensive care or brachial plexus)).mp.

19. ((neonat* or infant* or newborn*) and (ponderal index or skinfold or bmi or body mass index)).mp.

20. (cerebral palsy or neural tube defect* or spina bifida or anencephal* or encephalocele* or iniencephal* or spinal dyraphism or diastematomyel* or lipomingocele* or lipmyelomeningocele* or meningomyelocele* or cleft palate* or cleft lip*).mp.

21. (((development* or learning or intellectual* or cognitive* or language or communication or speech or motor) adj2 (disorder* or disab* or delay* or impair*)) or behavio?r disorder* or attention deficit or autis* or asperger* or child development or developmental milestone* or neurodevelopment* or cognitive development or motor development or motor skill* or psychosocial development or chronic disease* or chronic illness* or cardiovascular or cardiometabolic or diabet* or heart disease*).mp. or childhood disease/ or exp infant disease/ or exp "disorders of higher cerebral function"/ or exp heart disease/

22. ((child* or p?ediatric) adj2 (obes* or overweight)).mp.

23. or/9-22

24. 8 or 23

25. 5 and 24

26. exp animal/ not (exp animal/ and human/)

27. 25 not 26

PsycInfo

1. physical activity/ or exp exercise/ or activity level/ or athletes/ or exp sports/ or ((exercise or physical* activ* or strenuous activit* or physical* inactiv* or sedentary or running or plyometric* or yoga or tai chi or weight training or resistance training or swim* or sport* or athlet* or walk or walking or mvpa or ltpa or stretching or aerobic capacity).ti,ab,id. or ((weight* adj2 lift*) or ((muscle or muscular or strength*) adj2 conditioning))).ti,ab,id.

2. exp pregnancy/ or obstetrical complications/ or pregnancy outcomes/ or pregnan*.ti,hw,id. or (antenatal or prenatal or perinatal or postnatal or prepartum or antepartum or postpartum or primigravid* or primiparous or multiparous or nulliparous or multigravid* or trimester* or obstetric*).ti,ab,id.

3. 1 and 2

4. prenatal development/ or birth weight/ or prenatal exposure/ or premature birth/ or fetus/ or amniotic fluid/ or (blood flow/ and uterus/)

5. (f?etus or f?etal or ((preterm or pre matur* or prematur* or post matur* or postmatur*) adj2 birth)).mp.

6. (placenta* or uteroplacenta* or ((maternal f?etal or f?etomaternal or transplacental) adj2 (transfusion or exchange))).mp.

7. ((neonat* or newborn or infant) adj3 (growth or develop* or viability or viable or weight or wellbeing or well being or health or heart rate or heartrate or bradycardia or hypoxi* or hypoglyc?emi* or movement or oxygenation)).mp.

8. (((uterine or uterus) adj2 (blood flow or circulat*)) or ((uterine or umbilical or mid* cerebral) adj2 doppler)).mp.

9. (intrauterine growth or iugr).mp.

10. ((perinatal or f?etal or f?etus or neonat* or newborn* or infant*) adj3 (mortality or morbidity or death or outcome* or complication*)).mp.

11. (still birth or stillbirth).mp.

12. (birth weight or birthweight or macrosomia or gestational age or lga or sga or preterm or (prematur* adj2 (infant* or neonat* or newborn* or birth or labo?r))).mp.

13. ((neonatal or newborn* or infant* or f?etus or f?etal) and (fat* or abdominal circumference or body composition or bmi or body mass index or waist circumference or skeletal size or height or anthropometric* or apgar or adipos* or ph or base excess or metabolic or acidosis or insulin or diabet* or hyperbilirubin?emi*)).mp.

14. (((birth or delivery) adj3 (trauma or injur* or defect*)) or (dystocia or nicu or neonatal intensive care or brachial plexus)).mp.

15. birth injuries/ or birth trauma/

16. ((neonat* or infant* or newborn*) and (ponderal index or skinfold or bmi or body mass index)).mp.

17. exp congenital disorders/ or cerebral palsy/ or cleft palata/ or (cerebral palsy or neural tube defect* or spina bifida or anencephal* or encephalocele* or iniencephal* or spinal dyraphism or diastematomyel* or lipomingocele* or lipmyelomeningocele* or meningomyelocele* or cleft palate* or cleft lip*).mp.

18. exp developmental disabilities/ or exp communication disorders/ or exp delayed development/ or exp intellectual development disorder/ or exp learning disorders/ or exp nervous system disorders/ or exp pervasive developmental disorders/

19. (((development* or learning or intellectual* or cognitive* or language or communication or speech or motor) adj2 (disorder* or disab* or delay*)) or behavio?r disorder* or attention deficit or autis* or asperger* or child development or developmental milestone* or neurodevelopment* or cognitive development or motor development or motor skill* or psychosocial development or chronic disease* or chronic illness* or cardiovascular or cardiometabolic or diabet* or heart disease*).mp. or health disorders/

20. ((child* or p?ediatric) adj2 (obes* or overweight)).mp.

21. or/4-20

22. 3 and 21

23. first posting.ps.

24. 22 not 23

25. limit 24 to human

26. 22 not 24

27. 25 or 26

CINAHL

S1 ( (MH "Exercise+") OR (MH "Athletes+") OR (MH "Therapeutic Exercise+") OR (MH "Physical Fitness+") OR (MH "Physical Activity") OR (MH "Physical Endurance+") OR (MH "Exertion+") OR (MH "Sports+") OR (MH "Life Style, Sedentary") OR (MH "Yoga+") OR (MH "Tai Chi") ) OR TI ( exercise or "physical* activ*" or "strenuous activit*" or "physical* inactiv*" or sedentary or running or plyometric* or yoga or "tai chi" or "weight training" or "resistance training" or swim* or sport* or athlet* or walk or walking or mvpa or ltpa or stretching or "aerobic capacity" or fitness or weight* n2 lift* or (muscle or muscular or strength*) n2 conditioning )

S2 ( (MH "Pregnancy") OR (MH "Pregnancy Complications+") OR (MH "Pregnancy Outcomes") OR (MH "Pregnancy Trimesters+") OR (MH "Postnatal Period") OR (MH "Puerperium") ) OR MW pregnan* OR TI ( pregnan* or antenatal or prenatal or perinatal or postnatal or prepartum or antepartum or postpartum or pre partum or ante partum or post partum or puerper* or primigravid* or primiparous or multiparous or nulliparous or multigravid* or trimester* or obstetric* )

S3 S1 AND S2

S4 AB ((pregnan* or maternal or antenatal or prenatal or perinatal or postnatal or prepartum or antepartum or postpartum or puerper* or "pre partum" or "ante partum" or "post partum") n5 (exercise or "physical* activ*" or "strenuous activit*" or "physical* inactiv*" or sedentary or running or plyometric* or yoga or "tai chi" or "weight training" or "resistance training" or weight* n2 lift* or "lift* weight*" or swim* or sport* or athlet* or walk or walking or mvpa or ltpa or stretching or "aerobic capacity" or fitness or (muscle or muscular or strength*) n2 conditioning)

S5 S3 OR S4

S6 (MH "Birth Weight") OR (MH "Infant, Very Low Birth Weight") OR (MH "Infant, Low Birth Weight+") OR (MH "Fetal Weight") OR (MH "Infant, Small for Gestational Age") OR (MH "Infant, Premature") OR (MH "Infant, Premature, Diseases+") OR (MH "Fetal Growth Retardation") OR (MH "Fetal Anoxia") OR (MH "Fetal Macrosomia") OR (MH "Infant, Postmature") OR (MH "Infant, Large for Gestational Age") OR (MH "Fetus+") OR (MH "Maternal-Fetal Exchange") OR (MH "Perinatal Death") OR (MH "Birth Injuries+") OR (MH "Cerebral Palsy") OR (MH "Neural Tube Defects+") OR (MH "Cleft Palate") OR (MH "Heart Diseases+") OR (MH "Mental Disorders Diagnosed in Childhood+") OR (MH "Pediatric Obesity")

S7 (MH "Uterus+") AND (MH "Blood Circulation+")

S8 ( TI (f#etus or f#etal) or MW (f#etus OR f#etal OR ( placenta* or uteroplacenta* or ("maternal f#etal" or f#etomaternal or transplacental) w2 (transfusion or exchange) or (f#etal or f#etus) w2 (response or matur*) )

S9 ( (f#etal or f#etus or neonat* or newborn or infant) n3 (growth or develop* or viability or viable or weight or wellbeing or "well being" or health or "heart rate" or heartrate or bradycardia or hypoxi* or hypoglyc#emi* or movement or oxygenation) ) OR ( (uterine or uterus) n2 ("blood flow" or circulat*) or (uterine or umbilical or mid* cerebral) n2 doppler ) OR ( "intrauterine growth" or iugr )

S10 ( (perinatal or f#etal or f#etus or neonat* or newborn* or infant*) n3 (mortality or morbidity or death or outcome* or complication*) ) OR ( "still birth" or stillbirth or (preterm or "pre matur*" or prematur* or "post matur*" or postmatur*) w2 (birth or childbirth or labo#r or infant* or newborn* or neonat*) ) OR ( "birth weight" or birthweight or macrosomia or "gestational age" or lga or sga )

S11 ( (perinatal or f#etal or f#etus or neonat* or newborn* or infant*) n3 (mortality or morbidity or death or outcome* or complication*) ) OR ( "still birth" or stillbirth or (preterm or pre matur* or prematur* or post matur* or postmatur*) w2 (birth or childbirth or labo#r or infant* or newborn* or neonat*) ) OR ( "birth weight" or birthweight or macrosomia or gestational age or lga or sga ) OR ( (neonatal or newborn* or infant* or fetus or fetal or foetus or foetal) and (fat* or "abdominal circumference" or "body composition" or bmi or "body mass index" or "waist circumference" or "skeletal size" or height or anthropometric* or apgar or adipos* or ph or base n2 excess or metabolic or acidosis or insulin or diabet* or hyperbilirubin#emi*) )

S12 ( (MH "Adaptation, Physiological") OR MM metabolism ) AND ( f#etus or f#etal )

S13 ( (birth or delivery) n3 (trauma or injur* or defect*) or dystocia or nicu or "neonatal intensive care" or "brachial plexus" ) OR ( (neonat* or infant* or newborn*) and (ponderal index or skinfold or bmi or body mass index) ) OR ( "cerebral palsy" or "neural tube defect*" or "spina bifida" or anencephal* or encephalocele* or iniencephal* or "spinal dyraphism" or diastematomyel* or lipomingocele* or lipmyelomeningocele* or meningomyelocele* or "cleft palate*" or "cleft lip*" )

S14 ( (development* or learning or intellectual* or cognitive* or language or communication or speech or motor) n2 (disorder* or disab* or delay*) ) OR ( "behavio#r disorder*" or "attention deficit" or autis* or asperger* or "child development" or "developmental milestone*" or neurodevelopment* or "cognitive development" or "motor development" or "motor skill*" or "psychosocial development" or "chronic disease*" or "chronic illness*" or cardiovascular or cardiometabolic or diabet* or "heart disease*" ) OR ( (child* or p#ediatric) n2 (obes* or overweight) )

S15 S6 OR S7 OR S8 OR S9 OR S10 OR S11 OR S12 OR S13 OR S14

S16 S5 AND S15

Sport Discus/Child Development & Adolescent Studies/ERIC

S1 exercise or "physical* activ*" or "strenuous activit*" or "physical* inactiv*" or sedentary or running or plyometric* or yoga or "tai chi" or "weight training" or "resistance training" or swim* or sport* or athlet* or walk or walking or mvpa or ltpa or stretching or "aerobic capacity" or fitness or weight* n2 lift* or (muscle or muscular or strength*) n2 conditioning

S2 pregnan* or antenatal or prenatal or perinatal or postnatal or prepartum or antepartum or postpartum or "pre partum" or "ante partum" or "post partum" or puerper* or primigravid* or primiparous or multiparous or nulliparous or multigravid* or trimester* or obstetric*

S3 S1 and S2

S4 ( f#etus or f#etal or ( placenta* or uteroplacenta* or ("maternal f#etal" or f#etomaternal or transplacental) w2 (transfusion or exchange) or (f#etal or f#etus) w2 (response or matur*) ) ) OR ( (f#etal or f#etus or neonat* or newborn or infant) n3 (growth or develop* or viability or viable or weight or wellbeing or "well being" or health or heart rate or heartrate or bradycardia or hypoxi* or hypoglyc#emi* or movement or oxygenation) ) OR ( (uterine or uterus) n2 ("blood flow" or "blood circulat*") or (uterine or umbilical or mid* cerebral) n2 doppler or "intrauterine growth" or iugr )

S5 ( (perinatal or f#etal or f#etus or neonat* or newborn* or infant*) n3 (mortality or morbidity or death or outcome* or complication*) ) OR ( "still birth" or stillbirth or (preterm or "pre matur*" or prematur* or "post matur*" or postmatur*) w2 (birth or childbirth or labo#r or infant* or newborn* or neonat*) ) OR ( “birth weight" or birthweight or macrosomia or "gestational age" or lga or sga ) OR ( (neonatal or newborn* or infant* or f#etus or f#etal) and (fat* or "abdominal circumference" or "body composition" or bmi or "body mass index" or "waist circumference" or "skeletal size" or height or anthropometric* or apgar or adipos* or ph or base n2 excess or metabolic or acidosis or insulin or diabet* or hyperbilirubin#emi*) )

S6 ( birth or delivery) n3 (trauma or injur* or defect*) or dystocia or nicu or "neonatal intensive care" or "brachial plexus" ) OR ( (neonat* or infant* or newborn*) and ("ponderal index" or skinfold or bmi or body mass index) ) OR ( "cerebral palsy" or "neural tube defect*" or "spina bifida" or anencephal* or encephalocele* or iniencephal* or "spinal dyraphism" or diastematomyel* or lipomingocele* or lipmyelomeningocele* or meningomyelocele* or "cleft palate*" or "cleft lip*" )

S7 ( (development* or learning or intellectual* or cognitive* or language or communication or speech or motor) n2 (disorder* or disab* or delay*) ) OR ( "behavio#r disorder*" or "attention deficit" or autis* or asperger* or "child development" or "developmental milestone*" or neurodevelopment* or "cognitive development" or "motor development" or "motor skill*" or "psychosocial development" or "chronic disease*" or "chronic illness*" or cardiovascular or cardiometabolic or diabet* or "heart disease*" ) OR ( (child* or p#ediatric) n2 (obes* or overweight) )

S8 S4 OR S5 OR S6 OR S7

S9 S3 AND S8

Scopus

((TITLE-ABS-KEY( fetus or fetal or foetus or foetal or "intrauterine growth" or iugr) OR TITLE-ABS-KEY((placenta* or uteroplacenta* or "maternal fetal" or "maternal foetal" or fetomaternal or foetomaternal or transplacental) w/2 transfusion)) or (TITLE-ABS-KEY((fetal or foetal or fetus or foetus) w/2 (response or matur*))) or (TITLE-ABS-KEY ( ( ( uterine OR uterus ) W/2 ( "blood flow" OR circulat* ) ) OR ( ( uterine OR umbilical OR "mid* cerebral" ) W/2 doppler ) OR "intrauterine growth" OR iugr )) or (TITLE-ABS-KEY((fetal or foetal or fetus or foetus or neonat* or newborn or infant) and (growth or develop* or viability or viable or weight or wellbeing or "well being" or health or heart rate or heartrate or bradycardia or hypoxi* or hypoglycemi* or hypoglycaemi* or movement or oxygenation))) or (TITLE-ABS-KEY("still birth" or stillbirth or ((preterm or "pre matur*" or prematur* or "post matur*" or postmatur*) w/2 (birth or childbirth or labor or labour or infant* or newborn* or neonat*))) OR TITLE-ABS-KEY(( "birth weight" or birthweight or macrosomia or "gestational age" or lga or sga ) ) OR TITLE-ABS-KEY(((neonatal or newborn* or infant* or fetus or fetal or foetus or foetal) and (fat* or "abdominal circumference" or "body composition" or bmi or "body mass index" or "waist circumference" or "skeletal size" or height or anthropometric* or apgar or adipos* or ph or "base excess" or metabolic or acidosis or insulin or diabet* or hyperbilirubinemi* or hyperbilirubinaemi*)))) or (TITLE-ABS-KEY((perinatal or fetal or fetus or foetal or foetus or neonat* or newborn* or infant*) W/3 (mortality or morbidity or death or outcome* or complication*) )) or (TITLE-ABS-KEY((( birth or delivery) w/3 (trauma or injur* or defect*)) or dystocia or nicu or "neonatal intensive care" or "brachial plexus" ) OR TITLE-ABS-KEY(( (neonat* or infant* or newborn*) and ("ponderal index" or skinfold or bmi or body mass index) ) ) OR TITLE-ABS-KEY("cerebral palsy" or "neural tube defect*" or "spina bifida" or anencephal* or encephalocele* or iniencephal* or "spinal dyraphism" or diastematomyel* or lipomingocele* or lipmyelomeningocele* or meningomyelocele* or "cleft palate*" or "cleft lip" )) or (TITLE-ABS-KEY(( (development* or learning or intellectual* or cognitive* or language or communication or speech or motor) w/2 (disorder* or disab* or delay*) )) OR TITLE-ABS-KEY("behavior disorder*" or "behaviour disorder*" or "attention deficit" or autis* or asperger* or "child development" or "developmental milestone*" or neurodevelopment* or "cognitive development" or "motor development" or "motor skill*" or "psychosocial development" or "chronic disease*" or cardiovascular or cardiometabolic or diabet* or "heart disease*") OR TITLE-ABS-KEY(( (child* or pediatric or paediatric) w/2 (obes* or overweight) )))) and ((TITLE( exercise* OR "physical* activ*" OR "strenuous activit*" OR "physical inactiv*" OR sedentary OR running OR plyometric* OR yoga OR "tai chi" OR "weight training" OR "resistance training" OR swim* OR sport* OR athlet* OR walk OR walking OR "muscle strengthening" OR "muscle conditioning" OR "muscular conditioning" OR "weight lifting" OR "lifting weight*" )) AND (TITLE-ABS-KEY ( pregnan* or antenatal or prenatal or perinatal or postnatal or prepartum or antepartum or postpartum or "pre partum" or "ante partum" or "post partum" or puerper* or primigravid* or primiparous or multiparous or nulliparous or multigravid* or trimester* or obstetric*))) AND NOT TITLE-ABS-KEY(rat or rats or mouse or mice or cow or cows or bovine or cattle or sheep or ewe*)

Web of Science Core Collection (including Emerging Sources Citation Index)

#1 TI=(exercise* or "physical* activ*" or "strenuous activit*" or "physical inactiv*" or sedentary or running or plyometric* or yoga or "tai chi" or "weight training" or "resistance training" or swim* or sport* or athlet* or walk or walking or (muscle* or muscular or strength) near/2 conditioning or weight* near/2 lift*)

#2 TS=(pregnan* or antenatal or prenatal or perinatal or postnatal or prepartum or antepartum or postpartum or pre partum or ante partum or post partum or puerper* or primigravid* or primiparous or multiparous or nulliparous or multigravid* or trimester* or obstetric*)

#3 #1 AND #2

#4 TI=(f$etus or f$etal) or TS=(placenta* or uteroplacenta* or ("maternal f$etal" or f$etomaternal or transplacental) near/2 (transfusion or exchange) or (f$etal or f$etus) near/2 (response or matur*) )

#5 TS=((f$etal or f$etus or neonat* or newborn or infant) near/3 (growth or develop* or viability or viable or weight or wellbeing or "well being" or health or "heart rate" or heartrate or bradycardia or hypoxi* or hypoglyc$emi* or movement or oxygenation) OR (uterine or uterus) near/2 ("blood flow" or "circulat*") or ((uterine or umbilical or "mid* cerebral") near/2 doppler) OR "intrauterine growth" or iugr )

#6 TS=( (perinatal or f$etal or f$etus or neonat* or newborn* or infant*) near/3 (mortality or morbidity or death or outcome* or complication*) OR "still birth" or stillbirth OR "birth weight" or birthweight or macrosomia or "gestational age" or lga or sga )

#7 TS=( (perinatal or f$etal or f$etus or neonat* or newborn* or infant*) near/3 (mortality or morbidity or death or outcome* or complication*) OR "still birth" or stillbirth or (preterm or "pre matur*" or prematur* or "post matur*" or postmatur*) near/2 (birth or childbirth or labo$r or infant* or newborn* or neonat*) OR "birth weight" or birthweight or macrosomia or gestational age or lga or sga OR (neonatal or newborn* or infant* or f$etus or f$etal) and (fat* or "abdominal circumference" or "body composition" or bmi or "body mass index" or "waist circumference" or "skeletal size" or height or anthropometric* or apgar or adipos* or ph or base near/2 excess or metabolic or acidosis or insulin or diabet* or hyperbilirubin$emi*))

#8 TS=((birth or delivery) near/3 (trauma or injur* or defect*) or dystocia or nicu or "neonatal intensive care" or "brachial plexus" OR ( (neonat* or infant* or newborn*) and (ponderal index or skinfold or bmi or body mass index) ) OR "cerebral palsy" or "neural tube defect*" or "spina bifida" or anencephal* or encephalocele* or iniencephal* or "spinal dyraphism" or diastematomyel* or lipomingocele* or lipmyelomeningocele* or meningomyelocele* or "cleft palate*" or "cleft lip*" )

#9 TS=( (development* or learning or intellectual* or cognitive* or language or communication or speech or motor) near/2 (disorder* or disab* or delay*) OR "behavio$r disorder*" or "attention deficit" or autis* or asperger* or "child development" or "developmental milestone*" or neurodevelopment* or "cognitive development" or "motor development" or "motor skill*" or "psychosocial development" or "chronic disease*" or "chronic illness*" or cardiovascular or cardiometabolic or diabet* or "heart disease*" OR (child* or p$ediatric) near/2 (obes* or overweight) )

#10 #9 OR #8 OR #7 OR #6 OR #5 OR #4

#11 #3 AND #10

#12 TS=(rat or rats or mouse or mice or cow or cows or bovine or cattle or sheep or ewe*)

#13 #11 NOT #12

Clinicatrials.gov

(exercise OR "physical activity" ) AND (antenatal OR prenatal OR perinatal OR postnatal OR prepartum OR antepartum OR postpartum OR "pre partum" OR fetus OR foetus OR fetal OR foetal)

(exercise OR "physical activity" ) AND ("ante partum" OR "post partum" OR puerper* OR primigravida OR primiparous OR multiparous OR nulliparous OR multigravida OR trimester OR trimesters OR obstetric)

Trip Database

title(exercise OR "physical activity" ) AND title(pregnan* or antenatal OR prenatal OR perinatal OR postnatal OR prepartum OR antepartum OR postpartum OR "pre partum" OR fetus OR foetus OR fetal OR foetal)

**5) References excluded with reasons**

| **No outcome of interest** |
| --- |
| **A. A. Amaeze, M. T. Anasonye, U. O. Abaraogu, S. E. Igwe and U. A. C. Okafor.**. Birth weight does not associate with gestational physical activity profile: A retrospective cohort study. *African Journal for Physical, Health Education, Recreation & Dance.* 2015. 21:860-868 |
| **A. A. Johnson, E. M. Knight, C. H. Edwards, et al.**. Selected lifestyle practices in urban African American women--relationships to pregnancy outcome, dietary intakes and anthropometric measurements. *J.Nutr..* 1994. 124:963S-972S |
| **A. A. Johnson, E. M. Knight, C. H. Edwards, et al.**. Selected lifestyle practices in urban African American women--relationships to pregnancy outcome, dietary intakes and anthropometric measurements. 1994. 124:963S-972S |
| **A. Alegre, F. J. Rodriguez-Escudero, E. Cruz and M. Prada.**. Influence of work during pregnancy on fetal weight. 1984. 29:334-336 |
| **A. Alegre, F. Rodriguez-Escudero, E. Cruz and M. Prada.**. Influence of work during pregnancy on fetal weight. *J.Reprod.Med..* 1984. 29:334-336 |
| **A. B. Granath, M. S. Hellgren and R. K. Gunnarsson.**. Water aerobics reduces sick leave due to low back pain during pregnancy. 2006. 35:465-471 |
| **A. B. Granath, M. S. Hellgren and R. K. Gunnarsson.**. Water aerobics reduces sick leave due to low back pain during pregnancy. *Journal of obstetric, gynecologic, and neonatal nursing : JOGNN.* 2006. 35:465-471 |
| **A. Bener and N. M. Saleh.**. The impact of socio-economic, lifestyle habits, and obesity in developing of pregnancy-induced hypertension in fast-growing country: global comparisons. 2013. 40:52-57 |
| **A. Bergmann, M. Zygmunt and J. F. Clapp 3.**. Running throughout pregnancy: effect on placental villous vascular volume and cell proliferation. *Placenta.* 2004. 25:694-698 |
| **A. Bertolotto, L. Volpe, A. Calianno, et al.**. Physical activity and dietary habits during pregnancy: effects on glucose tolerance. 2010. 23:1310-1314 |
| **A. Besnier, P. Therme and T. Marqueste.**. Influence of physical activity and sports practice before and during pregnancy on the development of gestational diabetes. *Revue Sage - Femme.* 2015. #volume# |
| **A. Bonen, P. Campagna, L. Gilchrist, D. C. Young and P. Beresford.**. Substrate and endocrine responses during exercise at selected stages of pregnancy. *J.Appl.Physiol..* 1992. 73:134-142 |
| **A. Bonen, P. D. Campagna, L. Gilchrist and P. Beresford.**. Substrate and hormonal responses during exercise classes at selected stages of pregnancy. *Canadian Journal of Applied Physiology.* 1995. 20:440-451 |
| **A. Bowen, N. Stewart, M. Baetz and N. Muhajarine.**. Antenatal depression in socially high-risk women in Canada. 2009. 63:414-416 |
| **A. Bugalho, A. Bacci and S. Bergstrom.**. Risk factors in Mozambican women with eclampsia: a case-referent study. 2001. 5:30-35 |
| **A. C. Hackney, V. L. Katz, W. J. Watson, M. M. Gall and R. G. McMurray.**. Alpha-fetoprotein, prolactin and cortisol responses to maximal exercise during pregnancy. *Scandinavian Journal of Medicine and Science in Sports.* 1993. 3:41-45 |
| **A. Chiolero, G. Paradis and J. S. Kaufman.**. Assessing the possible direct effect of birth weight on childhood blood pressure: a sensitivity analysis. *Am.J.Epidemiol..* 2014. 179:4-11 |
| **A. Coban, G. G. Arslan, A. Colakfakioglu and A. Sirlan.**. Impact on quality of life and physical ability of pregnancy-related back pain in the third trimester of pregnancy. 2011. 61:1122-1124 |
| **A. Coxon and J. W. Haggith.**. The effects of abdominal decompression on vascular haemodynamics in pregnancy and labour. *Journal of Obstetrics & Gynaecology of the British Commonwealth.* 1971. 78:49-54 |
| **A. Croteau, S. Marcoux and C. Brisson.**. Work activity in pregnancy, preventive measures, and the risk of delivering a small-for-gestational-age infant. *Am.J.Public Health.* 2006. 96:846-855 |
| **A. D. Larsen, H. Hannerz, M. Juhl, et al.**. Psychosocial job strain and risk of adverse birth outcomes: A study within the Danish national birth cohort. 2013. 70:845-851 |
| **A. D. McDonald, B. Armstrong and N. M. Cherry.**. Spontaneous abortion and occupation. *Journal of Occupational Medicine.* 1986. 28:1232-1238 |
| **A. D. McDonald, J. C. McDonald, B. Armstrong, et al.**. Fetal death and work in pregnancy. 1988. 45:148-157 |
| **A. D. McDonald, J. C. McDonald, B. Armstrong, et al.**. PMC1007961; Fetal death and work in pregnancy. *Br.J.Ind.Med..* 1988. 45:148-157 |
| **A. D. McDonald, J. C. McDonald, B. Armstrong, N. M. Cherry, A. D. Nolin and D. Robert.**. Prematurity and work in pregnancy. *Br.J.Ind.Med..* 1988. 45:56-62 |
| **A. D. Stein, J. M. Rivera and J. M. Pivarnik.**. Measuring energy expenditure in habitually active and sedentary pregnant women. *Med.Sci.Sports Exerc..* 2003. 35:1441-1446 |
| **A. Dinc, N. Kizilkaya Beji and O. Yalcin.**. Effect of pelvic floor muscle exercises in the treatment of urinary incontinence during pregnancy and the postpartum period. *Int.Urogynecol.J.Pelvic Floor Dysfunct..* 2009. 20:1223-1231 |
| **A. E. Beddoe, C. P. P. Yang, H. P. Kennedy, S. J. Weiss and K. A. Lee.**. The Effects of Mindfulness-Based Yoga During Pregnancy on Maternal Psychological and Physical Distress. *Jognn-Journal of Obstetric Gynecologic and Neonatal Nursing.* 2009. 38:310-319 |
| **A. E. Beddoe, K. A. Lee, S. J. Weiss, H. P. Kennedy and C. P. Yang.**. Effects of mindful yoga on sleep in pregnant women: a pilot study. 2010. 11:363-370 |
| **A. E. Montpetit, H. Plourde, T. R. Cohen and K. G. Koski.**. Modeling the impact of prepregnancy BMI, physical activity, and energy intake on gestational weight gain, infant birth weight, and postpartum weight retention. *Journal of Physical Activity & Health.* 2012. 9:1020-1029 |
| **A. E. Ruifrok, E. Althuizen, N. Oostdam, et al.**. PMC4189770; The relationship of objectively measured physical activity and sedentary behaviour with gestational weight gain and birth weight. *Journal of Pregnancy.* 2014. 2014:567379 |
| **A. ElDeeb, A. A. Sabbour, K. Abd-Ghafar and W. A. Ayad.**. Effect of Stabilizing Exercises Augmented by Pelvic Floor Training on Postpartum Low Back Pain. *Journal of Womens Health.* 2016. 25:A11 |
| **A. F. Adeniyi and O. O. Ogwumike.**. Physical activity and energy expenditure: findings from the Ibadan Pregnant Women's Survey. 2014. 18:117-126 |
| **A. F. Robledo-Colonia, N. Sandoval-Restrepo, Y. F. Mosquera-Valderrama, C. Escobar-Hurtado and R. Ramirez-Velez.**. Aerobic exercise training during pregnancy reduces depressive symptoms in nulliparous women: a randomised trial. 2012. 58:9-15 |
| **A. F. Saftlas, N. Logsden-Sackett, W. Wang, R. Woolson and M. B. Bracken.**. Work, leisure-time physical activity, and risk of preeclampsia and gestational hypertension. *Am.J.Epidemiol..* 2004. 160:758-765 |
| **A. Fast, L. Weiss, E. J. Ducommun, E. Medina and J. G. Butler.**. Low-back pain in pregnancy. Abdominal muscles, sit-up performance, and back pain. 1990. 15:28-30 |
| **A. Ferrara, M. M. Hedderson, C. L. Albright, et al.**. A pregnancy and postpartum lifestyle intervention in women with gestational diabetes mellitus reduces diabetes risk factors: a feasibility randomized control trial. 2011. 34:1519-1525 |
| **A. Fraser, K. Tilling, C. Macdonald-Wallis, et al.**. Associations of gestational weight gain with maternal body mass index, waist circumference, and blood pressure measured 16 y after pregnancy: The Avon Longitudinal Study of Parents and Children (ALSPAC). *Am.J.Clin.Nutr..* 2011. 93:1285-1292 |
| **A. G. Cramp and L. R. Brawley.**. Moms in motion: a group-mediated cognitive-behavioral physical activity intervention. 2006. 3:23 |
| **A. G. Cramp and S. R. Bray.**. Pre- and postnatal women's leisure time physical activity patterns: a multilevel longitudinal analysis. 2009. 80:403-411 |
| **A. G. El-Metwalli, A. M. Badawy, L. A. El-Baghdadi and A. El-Wehady.**. Occupational physical activity and pregnancy outcome. 2001. 100:41-45 |
| **A. Garshasbi and S. Faghih Zadeh.**. The effect of exercise on the intensity of low back pain in pregnant women. *International Journal of Gynaecology & Obstetrics.* 2005. 88:271-275 |
| **A. Gaston and C. A. Vamos.**. Leisure-time physical activity patterns and correlates among pregnant women in Ontario, Canada. *Maternal & Child Health Journal.* 2013. 17:477-484 |
| **A. Gaston and H. Prapavessis.**. Tired, moody and pregnant? Exercise may be the answer. 2013. 28:1353-1369 |
| **A. Gaston and H. Prapavessis.**. Using a combined protection motivation theory and health action process approach intervention to promote exercise during pregnancy. 2014. 37:173-184 |
| **A. Gaston, A. G. Cramp and H. Prapavessis.**. Pregnancy--should women put up their feet or lace up their running shoes?: Self-presentation and the exercise stereotype phenomenon during pregnancy. 2012. 34:223-237 |
| **A. Gollenberg, P. Pekow, G. Markenson, K. L. Tucker and L. Chasan-Taber.**. Dietary behaviors, physical activity, and cigarette smoking among pregnant Puerto Rican women. *Am.J.Clin.Nutr..* 2008. 87:1844-1851 |
| **A. Goodwin, J. Astbury and J. McMeeken.**. Body image and psychological well-being in pregnancy. A comparison of exercisers and non-exercisers. *Australian and New Zealand Journal of Obstetrics and Gynaecology.* 2000. 40:442-447 |
| **A. Goodwin, J. Astbury and J. McMeeken.**. Body image and psychological well-being in pregnancy. A comparison of exercisers and non-exercisers. 2000. 40:442-447 |
| **A. Goodwin, J. Astbury and J. McMeeken.**. Pregnancy: Does it change exercise participation?. 2000. 6:15-26 |
| **A. Gradmark, J. Pomeroy, F. Renstrom, et al.**. Physical activity may offset pregnancy-related insulin resistance. *Diabetologia.* 2010. 53:S276 |
| **A. Gradmark, J. Pomeroy, F. Renstrom, et al.**. Physical activity, sedentary behaviors, and estimated insulin sensitivity and secretion in pregnant and non-pregnant women. 2011. 11:44 |
| **A. Gradmark, J. Pomeroy, F. Renstrom, et al.**. PMC3130709; Physical activity, sedentary behaviors, and estimated insulin sensitivity and secretion in pregnant and non-pregnant women. *BMC Pregnancy & Childbirth.* 2011. 11:44 |
| **A. Gutke, H. C. Ostgaard and B. Oberg.**. Predicting persistent pregnancy-related low back pain. 2008. 33:E386-93 |
| **A. Hart, N. Morris, S. B. Osborn and H. P. Wright.**. Source: CLML. 5731:14586; Effective uterine bloodflow during exercise in normal and pre-eclamptic pregnancies. *Lancet.* 1956. 271:481-484 |
| **A. Himmelmann, A. Svensson, L. Sigstrom and L. Hansson.**. Predictors of blood pressure and left ventricular mass in the young: the Hypertension in Pregnancy Offspring Study. *American Journal of Hypertension.* 1994. 7:381-389 |
| **A. Hui, L. Back, S. Ludwig, et al.**. Exercise and dietary intervention increases physical activity, promotes healthy diet and reduces excessive gestational weight gain in pregnant women: A randomized controlled trial in Urban community. *Diabetes.* 2011. 60:A351 |
| **A. J. Agopian, P. J. Lupo, M. A. Canfield, L. E. Mitchell and Defects Prevention National Birth.**. Swimming pool use and birth defect risk. *American Journal of Obstetrics & Gynecology.* 2013. 209:219.e1-219.e9 |
| **A. J. Martin Campillo.**. Desarrollo motor del periodo prenatal al primer ano de vida, relacion conla Natacion. / Motor development from the prenatal period to the first year of life, relationship with Swimming. *Comunicaciones Tecnicas.* 1992. #volume#:5-19 |
| **A. Jakobovits.**. The effect of maternal physical activity on fetal breathing movements. *Arch.Gynecol..* 1983. 234:47-48 |
| **A. Jayasudha.**. Effect of antenatal exercises on labour outcome among primigravid mothers. *Nurs.J.India.* 2013. 104:10-13 |
| **A. Jayasudha.**. Effect of antenatal exercises on labour outcome among primigravid mothers. 2013. 104:10-13 |
| **A. Jukic, K. Evenson, J. Daniels, A. H. Herring, A. Wilcox and K. Hartmann.**. A prospective study of the association between vigorous physical activity during pregnancy and length of gestation and birthweight. *Am.J.Epidemiol..* 2010. 171:S33 |
| **A. K. Ertan, S. Schanz, H. A. Tanriverdi, R. Meyberg and W. Schmidt.**. Doppler examinations of fetal and uteroplacental blood flow in AGA and IUGR fetuses before and after maternal physical exercise with the bicycle ergometer. *J.Perinat.Med..* 2004. 32:260-265 |
| **A. K. Jenum, K. R. Richardsen, S. Berntsen and K. Morkrid.**. Gestational diabetes, insulin resistance and physical activity in pregnancy in a multi-ethnic population - a public health perspective. 2013. 23:45-54 |
| **A. K. Ronnberg, I. Ostlund, H. Fadl, T. Gottvall and K. Nilsson.**. Intervention during pregnancy to reduce excessive gestational weight gain-a randomised controlled trial. 2015. 122:537-544 |
| **A. Karabulut, A. U. Derbent, M. Yildirim, S. Simavli and N. O. Turhan.**. Evaluation of risk factors and effect of physical activity in caesarean section in nulliparous women. *Journal of Maternal-Fetal & Neonatal Medicine.* 2012. 25:1456-1459 |
| **A. Kariminia, M. E. Chamberlain, J. Keogh and A. Shea.**. PMC351839; Randomised controlled trial of effect of hands and knees posturing on incidence of occiput posterior position at birth. *BMJ.* 2004. 328:490 |
| **A. Kerssen, H. W. de Valk and G. H. Visser.**. Day-to-day glucose variability during pregnancy in women with Type 1 diabetes mellitus: glucose profiles measured with the Continuous Glucose Monitoring System. 2004. 111:919-924 |
| **A. Khaledan, S. Mirdar, N. S. Motahari Tabari and M. A. Shirvani.**. Effect of an Aerobic Exercise Program on Fetal Growth in Pregnant Women. *HAYAT.* 2010. 16:55-64 10p |
| **A. L. Brearley, M. Sherburn, M. P. Galea and S. J. Clarke.**. Pregnant women maintain body temperatures within safe limits during moderate-intensity aqua-aerobic classes conducted in pools heated up to 33 degrees Celsius: an observational study. 2015. 61:199-203 |
| **A. L. Deierlein, A. M. Siega-Riz and A. Herring.**. Dietary energy density but not glycemic load is associated with gestational weight gain. 2008. 88:693-699 |
| **A. L. Deierlein, A. Siega-Riz and K. R. Evenson.**. PMC3387759; Physical activity during pregnancy and risk of hyperglycemia. *Journal of Women's Health.* 2012. 21:769-775 |
| **A. L. Gollenberg, P. Pekow, E. Bertone-Johnson, P. S. Freedson, G. Markenson and L. Chasan-Taber.**. Physical activity and risk of small-for-gestational-age birth among predominantly Puerto Rican women. *Maternal & Child Health Journal.* 2011. 15:49-59 |
| **A. L. Gollenberg, P. Pekow, E. R. Bertone-Johnson, P. S. Freedson, G. Markenson and L. Chasan-Taber.**. Sedentary behaviors and abnormal glucose tolerance among pregnant Latina women. 2010. 42:1079-1085 |
| **A. L. Hui, L. Back, A. Reid, et al.**. Effects of physical activity and dietary intakes on weight gain of pregnant women with normal and above normal prepregnancy weight. *Canadian Journal of Diabetes.* 2012. 1):S8 |
| **A. L. Hui, S. Ludwig, P. Gardiner, et al.**. Exercise and dietary intervention during pregnancy results in reduced excessive gestational weight gain. *Diabetes.* 2010. Conference Publication: (var.pagings). |
| **A. L. Vallim, M. J. Osis, J. G. Cecatti, E. P. Baciuk, C. Silveira and S. R. Cavalcante.**. PMC3113331; Water exercises and quality of life during pregnancy. *Reproductive Health.* 2011. 8:14 |
| **A. Lee, J. Karpavicius, E. Gasparini and D. Forster.**. Implementing a diet and exercise program for limiting maternal weight gain in obese pregnant women: A pilot study. *Australian and New Zealand Journal of Obstetrics and Gynaecology.* 2012. 52:427-432 |
| **A. Lee, J. Karpavicius, E. Gasparini and D. Forster.**. Implementing a diet and exercise program for limiting maternal weight gain in obese pregnant women: a pilot study. 2012. 52:427-432 |
| **A. Lemos, A. I. de Souza, J. N. Figueiroa, J. E. Cabral-Filho and A. D. de Andrade.**. Respiratory muscle strength in pregnancy. 2010. 104:1638-1644 |
| **A. Lewkowitz, B. O'Donnell, S. Nakagawa, J. Vargas, Y. Cheng and M. Zlatnik.**. Social media messaging in pregnancy: How Text4Baby compares to popular smart phone applications. *Obstet.Gynecol..* 2014. 1):S249-S250 |
| **A. Liquori, G. Widener and L. Clark.**. Effects of a 6-week prenatal water exercise program on physiological parameters and well-being in women with pregnancies in the 2nd-3rd trimesters: a pilot study. *Journal of the Section on Women's Health.* 2003. 27:11-19 9p |
| **A. Lynch, C. Goodman, P. L. Choy, et al.**. Maternal physiological responses to swimming training during the second trimester of pregnancy. *Research in Sports Medicine.* 2007. 15:33-45 13p |
| **A. M. Jukic, D. A. Lawlor, M. Juhl, et al.**. Physical activity during pregnancy and language development in offspring. *Am.J.Epidemiol..* 2012. 175:S76 |
| **A. M. Jukic, K. R. Evenson, A. H. Herring, A. J. Wilcox, K. E. Hartmann and J. L. Daniels.**. NIHMS494001 PMC3749786; Correlates of physical activity at two time points during pregnancy. *Journal of Physical Activity & Health.* 2012. 9:325-335 |
| **A. M. Lynch, C. Goodman, P. L. Choy, et al.**. Maternal physiological responses to swimming training during the second trimester of pregnancy. 2007. 15:33-45 |
| **A. M. Lynch, S. McDonald, E. F. Magann, et al.**. Effectiveness and safety of a structured swimming program in previously sedentary women during pregnancy. *Journal of Maternal-Fetal & Neonatal Medicine.* 2003. 14:163-169 |
| **A. M. Paolone, M. Shangold, D. Paul, J. Minnitti and S. Weiner.**. Fetal heart rate measurement during maternal exercise--avoidance of artifact. *Medicine & Science in Sports & Exercise.* 1987. 19:605-609 |
| **A. M. Petersen, T. L. Leet and R. C. Brownson.**. Correlates of physical activity among pregnant women in the United States. *Medicine & Science in Sports & Exercise.* 2005. 37:1748-1753 6p |
| **A. M. Stuebe, E. Oken, M. W. Gillman, Alison M. Stuebe, Emily Oken and Matthew W. Gillman.**. Associations of diet and physical activity during pregnancy with risk for excessive gestational weight gain. *American Journal of Obstetrics & Gynecology.* 2009. 201:58.e8 |
| **A. M. Wallace, D. B. Boyer, A. Dan and K. Holm.**. Aerobic exercise, maternal self-esteem, and physical discomforts during pregnancy. 1986. 31:255-262 |
| **A. M. Z. Jukic, K. R. Evenson, A. H. Herring, A. J. Wilcox, K. E. Hartmann and J. L. Daniels.**. Correlates of physical activity at two time points during pregnancy. 2012. 9:325-335 |
| **A. MacPhail, G. A. Davies, R. Victory and L. A. Wolfe.**. Maximal exercise testing in late gestation: fetal responses. *Obstetrics & Gynecology.* 2000. 96:565-570 |
| **A. Merkx, M. Ausems, L. Bude, R. de Vries and M. J. Nieuwenhuijze.**. Weight gain in healthy pregnant women in relation to pre-pregnancy BMI, diet and physical activity. *Midwifery.* 2015. 31:693-701 |
| **A. Nakagaki, T. Inami, T. Minoura, R. Baba, S. Iwase and M. Sato.**. Differences in autonomic neural activity during exercise between the second and third trimesters of pregnancy. *Journal of Obstetrics & Gynaecology Research.* 2016. 28:28 |
| **A. Nakagaki, T. Inami, T. Minoura, R. Baba, S. Iwase and M. Sato.**. Differences in autonomic neural activity during exercise between the second and third trimesters of pregnancy. *Journal of Obstetrics & Gynaecology Research.* 2016. 42:951-959 |
| **A. Nieto, R. Matorras, M. Serra, P. Valenzuela and J. Molero.**. Multivariate analysis of determinants of fetal growth retardation. *European Journal of Obstetrics, Gynecology, & Reproductive Biology.* 1994. 53:107-113 |
| **A. Opala-Berdzik, B. Bacik, A. Markiewicz, et al.**. Comparison of static postural stability in exercising and non-exercising women during the perinatal period. *Medical Science Monitor.* 2014. 20:1865-1870 |
| **A. P. Heenan and L. A. Wolfe.**. Plasma acid-base regulation above and below ventilatory threshold in late gestation. *J.Appl.Physiol..* 2000. 88:149-157 |
| **A. P. Heenan and L. A. Wolfe.**. Plasma acid-base regulation above and below ventilatory threshold in late gestation. 2000. 88:149-157 |
| **A. P. Heenan and L. A. Wolfe.**. Plasma osmolality and the strong ion difference predict respiratory adaptations in pregnant and nonpregnant women. 2003. 81:839-847 |
| **A. P. Heenan, L. A. Wolfe and G. A. Davies.**. Maximal exercise testing in late gestation: maternal responses. *Obstetrics & Gynecology.* 2001. 97:127-134 |
| **A. P. Heenan, L. A. Wolfe and G. A. Davies.**. Maximal exercise testing in late gestation: maternal responses. 2001. 97:127-134 |
| **A. P. Heenan, L. A. Wolfe, G. A. Davies and M. J. McGrath.**. Effects of human pregnancy on fluid regulation responses to short-term exercise. *J.Appl.Physiol..* 2003. 95:2321-2327 |
| **A. P. Koemeester, J. P. Broersen and P. E. Treffers.**. Physical work load and gestational age at delivery. 1995. 52:313-315 |
| **A. P. Koemeester, J. P. Broersen and P. E. Treffers.**. PMC1128222; Physical work load and gestational age at delivery. *Occupational & Environmental Medicine.* 1995. 52:313-315 |
| **A. R. A. Adegboye, S. Rossner, M. Neovius, P. M. C. Lourenço and Y. Linné.**. Relationships between prenatal smoking cessation, gestational weight gain and maternal lifestyle characteristics. 2010. 23:29-35 7 |
| **A. Rakhshani, R. Nagarathna, R. Mhaskar, A. Mhaskar, A. Thomas and S. Gunasheela.**. PMC4320907; Effects of yoga on utero-fetal-placental circulation in high-risk pregnancy: a randomized controlled trial. *Advances in Preventive Medicine.* 2015. 2015:373041 |
| **A. Rakhshani, S. Maharana, N. Raghuram, H. R. Nagendra and P. Venkatram.**. Effects of integrated yoga on quality of life and interpersonal relationship of pregnant women. *Quality of life research.* 2010. 19:1447-1455 |
| **A. Restall, R. S. Taylor, J. M. Thompson, et al.**. PMC4065732; Risk factors for excessive gestational weight gain in a healthy, nulliparous cohort. *Journal of Obesity.* 2014. 2014:148391 |
| **A. Robledo-Colonia, N. Sandoval-Restrepo, Y. Mosquera-Valderrama, C. Escobar-Hurtado and R. Ramirez-Velez.**. Aerobic exercise training during pregnancy reduces depressive symptoms in nulliparous women: a randomised trial. *Journal of Physiotherapy.* 2012. 58:9-15 |
| **A. Rodriguez and G. Bohlin.**. Psychosocial predictors of smoking and exercise during pregnancy. 2000. 18:203-223 |
| **A. S. Cavalli and T. Tanaka.**. PMC2723239; Relationship between maternal physical activities and preterm birth. *Environmental Health & Preventive Medicine.* 2001. 6:74-81 |
| **A. S. Cavalli and T. Tanaka.**. PMC2723549; Maternal leisure-time physical activities are not determinant risk factors of low birthweight babies: A cross-sectional study of 1,714 pregnant women. *Environmental Health & Preventive Medicine.* 2000. 5:72-80 |
| **A. S. Tenforde, K. E. Toth, E. Langen, M. Fredericson and K. L. Sainani.**. PMC4332642 Available on 03/01/16]; Running habits of competitive runners during pregnancy and breastfeeding. *Sports Health.* 2015. 7:172-176 |
| **A. Sijtsma, P. J. J. Sauer and E. Corpeleijn.**. Parental correlations of physical activity and body mass index in young children- the GECKO Drenthe cohort. *International Journal of Behavioral Nutrition and Physical Activity.* 2015. 12 |
| **A. Spinillo, E. Capuzzo, F. Baltaro, G. Piazza, S. Nicola and A. Iasci.**. The effect of work activity in pregnancy on the risk of fetal growth retardation. *Acta Obstet.Gynecol.Scand..* 1996. 75:531-536 |
| **A. Spinillo, E. Capuzzo, L. Colonna, G. Piazzi, S. Nicola and F. Baltaro.**. The effect of work activity in pregnancy on the risk of severe preeclampsia. 1995. 35:380-385 |
| **A. Suputtitada, T. Wacharapreechanont and P. Chaisayan.**. Effect of the "sitting pelvic tilt exercise" during the third trimester in primigravidas on back pain. *Journal of the Medical Association of Thailand.* 2002. 85 Suppl 1:S170-9 |
| **A. U. Derbent, A. Karabulut, M. Yildirim, S. A. Simavli and N. O. Turhan.**. Evaluation of risk factors in cesarean delivery among multiparous women with a history of vaginal delivery. 2012. 13:15-20 |
| **A. V. M. Arizabaleta, L. O. Buitrago, de Plata, A. C. A., M. M. Escudero and R. Ram**. Aerobic exercise during pregnancy improves health-related quality of life: A randomised trial. 2010. 56:253-258 |
| **A. W. Bingham.**. The prevention of obstetric complications by diet and exercise. 1932. 23:38-47 |
| **A. Williams, T. Reilly, I. Campbell and J. Sutherst.**. Investigation of changes in responses to exercise and in mood during pregnancy. 1988. 31:1539-1549 |
| **A. Wojtyla, L. Kapka-Skrzypczak, P. Bilinski and P. Paprzycki.**. Physical activity among women at reproductive age and during pregnancy (Youth Behavioural Polish Survey - YBPS and Pregnancy-related Assessment Monitoring Survay - PrAMS) - epidemiological population studies in Poland during the period 2010-2011. *Annals of Agricultural and Environmental Medicine.* 2011. 18:365-374 |
| **A. Wojtyla, L. Kapka-Skrzypczak, P. Bilinski and P. Paprzycki.**. Physical activity among women at reproductive age and during pregnancy (Youth Behavioural Polish Survey - YBPS and Pregnancy-related Assessment Monitoring Survay - PrAMS) - epidemiological population studies in Poland during the period 2010-2011. 2011. 18:365-374 |
| **A. Wojtyla, L. Kapka-Skrzypczak, P. Paprzycki, M. Skrzypczak and P. Bilinski.**. Epidemiological studies in Poland on effect of physical activity of pregnant women on the health of offspring and future generations - adaptation of the hypothesis development origin of health and diseases. *Annals of Agricultural & Environmental Medicine.* 2012. 19:315-326 |
| **A. Wojtyla, L. Kapka-Skrzypczak, P. Paprzycki, M. Skrzypczak and P. Bilinski.**. Epidemiological studies in Poland on effect of physical activity of pregnant women on the health of offspring and future generations - adaptation of the hypothesis development origin of health and diseases. 2012. 19:315-326 |
| **Akhgar Ghassabian, Rajeshwari Sundaram, Amanda Wylie, Erin Bell, Scott C. Bello and Edwina Yeung.**. Maternal medical conditions during pregnancy and gross motor development up to age 24 months in the Upstate KIDS study. *Developmental Medicine & Child Neurology.* 2016. 58:728-734 |
| **Akihito Takeuchi, Takashi Yorifuji, Kyohei Takahashi, et al.**. Neurodevelopment in full-term small for gestational age infants: A nationwide japanese population-based study. *Brain Dev..* 2016. 38:529-537 |
| **Alison Tovar, Lauren B. Guthrie, Deborah Platek, Alison Stuebe, Sharon J. Herring and Emily Oken.**. Modifiable predictors associated with having a gestational weight gain goal. 2011. 15:1119-1126 |
| **Anca Gaston, Philip M. Wilson, Diane E. Mack, Stephanie Elliot and Harry Prapavessis.**. Understanding physical activity behavior and cognitions in pregnant women: An application of self-determination theory. 2013. 14:405-412 |
| **André Michael Toschke, Simon Rückinger, Eva Böhler and Rüdiger Von Kries.**. Adjusted population attributable fractions and preventable potential of risk factors for childhood obesity. 2007. 10:902-906 5 |
| **Anja Podlesnik Fetih, Mateja Videmšek, Vislava Globevnik Velikonja, Eda Bokal Vrtačnik and Damir Karpljuk.**. The state of mind of less physically active and regularly physically active women in the second trimester of their pregnancies. / duševní stay málo a pravidelnĕ tĕlesnĕ akitvních žen ve druhém tremestru tĕhotenstí. 2008. 38:37-44 |
| **Anonymous**. Acute Maternal and Fetal Effects of Exercise in Pregnancy. *Clinical Trials.* 2011. #volume# |
| **Anonymous**. Descriptive Epidemiology of Objectively Measured Walking Among US Pregnant Women: National Health and Nutrition Examination Survey, 2005-2006. 2015. 12:1-6 6 |
| **Anonymous**. Effectiveness of Video Messaging About Diet, Exercise and Weight Gain in Pregnancy in Regional and National Samples. *Clinical Trials.* 2015. #volume# |
| **Anonymous**. Effects on postpartum weight retention after antenatal lifestyle intervention - a secondary analysis of a randomized controlled trial. *Acta Obstet.Gynecol.Scand..* 2016. 95:999-1007 |
| **Anonymous**. Exercise in pregnancy does not increase preterm birth risk. *Clinical Advisor.* 2016. 19:16 |
| **Anonymous**. Exercise Training in Pregnancy for Obese Mothers. *Clinical Trials.* 2010. #volume# |
| **Anonymous**. Fitness programs benefit mothers-to-be, heart patients. *Health Prog..* 1985. 66:74-75 |
| **Anonymous**. Maternal condition and exercise during pregnancy benefit the unborn well being and labor. 2008. 26:51-58 8 |
| **Anonymous**. Pelvic floor muscle exercises. 2001. 87:650 |
| **Anonymous**. Pregnant women advised to consider exercise risks. (Les femmes enceintes doivent prendre en compte les dangers du sport). *Physician & Sportsmedicine.* 1982. 10:27 |
| **Anonymous**. Pregnant women who swim at reduced risk of preterm birth. *Nursing Standard.* 2010. 24:17 |
| **Anonymous**. Role of Maternal Physical Exercise on Spontaneous Labor Onset. *Clinical Trials.* 2015. #volume# |
| **Anonymous**. What is the effect of regular group exercise on maternal psychological outcomes and common pregnancy complaints? An assessor blinded RCT. 2016. 32:81-86 6 |
| **Arati Mahishale and Shobhana Patted.**. Effectiveness of Tailor Made Exercise Intervention for Low Back Pain and Pelvic Pain during Pregnancy - A Randomized Controlled Trial. 2014. 8:143-148 6 |
| **Avaya Banerjee, V. Mahalakshmi and R. Baranitharan.**. Effect of Antenatal Exercise Program with and without Abdominal Strengthening Exercises on Diastasis Rectus Abdominis - A Post Partum Follow Up. 2013. 7:123-126 4 |
| **B. A. Lewis, B. C. Martinson, N. E. Sherwood and M. D. Avery.**. A pilot study evaluating a telephone-based exercise intervention for pregnant and postpartum women. *J.Midwifery Womens Health.* 2011. 56:127-131 |
| **B. A. Lewis, B. C. Martinson, N. E. Sherwood and M. D. Avery.**. A pilot study evaluating a telephone-based exercise intervention for pregnant and postpartum women. 2011. 56:127-131 |
| **B. A. Meyer and J. R. Daling.**. Activity level of mother's usual occupation and low infant birth weight. *Journal of Occupational Medicine.* 1985. 27:841-847 |
| **B. A. Meyer and J. R. Daling.**. Activity level of mother's usual occupation and low infant birth weight. 1985. 27:841-847 |
| **B. Banerjee, T. K. Dey and P. Chatterjee.**. Estimation of risk of pregnancy wastage due to lifting of heavy weight during pregnancy. *Indian Journal of Occupational and Environmental Medicine.* 2002. 6:13-15 |
| **B. Banerjee, T. K. Dey and P. Chatterjee.**. Estimation of risk of pregnancy wastage due to lifting of heavy weight during pregnancy. 2002. 6:13-15 |
| **B. Banerjee, T. K. Dey and P. Chatterjee.**. Work related physical exertion and spontaneous abortion. *Indian J.Public Health.* 2005. 49:248-249 |
| **B. Banerjee, T. K. Dey and P. Chatterjee.**. Work related physical exertion and spontaneous abortion. 2005. 49:248-249 |
| **B. Bennett and O. D. Ratnoff.**. Changes in antihemophilic factor (AHF, factor 8) procoagulant activity and AHF-like antigen in normal pregnancy, and following exercise and pneumoencephalography. *J.Lab.Clin.Med..* 1972. 80:256-263 |
| **B. Chakaravertty, K. Parkavi, S. A. Coumary and A. J. Felix.**. Antepartum cardiorespiratory fitness (CRF) quantification by estimation of maximal oxygen consumption (Vo2 max) in pregnant South Indian women. 2012. 110:214-217 |
| **B. Eskenazi, L. Fenster, S. Wight, P. English, G. C. Windham and S. H. Swan.**. Physical exertion as a risk factor for spontaneous abortion. 1994. 5:6-13 |
| **B. Feiner, R. Weksler, G. Ohel and S. Degani.**. The influence of maternal exercise on placental blood flow measured by Simultaneous Multigate Spectral Doppler Imaging (SM-SDI). *Ultrasound in Obstetrics & Gynecology.* 2000. 15:498-501 |
| **B. G. Armstrong, A. D. Nolin and A. D. McDonald.**. PMC1009753; Work in pregnancy and birth weight for gestational age. *Br.J.Ind.Med..* 1989. 46:196-199 |
| **B. G. Armstrong, A. D. Nolin and A. D. McDonald.**. Work in pregnancy and birth weight for gestational age. 1989. 46:196-199 |
| **B. Hackley, H. P. Kennedy, D. C. Berry and G. D. Melkus.**. A mixed-methods study on factors influencing prenatal weight gain in ethnic-minority women. 2014. 59:388-398 |
| **B. L. Rooney, C. W. Schauberger and M. A. Mathiason.**. Impact of perinatal weight change on long-term obesity and obesity-related illnesses. 2005. 106:1349-1356 |
| **B. Laraia, L. Messer, K. Evenson and J. S. Kaufman.**. PMC2232039; Neighborhood factors associated with physical activity and adequacy of weight gain during pregnancy. *Journal of Urban Health.* 2007. 84:793-806 |
| **B. Longo-Mbenza, K. B. Tshimanga, B. Buassa-bu-Tsumbu and M. J. Kabangu.**. Diets rich in vegetables and physical activity are associated with a decreased risk of pregnancy induced hypertension among rural women from Kimpese, DR Congo. *Nigerian Journal of Medicine: Journal of the National Association of Resident Doctors of Nigeria.* 2008. 17:265-269 |
| **B. Longo-Mbenza, K. B. Tshimanga, B. Buassa-bu-Tsumbu and M. J. Kabangu.**. Diets rich in vegetables and physical activity are associated with a decreased risk of pregnancy induced hypertension among rural women from Kimpese, DR Congo. 2008. 17:265-269 |
| **B. Melton, E. Marshall, H. Bland, M. Schmidt and W. K. Guion.**. American rural women's exercise self-efficacy and awareness of exercise benefits and safety during pregnancy. 2013. 15:468-473 |
| **B. Neme, I. Behle and A. U. Dos Santos.**. Effects of exercise test on the fetal heart in pregnancies complicated by hypertensive syndrome. Portuguese]. *Maternidade e Infancia.* 1973. 32:323-330 |
| **B. Richardson, K. Campbell, L. Carmichael and J. Patrick.**. Effects of external physical stimulation on fetuses near term. *Obstet.Gynecol..* 1981. 139:344-352 |
| **B. Richardson, K. Campbell, L. Carmichael and J. Patrick.**. Effects of external physical stimulation on fetuses near term. 1981. 139:344-352 |
| **B. S. Fjeldsoe, Y. D. Miller and A. L. Marshall.**. MobileMums: a randomized controlled trial of an SMS-based physical activity intervention. 2010. 39:101-111 |
| **B. Sandstrom.**. Adjustments of the circulation to orthostatic reaction and physical exercise during the first trimester of primipregnancy. 1974. 53:1-5 |
| **B. Sangsawang and N. Sangsawang.**. Is a 6-week supervised pelvic floor muscle exercise program effective in preventing stress urinary incontinence in late pregnancy in primigravid women?: a randomized controlled trial. *European Journal of Obstetrics, Gynecology, & Reproductive Biology.* 2016. 197:103-110 |
| **B. Sangsawang and Y. Serisathien.**. Effect of pelvic floor muscle exercise programme on stress urinary incontinence among pregnant women. *J.Adv.Nurs..* 2012. 68:1997-2007 |
| **B. Sangsawang and Y. Serisathien.**. Effect of pelvic floor muscle exercise programme on stress urinary incontinence among pregnant women. 2012. 68:1997-2007 |
| **B. Sangsawang and Y. Serisathien.**. Effect of pelvic floor muscle exercise programme on stress urinary incontinence among pregnant women. *J.Adv.Nurs..* 2012. 68:1997-2007 |
| **B. Sternfeld, C. P. Quesenberry, B. Eskenazi and L. A. Newman.**. Exercise during pregnancy and pregnancy outcome. / Pratique de l ' exercice physique pendant la grossesse et son incidence sur la grossesse. *Medicine & Science in Sports & Exercise.* 1995. 27:634-640 |
| **B. W. Alderman, H. Zhao, V. L. Holt, D. H. Watts and S. A. A. Beresford.**. Maternal physical activity in pregnancy and infant size for gestational age. *Ann.Epidemiol..* 1998. 8:513-519 |
| **B. W. Alderman, H. Zhao, V. L. Holt, D. H. Watts and S. A. Beresford.**. Maternal physical activity in pregnancy and infant size for gestational age. *Ann.Epidemiol..* 1998. 8:513-519 |
| **Brad Schoenfeld and Gul Tiryaki-Sonmez.**. Overcoming Psychosocial Barriers to Maternal Exercise: Intervention Strategies to Improve Participation and Adherence. 2011. 3:61-66 |
| **Brazil University of Campinas.**. Physical Exercise Influence Among Overweight and Obese Pregnant Women. 2010. #volume# |
| **C. A. Collings, L. B. Curet and J. P. Mullin.**. Maternal and fetal responses to a maternal aerobic exercise program. *American Journal of Obstetrics & Gynecology.* 1983. 145:702-707 |
| **C. A. Guzman and R. Caplan.**. Cardiorespiratory response to exercise during pregnancy. *Obstet.Gynecol..* 1970. 108:600-605 |
| **C. A. Guzman and R. Caplan.**. Cardiorespiratory response to exercise during pregnancy. 1970. 108:600-605 |
| **C. A. Guzman, R. Caplan and M. R. Becklake.**. Cardiorespiratory response to exercise during pregnancY. 1969. 28:786-& |
| **C. A. Hickey, S. P. Cliver, F. X. Mulvihill, S. F. McNeal, H. J. Hoffman and R. L. Goldenberg.**. Employment-related stress and preterm delivery: a contextual examination. 1995. 110:410-418 |
| **C. A. Nielsen, I. Sigsgaard, M. Olsen, M. Tolstrup, B. Danneskiold-Samsoee and J. E. Bock.**. Trainability of the pelvic floor. A prospective study during pregnancy and after delivery. 1988. 67:437-440 |
| **C. A. Snijder, T. Brand, V. Jaddoe, et al.**. Physically demanding work, fetal growth and the risk of adverse birth outcomes. The Generation R Study. *Occupational & Environmental Medicine.* 2012. 69:543-550 |
| **C. A. Snijder, T. Brand, V. Jaddoe, et al.**. Physically demanding work, fetal growth and the risk of adverse birth outcomes. The Generation R Study. 2012. 69:543-550 |
| **C. A. Vamos, S. Flory, H. Sun, et al.**. Do Physical Activity Patterns Across the Lifecourse Impact Birth Outcomes?. 2015. 19:1775-1782 |
| **C. Abeysena and P. Jayawardana.**. Sleep deprivation, physical activity and low income are risk factors for inadequate weight gain during pregnancy: a cohort study. 2011. 37:734-740 |
| **C. Abeysena and P. Jayawardana.**. Sleep deprivation, physical activity and low income are risk factors for inadequate weight gain during pregnancy: A cohort study. *J.Obstet.Gynaecol.Res..* 2011. 37:734-740 |
| **C. Abeysena, P. Jayawardana and A. Seneviratne Rde.**. Effect of psychosocial stress and physical activity on preterm birth: a cohort study. *Journal of Obstetrics & Gynaecology Research.* 2010. 36:260-267 |
| **C. Abeysena, P. Jayawardana and A. Seneviratne Rde.**. Effect of psychosocial stress and physical activity on low birthweight: a cohort study. *Journal of Obstetrics & Gynaecology Research.* 2010. 36:296-303 |
| **C. Abeysena, P. Jayawardana and R. D. A. Seneviratne.**. Effect of psychosocial stress and physical activity on low birthweight: A cohort study. *J.Obstet.Gynaecol.Res..* 2010. 36:296-303 |
| **C. Albright, J. E. Maddock and C. R. Nigg.**. Physical activity before pregnancy and following childbirth in a multiethnic sample of healthy women in Hawaii. 2005. 42:95-110 |
| **C. Amezcua-Prieto, P. Lardelli-Claret, R. Olmedo-Requena, J. Mozas-Moreno, A. Bueno-Cavanillas and J. J. Jimenez-Moleon.**. Compliance with leisure-time physical activity recommendations in pregnant women. 2011. 90:245-252 |
| **C. B. Eaton, J. Maccani, G. Agha, et al.**. Adverse early life exposures and carotid atherosclerosis in midlife: Leap study. *Circulation.* 2014. 129 |
| **C. B. Olsson, L. Nilsson-Wikmar and W. J. Grooten.**. Determinants for lumbopelvic pain 6 months postpartum. 2012. 34:416-422 |
| **C. B. Rudra, T. K. Sorensen, D. A. Luthy and M. A. Williams.**. A prospective analysis of recreational physical activity and preeclampsia risk. *Med.Sci.Sports Exerc..* 2008. 40:1581-1588 |
| **C. B. Rudra, T. K. Sorensen, D. A. Luthy and M. A. Williams.**. A prospective analysis of recreational physical activity and preeclampsia risk. 2008. 40:1581-1588 |
| **C. Bish, S. Chu, C. Shapiro-Mendoza, A. Sharma and H. M. Blanck.**. Trying to lose or maintain weight during pregnancy -- United States, 2003. 2009. 13:286-292 7 |
| **C. Botkin and C. E. Driscoll.**. Maternal aerobic exercise: newborn effects. *Fam.Pract.Res.J..* 1991. 11:387-393 |
| **C. C. D. Perkins, J. M. Pivarnik, N. Paneth and A. D. Stein.**. Physical activity and fetal growth during pregnancy. *Obstet.Gynecol..* 2007. 109:81-87 |
| **C. C. M. Röst, J. Jacqueline, A. Kaiser, A. P. Verhagen and B. W. Koes.**. Pelvic pain during pregnancy: a descriptive study of signs and symptoms of 870 patients in primary care. 2004. 29:2567-2572 6 |
| **C. C. Perkins, J. M. Pivarnik, N. Paneth and A. D. Stein.**. Physical activity and fetal growth during pregnancy.Erratum appears in Obstet Gynecol. 2007 Apr;109(4):1002 Note: Stein, Aryeth D corrected to Stein, Aryeh D]]. *Obstetrics & Gynecology.* 2007. 109:81-87 |
| **C. Coll, M. Domingues, I. Santos, A. Matijasevich, B. L. Horta and P. C. Hallal.**. Changes in Leisure-Time Physical Activity From the Prepregnancy to the Postpartum Period: 2004 Pelotas (Brazil) Birth Cohort Study. *Journal of Physical Activity & Health.* 2016. 13:361-365 |
| **C. Collings and L. B. Curet.**. Fetal heart rate response to maternal exercise. *American Journal of Obstetrics & Gynecology.* 1985. 151:498-501 |
| **C. D. Peterson, M. Haas and W. T. Gregory.**. A pilot randomized controlled trial comparing the efficacy of exercise, spinal manipulation, and neuro emotional technique for the treatment of pregnancy-related low back pain. 2012. 20:18 |
| **C. de Oliveira, M. A. Lopes, Carla Longo e Pereira, L. and M. Zugaib.**. Effects of pelvic floor muscle training during pregnancy. 2007. 62:439-446 |
| **C. Dominguez de Costa, A. Lerdo de Tejada, P. Eisenberg de Smoler, et al.**. [Decrease of Ac. 5-HIA excretion in urine induced by exercise in pregnant women]. 1978. 44:347-353 |
| **C. E. Mbada, O. E. Adebayo, A. B. Adeyemi, et al.**. Knowledge and Attitude of Nigerian Pregnant Women towards Antenatal Exercise: A Cross-Sectional Survey. 2014. 2014:260539 |
| **C. E. Mbada, O. E. Adebayo, T. O. Awotidebe, et al.**. Practice and pattern of antenatal and postnatal exercise among Nigerian women: A cross-sectional study. 2015. 3:93-98 |
| **C. Elliott, S. Houghton and S. Langsford.**. The use of visual prompts to increase kegel exercise performance in pregnant women: A case study. 1997. 14:231-235 |
| **C. F. Lee, F. M. Hwang, H. M. Lin, L. K. Chi and L. Y. Chien.**. The Physical Activity Patterns of Pregnant Taiwanese Women. *Journal of Nursing Research.* 2016. 24:291-299 |
| **C. F. Lee, I. C. Chiang, F. M. Hwang, L. K. Chi and H. M. Lin.**. Using the Theory of Planned Behavior to predict pregnant women's intention to engage in regular exercise. *Midwifery.* 2016. 42:80-86 |
| **C. F. Yan, Y. C. Hung, M. L. Gau and K. C. Lin.**. Effects of a stability ball exercise programme on low back pain and daily life interference during pregnancy. *Midwifery.* 2014. 30:412-419 |
| **C. F. Yan, Y. C. Hung, M. L. Gau and K. C. Lin.**. Effects of a stability ball exercise programme on low back pain and daily life interference during pregnancy. 2014. 30:412-419 |
| **C. Ferreira, H. Dutra, L. Dias, et al.**. Heart rate and blood pressure in response to pelvic floor muscle training during pregnancy. *Int.Urogynecol.J.Pelvic Floor Dysfunct..* 2011. 22:S1471-S1472 |
| **C. Fleten, H. Stigum, P. Magnus and W. Nystad.**. Exercise during pregnancy, maternal prepregnancy body mass index, and birth weight. *Obstetrics & Gynecology.* 2010. 115:331-337 |
| **C. G. Dominguez, P. E. De Smoler, J. Armas Dominguez, S. Karchmer and D. Skromne.**. Electrocardiography, stress and the third pregnancy trimester]. *Arch.Inst.Cardiol.Mex..* 1976. 46:74-81 |
| **C. H. Chuang, M. R. Stengel, S. W. Hwang, D. Velott, K. H. Kjerulff and J. L. Kraschnewski.**. Behaviours of overweight and obese women during pregnancy who achieve and exceed recommended gestational weight gain. 2014. 8:e577-83 |
| **C. H. Ferreira, L. M. Naldoni, S. Ribeiro Jdos, M. C. Meirelles, C. Cavalli Rde and K. Bo.**. Maternal blood pressure and heart rate response to pelvic floor muscle training during pregnancy. 2014. 93:678-683 |
| **C. H. Ferreira, L. M. V. Naldoni, J. D. S. Ribeiro, M. C. C. C. Meirelles, R. D. C. Cavalli and K. Bo.**. Maternal blood pressure and heart rate response to pelvic floor muscle training during pregnancy. *Acta Obstet.Gynecol.Scand..* 2014. 93:678-683 |
| **C. J. Homer, S. A. Beresford, S. A. James, E. Siegel and S. Wilcox.**. Work-related physical exertion and risk of preterm, low birthweight delivery. *Paediatr.Perinat.Epidemiol..* 1990. 4:161-174 |
| **C. J. Homer, S. A. Beresford, S. A. James, E. Siegel and S. Wilcox.**. Work-related physical exertion and risk of preterm, low birthweight delivery. 1990. 4:161-174 |
| **C. J. Spaaij, J. M. van Raaij, L. C. de Groot, van der Heijden, L. J., H. A. Boekholt and J. G. Hautvast.**. No changes during pregnancy in the net cost of cycling exercise. 1994. 48:513-521 |
| **C. J. Vladutiu, K. R. Evenson and S. W. Marshall.**. Physical Activity and Injuries During Pregnancy. *Journal of Physical Activity & Health.* 2010. 7:761-769 |
| **C. J. Vladutiu, K. R. Evenson and S. W. Marshall.**. Physical activity and injuries during pregnancy. 2010. 7:761-769 |
| **C. Kim, L. N. McEwen, E. C. Kieffer, W. H. Herman and J. D. Piette.**. NIHMS614289 PMC4139034; Self-efficacy, social support, and associations with physical activity and body mass index among women with histories of gestational diabetes mellitus. *Diabetes Educ..* 2008. 34:719-728 |
| **C. Kim, M. Draska, M. L. Hess, E. J. Wilson and C. R. Richardson.**. NIHMS614297 PMC4139030; A web-based pedometer programme in women with a recent history of gestational diabetes. *Diabetic Med..* 2012. 29:278-283 |
| **C. L. Battle, L. A. Uebelacker, S. R. Magee, K. A. Sutton and I. W. Miller.**. NIHMS658326 Available on 03/01/16] PMC4393850 Available on 03/01/16]; Potential for prenatal yoga to serve as an intervention to treat depression during pregnancy. *Womens Health Issues.* 2015. 25:134-141 |
| **C. L. Battle, L. A. Uebelacker, S. R. Magee, K. A. Sutton and I. W. Miller.**. Potential for prenatal yoga to serve as an intervention to treat depression during pregnancy. 2015. 25:134-141 |
| **C. L. Butler, M. A. Williams, T. K. Sorensen, I. O. Frederick and W. M. Leisenring.**. Relation between maternal recreational physical activity and plasma lipids in early pregnancy. *Am.J.Epidemiol..* 2004. 160:350-359 |
| **C. L. Butler, M. A. Williams, T. K. Sorensen, I. O. Frederick and W. M. Leisenring.**. Relation between maternal recreational physical activity and plasma lipids in early pregnancy. 2004. 160:350-359 |
| **C. L. Harrison, C. B. Lombard and H. J. Teede.**. Limiting postpartum weight retention through early antenatal intervention: the HeLP-her randomised controlled trial. 2014. 11:134 |
| **C. L. Harrison, C. B. Lombard and H. J. Teede.**. PMC4221718; Limiting postpartum weight retention through early antenatal intervention: the HeLP-her randomised controlled trial. *International Journal of Behavioral Nutrition & Physical Activity.* 2014. 11:134 |
| **C. L. Harrison, C. B. Lombard and H. J. Teede.**. Understanding early pregnancy health behaviours among overweight and obese women at risk of gestational diabetes mellitus. *Obesity Research and Clinical Practice.* 2011. 5:S27 |
| **C. L. Harrison, C. B. Lombard and H. J. Teede.**. Understanding health behaviours in a cohort of pregnant women at risk of gestational diabetes mellitus: an observational study. *BJOG: An International Journal of Obstetrics & Gynaecology.* 2012. 119:731-738 |
| **C. L. Harrison, C. B. Lombard, B. J. Strauss and H. J. Teede.**. Optimizing healthy gestational weight gain in women at high risk of gestational diabetes: a randomized controlled trial. *Obesity.* 2013. 21:904-909 |
| **C. L. Harrison, C. B. Lombard, B. J. Strauss and H. J. Teede.**. Optimizing healthy gestational weight gain in women at high risk of gestational diabetes: a randomized controlled trial.Erratum appears in Obesity (Silver Spring). 2016 Jan;24(1):268; PMID: 26692583]. *Obesity.* 2013. 21:904-909 |
| **C. L. Harrison, R. G. Thompson, H. J. Teede and C. B. Lombard.**. Measuring physical activity during pregnancy. *International Journal of Behavioral Nutrition and Physical Activity.* 2011. 8 |
| **C. L. Nesler, S. L. Hassett, S. Cary and J. Brooke.**. Effects of supine exercise on fetal heart rate in the second and third trimesters. *Am.J.Perinatol..* 1988. 5:159-163 |
| **C. M. Chiarello, L. A. Falzone, K. E. McCaslin, M. N. Patel and K. R. Ulery.**. The effects of an exercise program on diastasis recti abdominis in pregnant women [corrected] [published erratum appears in J WOMENS HEALTH PHYS THER 2005;29(3):76]. 2005. 29:11-16 6 |
| **C. M. Cottrill, J. M. Kotchen, G. Guthrie and T. Kotchen.**. Cardiovascular responses to exercise following adolescent hypertensive pregnancy. *Journal of Adolescent Health Care.* 1980. 1:91-95 |
| **C. M. Devine, C. F. Bove and C. M. Olson.**. Continuity and change in women's weight orientations and lifestyle practices through pregnancy and the postpartum period: the influence of life course trajectories and transitional events. 2000. 50:567-582 |
| **C. M. Olson and M. S. Strawderman.**. Modifiable behavioral factors in a biopsychosocial model predict inadequate and excessive gestational weight gain. 2003. 103:48-54 |
| **C. M. Olson, M. S. Strawderman, P. S. Hinton and T. A. Pearson.**. Gestational weight gain and postpartum behaviors associated with weight change from early pregnancy to 1 y postpartum. *International Journal of Obesity & Related Metabolic Disorders: Journal of the International Association for the Study of Obesity.* 2003. 27:117-127 |
| **C. M. Sampselle, J. M. Miller, B. L. Mims, J. O. Delancey, J. A. Ashton-Miller and C. L. Antonakos.**. Effect of pelvic muscle exercise on transient incontinence during pregnancy and after birth. 1998. 91:406-412 |
| **C. Mattocks, A. Ness, K. Deere, et al.**. Early life determinants of physical activity in 11 to 12 year olds: cohort study. 2008. 336:26-29 |
| **C. McParlin, S. C. Robson, P. W. G. Tennant, et al.**. Objectively measured physical activity during pregnancy: A study in obese and overweight women. *BMC Pregnancy and Childbirth.* 2010. 10 |
| **C. McParlin, S. C. Robson, P. W. Tennant, et al.**. Objectively measured physical activity during pregnancy: a study in obese and overweight women. 2010. 10:76 |
| **C. Nav**. Analizando la relación entre el aumento del peso fetal y la realización de ejercicio físico. / exploring the relationship between the fetusweight gain and the practice of physical activity. *Journal of Sport & Health Research.* 2013. 5:319-322 |
| **C. P. Ribeiro and H. Milanez.**. Knowledge, attitude and practice of women in Campinas, Sao Paulo, Brazil with respect to physical exercise in pregnancy: a descriptive study. 2011. 8:31 |
| **C. P. Ribeiro and H. Milanez.**. PMC3220627; Knowledge, attitude and practice of women in Campinas, Sao Paulo, Brazil with respect to physical exercise in pregnancy: a descriptive study. *Reproductive Health.* 2011. 8:31 |
| **C. Pavlou, T. Chard, J. Landon and A. T. Letchworth.**. Circulating levels of human placental lactogen in late pregnancy: the effect of glucose loading, smoking and exercise. 1973. 3:45-49 |
| **C. R. Beckmann and C. A. Beckmann.**. Effect of a structured antepartum exercise program on pregnancy and labor outcome in primiparas. *J.Reprod.Med..* 1990. 35:704-709 |
| **C. R. Holroyd, N. C. Harvey, S. R. Crozier, et al.**. EMS53569 PMC3800076; Placental size at 19 weeks predicts offspring bone mass at birth: findings from the Southampton Women's Survey. *Placenta.* 2012. 33:623-629 |
| **C. Ruissen, W. Jager, M. von Drongelen and H. Hoogland.**. The influence of maternal exercise on the pulsatility index of the umbilical artery blood velocity waveform. *European Journal of Obstetrics, Gynecology, & Reproductive Biology.* 1990. 37:1-6 |
| **C. S. Deshpande, A. Rakhshani, R. Nagarathna, et al.**. Yoga for high-risk pregnancy: a randomized controlled trial.[Erratum appears in Ann Med Health Sci Res. 2014 Nov;4(6):978 Note: Rakshani, A [corrected to Rakhshani, A]]. 2013. 3:341-344 |
| **C. S. Harrod, L. Chasan-Taber, R. M. Reynolds, et al.**. NIHMS600800 Available on 08/01/15] PMC4111108 Available on 08/01/15]; Physical activity in pregnancy and neonatal body composition: the Healthy Start study. *Obstetrics & Gynecology.* 2014. 124:257-264 |
| **C. S. Harrod, L. Chasan-Taber, R. M. Reynolds, et al.**. Physical Activity during Pregnancy and Neonatal Fat Mass: The Healthy Start Study. *Diabetes.* 2014. 63:A42 |
| **C. S. Rabkin, H. R. Anderson, J. M. Bland, O. G. Brooke, G. Chamberlain and J. L. Peacock.**. Maternal activity and birth weight: a prospective, population-based study. *Am.J.Epidemiol..* 1990. 131:522-531 |
| **C. S. Rabkin, H. R. Anderson, J. M. Bland, O. G. Brooke, G. Chamberlain and J. L. Peacock.**. Maternal activity and birth weight: a prospective, population-based study. 1990. 131:522-531 |
| **C. Savi, G. Milic-Emili and E. De Minicis.**. [The physiology of muscullar exercise in women at the termination of pregnancy]. 1959. 58:403-412 |
| **C. Schou Andersen, M. Juhl, M. Gamborg, T. I. Sorensen and E. A. Nohr.**. PMC3324144; Maternal Recreational Exercise during Pregnancy in relation to Children's BMI at 7 Years of Age. *International Journal of Pediatrics.* 2012. 2012:920583 |
| **C. Schou Andersen, M. Juhl, M. Gamborg, T. I. Sorensen and E. A. Nohr.**. Maternal Recreational Exercise during Pregnancy in relation to Children's BMI at 7 Years of Age. 2012. 2012:920583 |
| **C. Silveira, B. G. Pereira, J. G. Cecatti, S. R. Cavalcante and R. I. Pereira.**. PMC2936287; Fetal cardiotocography before and after water aerobics during pregnancy. *Reproductive Health.* 2010. 7:23 |
| **C. Taniguchi and C. Sato.**. Home-based walking during pregnancy affects mood and birth outcomes among sedentary women: A randomized controlled trial. *Int.J.Nurs.Pract..* 2016. 7:7 |
| **C. Taves, J. Charteris and J. C. Wall.**. The kinematics of treadmill walking during pregnancy. *Physiotherapy Canada.* 1982. 34:321-324 |
| **C. Tragea, G. P. Chrousos, E. C. Alexopoulos and C. Darviri.**. A randomized controlled trial of the effects of a stress management programme during pregnancy. 2014. 22:203-211 |
| **C. W. Burnett.**. The value of antenatal exercises. 1956. 63:40-57 |
| **C. W. Ko, P. G. Napolitano, S. P. Lee, S. D. Schulte, M. A. Ciol and S. A. Beresford.**. Physical activity, maternal metabolic measures, and the incidence of gallbladder sludge or stones during pregnancy: a randomized trial. *Am.J.Perinatol..* 2014. 31:39-48 |
| **C. W. Waage, I. Mdala, A. K. Jenum, T. M. Michelsen, K. I. Birkeland and L. Sletner.**. Ethnic differences in blood pressure from early pregnancy to postpartum: a Norwegian cohort study. *J.Hypertens..* 2016. 34:1151-1159 |
| **C. Wang, W. Zhu, Y. Wei, H. Feng, R. Su and H. Yang.**. PMC4603976; Exercise intervention during pregnancy can be used to manage weight gain and improve pregnancy outcomes in women with gestational diabetes mellitus. *BMC Pregnancy & Childbirth.* 2015. 15:255 |
| **C. Ward-Ritacco, M. S. Poudevigne and P. J. O'Connor.**. Muscle strengthening exercises during pregnancy are associated with increased energy and reduced fatigue. *Journal of Psychosomatic Obstetrics & Gynecology.* 2016. 37:68-72 |
| **C. Wharton and M. J. Benton.**. DataBase: research and evaluation results. Resistance exercise decreases the need for insulin in overweight women with gestational diabetes mellitus. *American Journal of Health Promotion.* 2006. 20:441-442 2p |
| **C. Woldringh, M. van den Wijngaart, P. Albers-Heitner, Lycklama a Nijeholt, A. A. and T. Lagro-Janssen.**. Pelvic floor muscle training is not effective in women with UI in pregnancy: a randomised controlled trial. 2007. 18:383-390 |
| **C. Wuertz, P. Gilbert, W. Baier and C. Kunz.**. Cross-sectional study of factors that influence the 25-hydroxyvitamin D status in pregnant women and in cord blood in Germany. *Br.J.Nutr..* 2013. 110:1895-1902 |
| **C. Y. Yates, L. M. Boylan, R. D. Lewis and J. A. Driskell.**. Maternal aerobic exercise and vitamin B-6 status. 1988. 48:117-121 |
| **C. Zhang, C. G. Solomon, J. E. Manson and F. B. Hu.**. A prospective study of pregravid physical activity and sedentary behaviors in relation to the risk for gestational diabetes mellitus. *Arch.Intern.Med..* 2006. 166:543-548 |
| **C. Zhang, C. G. Solomon, J. E. Manson and F. B. Hu.**. A prospective study of pregravid physical activity and sedentary behaviors in relation to the risk for gestational diabetes mellitus. 2006. 166:543-548 |
| **Catherine Kim, Phyllis Brawarsky, Rebecca A. Jackson, Elena Fuentes-Afflick and Jennifer S. Haas.**. Changes in health status experienced by women with gestational diabetes and pregnancy-induced hypertensive disorders. 2005. 14:729-736 |
| **Ch Estel and W. Turk.**. The influence of a defined physical exercise during pregnancy on the functional values of the maternal cardiovascular system and on fetal heart rate. *Zentralbl.Gynakol..* 1987. 109:929-935 |
| **Cheryl Vamos, Sara Flory, Haichun Sun, et al.**. Do Physical Activity Patterns Across the Lifecourse Impact Birth Outcomes?. *Maternal & Child Health Journal.* 2015. 19:1775-1782 8p |
| **Christopher P. Connolly.**. Leisure-time physical activity perceptions, influences, and behavior during pregnancy. 2015. 75:No Pagination Specified |
| **Colleen Doyle, Elizabeth Werner, Tianshu Feng, et al.**. Pregnancy distress gets under fetal skin: Maternal ambulatory assessment & sex differences in prenatal development. *Dev.Psychobiol..* 2015. 57:607-625 |
| **Corinne Urech, Nadine S. Fink, Irene Hoesli, Frank H. Wilhelm, Johannes Bitzer and Judith Alder.**. Effects of relaxation on psychobiological wellbeing during pregnancy: A randomized controlled trial. 2010. 35:1348-1355 |
| **Cuilin Zhang, Deirdre K. Tobias, Jorge E. Chavarro, et al.**. Adherence to healthy lifestyle and risk of gestational diabetes mellitus: Prospective cohort study. *BMJ: British Medical Journal Vol 349 Sep 2014, ArtID g5450.* 2014. 349 |
| **Curt L. Lox and Darren C. Treasure.**. Changes in feeling states following aquatic exercise during pregnancy. 2000. 30:518-517 |
| **D. C. Hall and D. A. Kaufmann.**. Effects of aerobic and strength conditioning on pregnancy outcomes. *American Journal of Obstetrics & Gynecology.* 1987. 157:1199-1203 |
| **D. C. Pinzon, K. Zamora, J. H. Martinez, et al.**. Type of delivery and gestational age is not affected by pregnant Latin-American women engaging in vigorous exercise: a secondary analysis of data from a controlled randomized trial. *Revista de Salud Publica.* 2012. 14:731-743 |
| **D. Cannella, M. Lobel and A. Monheit.**. Knowing is believing: information and attitudes towards physical activity during pregnancy. 2010. 31:236-242 |
| **D. Da Costa, N. Rippen, M. Dritsa and A. Ring.**. Self-reported leisure-time physical activity during pregnancy and relationship to psychological well-being. *Journal of Psychosomatic Obstetrics and Gynecology.* 2003. 24:111-119 |
| **D. Da Costa, N. Rippen, M. Dritsa and A. Ring.**. Self-reported leisure-time physical activity during pregnancy and relationship to psychological well-being. 2003. 24:111-119 |
| **D. Duncombe, H. Skouteris, E. H. Wertheim, L. Kelly, V. Fraser and S. J. Paxton.**. Vigorous exercise and birth outcomes in a sample of recreational exercisers: a prospective study across pregnancy. *Aust.N.Z.J.Obstet.Gynaecol..* 2006. 46:288-292 |
| **D. E. Irwin, D. A. Savitz, K. A. St Andre and I. Hertz-Picciotto.**. Study of occupational risk factors for pregnancy-induced hypertension among active duty enlisted Navy personnel. 1994. 25:349-359 |
| **D. H. Moore, J. C. Jarrett 2 and P. J. Bendick.**. Exercise-induced changes in uterine artery blood flow, as measured by Doppler ultrasound, in pregnant subjects. *Am.J.Perinatol..* 1988. 5:94-97 |
| **D. Hruba, L. Kukla and M. Tyrlik.**. Occupational risks for human reproduction: ELSPAC Study. European Longitudinal Study of Pregnancy and Childhood. *Cent.Eur.J.Public Health.* 1999. 7:210-215 |
| **D. Hruba, L. Kukla and M. Tyrlik.**. Occupational risks for human reproduction: ELSPAC Study. European Longitudinal Study of Pregnancy and Childhood. 1999. 7:210-215 |
| **D. J. Taylor, C. H. Thompson, G. J. Kemp, et al.**. A relationship between impaired fetal growth and reduced muscle glycolysis revealed by 31P magnetic resonance spectroscopy. *Diabetologia.* 1995. 38:1205-1212 |
| **D. J. Tuffnell, P. C. Buchan, D. Albert and S. Tyndale-Biscoe.**. Fetal heart rate responses to maternal exercise, increased maternal temperature and maternal circadian variation. *Journal of Obstetrics and Gynaecology.* 1990. 10:387-391 |
| **D. Jensen and D. E. O'Donnell.**. The impact of human pregnancy on perceptual responses to chemoreflex vs. exercise stimulation of ventilation: a retrospective analysis. 2011. 175:55-61 |
| **D. Jensen, K. A. Webb and D. E. O'Donnell.**. The increased ventilatory response to exercise in pregnancy reflects alterations in the respiratory control systems ventilatory recruitment threshold for CO2. 2010. 171:75-82 |
| **D. Jensen, K. A. Webb, G. A. Davies and D. E. O'Donnell.**. Mechanical ventilatory constraints during incremental cycle exercise in human pregnancy: implications for respiratory sensation. 2008. 586:4735-4750 |
| **D. Jensen, K. A. Webb, G. A. Davies and D. E. O'Donnell.**. Mechanisms of activity-related breathlessness in healthy human pregnancy. 2009. 106:253-265 |
| **D. Jensen, K. A. Webb, L. A. Wolfe and D. E. O'Donnell.**. Effects of human pregnancy and advancing gestation on respiratory discomfort during exercise. *Respiratory Physiology and Neurobiology.* 2007. 156:85-93 |
| **D. Jensen, K. A. Webb, L. A. Wolfe and D. E. O'Donnell.**. Effects of human pregnancy and advancing gestation on respiratory discomfort during exercise. 2007. 156:85-93 |
| **D. Koniakgriffin.**. Aerobic exercise, psychological well-being, and physical discomforts during adolescent pregnancy. *Res.Nurs.Health.* 1994. 17:253-263 |
| **D. L. Barnes, L. S. Adair and B. M. Popkin.**. Source: PIP. 066229 Source: POP. 00203051; Women's physical activity and pregnancy outcome: a longitudinal analysis from the Philippines. *Int.J.Epidemiol..* 1991. 20:162-172 |
| **D. L. Barnes, L. S. Adair and B. M. Popkin.**. Women's physical activity and pregnancy outcome: a longitudinal analysis from the Philippines. 1991. 20:162-172 |
| **D. L. Barnes, L. S. Adair and B. M. Popkin.**. Women's physical activity and pregnancy outcome: A longitudinal analysis from the Philippines. *Int.J.Epidemiol..* 1991. 20:162-172 |
| **D. Mparmpakas, A. Goumenou, E. Zachariades, G. Pados, Y. Gidron and E. Karteris.**. Immune system function, stress, exercise and nutrition profile can affect pregnancy outcome: Lessons from a Mediterranean cohort. 2013. 5:411-418 |
| **D. P. Misra, D. M. Strobino, E. E. Stashinko, D. A. Nagey and J. Nanda.**. Effects of physical activity on preterm birth. *Am.J.Epidemiol..* 1998. 147:628-635 |
| **D. R. Di Fabio, C. K. Blomme, K. M. Smith, G. J. Welk and C. G. Campbell.**. Adherence to physical activity guidelines in mid-pregnancy does not reduce sedentary time: an observational study. 2015. 12:27 |
| **D. R. Hollingsworth and T. R. Moore.**. Postprandial walking exercise in pregnant insulin-dependent (type I) diabetic women: reduction of plasma lipid levels but absence of a significant effect on glycemic control. *American Journal of Obstetrics & Gynecology.* 1987. 157:1359-1363 |
| **D. S. Downs, G. C. LeMasurier and J. M. DiNallo.**. Baby Steps: Pedometer-Determined and Self-Reported Leisure-Time Exercise Behaviors of Pregnant Women. *Journal of Physical Activity & Health.* 2009. 6:63-72 |
| **D. S. Downs, G. C. LeMasurier and J. M. DiNallo.**. Baby steps: pedometer-determined and self-reported leisure-time exercise behaviors of pregnant women. 2009. 6:63-72 |
| **D. Simmons, J. Jelmsa, S. Galjaard, et al.**. Results from a european multicentre, randomised trial of physical activity and/or healthy eating to reduce the risk of gestational diabetes mellitus (GDM): The dali pilot study. *Diabetes.* 2015. 64:A38 |
| **D. Symons Downs and J. S. Ulbrecht.**. Understanding exercise beliefs and behaviors in women with gestational diabetes mellitus. 2006. 29:236-240 |
| **Danielle A. J. M. Schoenaker, Sabita S. Soedamah-Muthu, Leonie K. Callaway and Gita D. Mishra.**. Prepregnancy dietary patterns and risk of developing hypertensive disorders of pregnancy: results from the Australian Longitudinal Study on Women's Health. 2015. 102:94-101 8 |
| **de Smoler Eisenberg, J. Armass-Dominguez, C. Dominguez-Munguia and S. Karchmer.**. Maternal exercise and maternal and fetal heart rate]. *Arch.Invest.Med..* 1974. 5:595-602 |
| **de Viñaspre Hernández, Regina Ruiz, Encarnación Rubio Aranda and Concepción Tomás Aznar.**. Urinary incontinence and weight changes during pregnancy and post partum: A pending challenge. 2013. 29:e123-9 1 |
| **Debbie M. Smith, Christine Ward, Shareen Forbes, Rebecca M. Reynolds and Fiona C. Denison.**. Weight Management Guides for Pregnant Women with a Body Mass index (BMI) Greater than or Equal to 40kg/m[Superscript 2]: A Qualitative Exploration of Their Use in Maternity Care. 2013. 72:216-221 |
| **Deirdre Dlugonski and Robert W. Motl.**. Marital status and motherhood: Implications for physical activity. *Women Health.* 2013. 53:203-215 |
| **Denise Maher.**. Exercise and Weight Management for the Pregnant Amputee. 2006. 15:24-24 |
| **der Ploeg van, M. N. van Poppel, T. Chey, et al.**. The role of pre-pregnancy physical activity and sedentary behaviour in the development of gestational diabetes mellitus. *Journal of Science & Medicine in Sport.* 2011. 14:149-152 4p |
| **der Wijden van, de Waal Delemarre-van, W. van Mechelen and M. N. van Poppel.**. The relationship between moderate-to-vigorous intensity physical activity and insulin resistance, insulin-like growth factor (IGF-1)-system 1, leptin and weight change in healthy women during pregnancy and after delivery. *Clin.Endocrinol.(Oxf).* 2015. 82:68-75 |
| **Der Wijden Van, Van De Waal, W. Van Mechelen and Van Poppel M.N.M.**. The relationship between moderate-to-vigorous intensity physical activity and insulin resistance, insulin-like growth factor (IGF-1)-system 1, leptin and weight change in healthy women during pregnancy and after delivery. *Clin.Endocrinol.(Oxf).* 2015. 82:68-75 |
| **Dominguez De Costa, Eisenberg De Smoler, J. Armas Dominguez and S. Karchmer.**. Exercise tests, heart rate and changes in the mother's position. 1977. 42:11-19 |
| **E. A. Beyaz, E. Ozcan, A. Ketenci and M. M. Beyaz.**. The effectiveness of pregnancy rehabilitation: Effects on low back pain and calf cramps during pregnancy and pregnancy outcome. 2011. 7:67-74 |
| **E. A. Morris, C. A. McBride, G. J. Badger and I. M. Bernstein.**. Prepregnancy blood pressure and history of first trimester loss contribute to birth weight and placental weight. *Reproductive Sciences.* 2015. 22:185A-186A |
| **E. A. Steegers, G. Buunk, R. A. Binkhorst, H. W. Jongsma, P. F. Wijn and P. R. Hein.**. The influence of maternal exercise on the uteroplacental vascular bed resistance and the fetal heart rate during normal pregnancy. *European Journal of Obstetrics, Gynecology, & Reproductive Biology.* 1988. 27:21-26 |
| **E. Althuizen, van der Wijden, C. L., W. van Mechelen, J. C. Seidell and M. N. van Poppel.**. The effect of a counselling intervention on weight changes during and after pregnancy: a randomised trial. 2013. 120:92-99 |
| **E. Althuizen, van Poppel, M. N. M., J. C. Seidell and W. van Mechelen.**. Correlates of absolute and excessive weight gain during pregnancy. 2009. 18:1559-1566 8 |
| **E. E. Krans and J. C. Chang.**. Low-income African American women's beliefs regarding exercise during pregnancy. 2012. 16:1180-1187 |
| **E. F. Magann, S. F. Evans and J. P. Newnham.**. Employment, exertion, and pregnancy outcome: assessment by kilocalories expended each day. *American Journal of Obstetrics & Gynecology.* 1996. 175:182-187 |
| **E. F. Magann, S. F. Evans and J. P. Newnham.**. Employment, exertion, and pregnancy outcome: assessment by kilocalories expended each day. 1996. 175:182-187 |
| **E. Forsum, N. Kabir, A. Sadurskis and K. Westerterp.**. Total energy expenditure of healthy Swedish women during pregnancy and lactation. 1992. 56:334-342 |
| **E. Golomer, D. Ducher, G. S. Arfi and R. Sud.**. A study of pregnant women while walking and while carrying a weight. French]. *J.Gynecol.Obstet.Biol.Reprod..* 1991. 20:406-412 |
| **E. Golomer, J. S. Arfi, R. Sud, B. Kapitaniak and J. Tomikowski.**. Exercise and pregnancy. Study of the change in heart rate in pregnancy when performing standardized moderate exercise]. *J.Gynecol.Obstet.Biol.Reprod..* 1989. 18:295-302 |
| **E. Ha, S. I. Cho, H. Park, et al.**. CME article #2: Does standing at work during pregnancy result in reduced infant birth weight?. *Journal of Occupational and Environmental Medicine.* 2002. 44:815-821 |
| **E. Ha, S. I. Cho, H. Park, et al.**. Does standing at work during pregnancy result in reduced infant birth weight?. *Journal of Occupational & Environmental Medicine.* 2002. 44:815-821 |
| **E. Ha, S. I. Cho, H. Park, et al.**. Does standing at work during pregnancy result in reduced infant birth weight?. 2002. 44:815-821 |
| **E. Haelterman, S. Marcoux, A. Croteau and M. Dramaix.**. Population-based study on occupational risk factors for preeclampsia and gestational hypertension. *Scandinavian Journal of Work, Environment and Health.* 2007. 33:304-317 |
| **E. Heery, A. McConnon, C. C. Kelleher, P. G. Wall and F. M. McAuliffe.**. PMC3827496; Perspectives on weight gain and lifestyle practices during pregnancy among women with a history of macrosomia: a qualitative study in the Republic of Ireland. *BMC Pregnancy & Childbirth.* 2013. 13:202 |
| **E. I. Florack, A. E. Pellegrino, G. A. Zielhuis and R. Rolland.**. Influence of occupational physical activity on pregnancy duration and birthweight. *Scand.J.Work Environ.Health.* 1995. 21:199-207 |
| **E. I. Florack, A. E. Pellegrino, G. A. Zielhuis and R. Rolland.**. Influence of occupational physical activity on pregnancy duration and birthweight. 1995. 21:199-207 |
| **E. I. Florack, G. A. Zielhuis, J. E. Pellegrino and R. Rolland.**. Occupational physical activity and the occurrence of spontaneous abortion. 1993. 22:878-884 |
| **E. I. M. Florack, G. A. Zielhuis, J. E. M. C. Pellegrino and R. Rolland.**. Occupational physical activity and the occurrence of spontaneous abortion. *Int.J.Epidemiol..* 1993. 22:878-884 |
| **E. J. Crenier and Y. Lambert.**. [Influence of pre- and postnatal exercises on the abdominal wall]. 1975. 4:551-556 |
| **E. K. Rousham, P. E. Clarke and H. Gross.**. Significant changes in physical activity among pregnant women in the UK as assessed by accelerometry and self-reported activity. *Eur.J.Clin.Nutr..* 2006. 60:393-400 |
| **E. K. Rousham, P. E. Clarke and H. Gross.**. Significant changes in physical activity among pregnant women in the UK as assessed by accelerometry and self-reported activity. 2006. 60:393-400 |
| **E. Korpi-Hyovalti, S. Heinonen, U. Schwab, D. E. Laaksonen and L. Niskanen.**. Effect of intensive counselling on physical activity in pregnant women at high risk for gestational diabetes mellitus. A clinical study in primary care. *Primary care diabetes.* 2012. 6:261-268 |
| **E. L. LeMoyne, D. Curnier and D. Ellemberg.**. Pregnancy and cognition: deficits in inhibition are unrelated to changes in fitness. *Journal of clinical and experimental neuropsychology.* 2014. 36:178-185 |
| **E. L. LeMoyne, D. Curnier and D. Ellemberg.**. Pregnancy and cognition: deficits in inhibition are unrelated to changes in fitness. 2014. 36:178-185 |
| **E. L. Rauff and D. S. Downs.**. Mediating effects of body image satisfaction on exercise behavior, depressive symptoms, and gestational weight gain in pregnancy. 2011. 42:381-390 |
| **E. M. Alfadhli, E. N. Osman, T. H. Basri, et al.**. Gestational diabetes among Saudi women: prevalence, risk factors and pregnancy outcomes. *Annals of Saudi Medicine.* 2015. 35:222-230 |
| **E. M. Alfadhli, E. N. Osman, T. H. Basri, et al.**. Gestational diabetes among Saudi women: prevalence, risk factors and pregnancy outcomes. 2015. 35:222-230 |
| **E. M. Ekholm, S. J. Piha, R. U. Erkkola and K. J. Antila.**. Autonomic cardiovascular reflexes in pregnancy. A longitudinal study. *Clinical Autonomic Research.* 1994. 4:161-165 |
| **E. Mocevic, S. W. Svendsen, K. T. Joorgensen, P. Frost and J. P. Bonde.**. Occupational lifting, fetal death and preterm birth: Findings from the Danish National Birth Cohort using a job exposure matrix. *PLoS ONE.* 2014. 9 |
| **E. Mocevic, S. W. Svendsen, K. T. Joorgensen, P. Frost and J. P. Bonde.**. Occupational lifting, fetal death and preterm birth: Findings from the Danish National Birth Cohort using a job exposure matrix. 2014. 9 |
| **E. Nethery, M. Brauer and P. Janssen.**. Time-activity patterns of pregnant women and changes during the course of pregnancy. 2009. 19:317-324 |
| **E. O. Im, W. Chee, H. J. Lim, Y. Liu and H. K. Kim.**. Midlife women's attitudes toward physical activity. *JOGNN - Journal of Obstetric, Gynecologic, and Neonatal Nursing.* 2008. 37:203-213 |
| **E. Oken, Y. Ning, S. Rifas-Shiman, J. S. Radesky, J. Rich-Edwards and M. W. Gillman.**. NIHMS21783 PMC1894947; Associations of physical activity and inactivity before and during pregnancy with glucose tolerance. *Obstetrics & Gynecology.* 2006. 108:1200-1207 |
| **E. P. Baciuk, R. I. Pereira, J. G. Cecatti, A. F. Braga and S. R. Cavalcante.**. PMC2613131; Water aerobics in pregnancy: Cardiovascular response, labor and neonatal outcomes. *Reproductive Health.* 2008. 5:10 |
| **E. P. Durak, L. Jovanovic-Peterson and C. M. Peterson.**. Comparative evaluation of uterine response to exercise on five aerobic machines. 1990. 162:754-756 |
| **E. Petrella, M. Malavolti, V. Bertarini, et al.**. Gestational weight gain in overweight and obese women enrolled in a healthy lifestyle and eating habits program. *Journal of Maternal-Fetal & Neonatal Medicine.* 2014. 27:1348-1352 |
| **E. Petridou, H. Salvanos, A. Skalkidou, N. Dessypris, M. Moustaki and D. Trichopoulos.**. Are there common triggers of preterm deliveries?. 2001. 108:598-604 |
| **E. Rutkowska and C. Lepecka-Klusek.**. The role of physical activity in preparing women for pregnancy and delivery in Poland. 2002. 23:919-923 |
| **E. S. Ji and H. R. Han.**. The effects of Qi exercise on maternal/fetal interaction and maternal well-being during pregnancy. *JOGNN - Journal of Obstetric, Gynecologic, & Neonatal Nursing.* 2010. 39:310-318 |
| **E. S. Ji and H. R. Han.**. The effects of Qi exercise on maternal/fetal interaction and maternal well-being during pregnancy. 2010. 39:310-318 |
| **E. S. Lindholm, M. Norman, C. P. Kilander and D. Altman.**. Weight control program for obese pregnant women. *Acta Obstet.Gynecol.Scand..* 2010. 89:840-843 |
| **E. T. Reilly, R. M. Freeman, M. R. Waterfield, A. E. Waterfield, P. Steggles and F. Pedlar.**. Prevention of postpartum stress incontinence in primigravidae with increased bladder neck mobility: a randomised controlled trial of antenatal pelvic floor exercises. 2014. 121 Suppl 7:58-66 |
| **E. Thorell and P. Kristiansson.**. Pregnancy related back pain, is it related to aerobic fitness? A longitudinal cohort study. 2012. 12:30 |
| **E. Thorell, K. Svardsudd, K. Andersson and P. Kristiansson.**. Moderate impact of full-term pregnancy on estimated peak oxygen uptake, physical activity and perceived health. *Acta Obstet.Gynecol.Scand..* 2014. 89:1140-1148 |
| **E. Thorell, L. Goldsmith, G. Weiss and P. Kristiansson.**. Physical fitness, serum relaxin and duration of gestation. 2015. 15:168 |
| **E. Thorell, L. Goldsmith, G. Weiss and P. Kristiansson.**. PMC4536895; Physical fitness, serum relaxin and duration of gestation. *BMC Pregnancy & Childbirth.* 2015. 15:168 |
| **E. Tlapáková, K. Jelen and M. Minař**. The relationship between pelvis inclination, exercise and low back pain (LBP) during pregnancy. 2011. 41:15-21 |
| **E. V. Bennett, C. E. McEwen, L. H. Clarke, K. A. Tamminen and P. R. E. Crocker.**. 'It's all about modifying your expectations': Women's experiences with physical activity during pregnancy. 2013. 5:267-286 |
| **E. V. Espel, L. M. Glynn, C. A. Sandman and E. P. Davis.**. PMC4244187; Longer gestation among children born full term influences cognitive and motor development. *PLoS ONE Electronic Resource].* 2014. 9:e113758 |
| **E. V. Tyldum, P. R. Romundstad and S. A. Slordahl.**. Pre-pregnancy physical activity and preeclampsia risk: a prospective population-based cohort study. *Acta Obstet.Gynecol.Scand..* 2010. 89:315-320 |
| **E. V. Tyldum, P. R. Romundstad and S. A. Slordahl.**. Pre-pregnancy physical activity and preeclampsia risk: a prospective population-based cohort study. 2010. 89:315-320 |
| **E. W. Reid, J. A. McNeill, F. A. Alderdice, M. A. Tully and V. A. Holmes.**. Physical activity, sedentary behaviour and fetal macrosomia in uncomplicated pregnancies: a prospective cohort study. *Midwifery.* 2014. 30:1202-1209 |
| **E. Weallens, A. Clark, P. MacIntyre and M. Gaudoin.**. A survey of exercise patterns in primigravidae at a Scottish NHS trust: More consistent support and advice required for women and their families. *Health Educ.J..* 2003. 62:234-245 |
| **E. Weallens, A. Clark, P. MacIntyre and M. Gaudoin.**. A survey of exercise patterns in primigravidae at a Scottish NHS trust: More consistent support and advice required for women and their families. 2003. 62:234-245 |
| **E. Wergeland, K. Strand and P. E. Bordahl.**. Strenuous working conditions and birthweight, Norway 1989. *Acta Obstet.Gynecol.Scand..* 1998. 77:263-271 |
| **E. Wergeland, K. Strand and P. E. Bordahl.**. Strenuous working conditions and birthweight, Norway 1989. 1998. 77:263-271 |
| **E. Y. Wong, R. Ray, D. L. Gao, et al.**. Physical activity, physical exertion, and miscarriage risk in Women textile Workers in Shanghai, china. *Am.J.Ind.Med..* 2010. 53:497-505 |
| **E. Y. Wong, R. Ray, D. L. Gao, et al.**. Physical activity, physical exertion, and miscarriage risk in women textile workers in Shanghai, China. 2010. 53:497-505 |
| **E. Zaharieva.**. Olympic participation by women. Effects on pregnancy and childbirth. *JAMA.* 1972. 221:992-995 |
| **El Metwalli, A. G. A., A. M. Badawy, L. A. El Baghdadi and A. El Wehady.**. Occupational physical activity and pregnancy outcome. *European Journal of Obstetrics Gynecology and Reproductive Biology.* 2001. 100:41-45 |
| **Elaine S. Marshall, Bridget Melton, Helen Bland and Jacquelyn Nagle.**. Physical Activity and Muscular Strengthening in Pregnancy: A Rural Urban Comparison. 2013. 13:50-65 16 |
| **Eman Mohammed Alfadhli, Eman Naguib Osman, Taghreed Hamza Basri, et al.**. Gestational diabetes among Saudi women: prevalence, risk factors and pregnancy outcomes. *Annals of Saudi Medicine.* 2015. 35:222-230 |
| **Erica P. Gunderson, Charles P. Quesenberry Jr., Cora E. Lewis, et al.**. Development of Overweight Associated with Childbearing Depends on Smoking Habit: The Coronary Artery Risk Development in Young Adults (CARDIA) Study. 2004. 12:2041-2053 |
| **F. Aliaga-Martinez, E. Prats-Ribera, M. Alsina-Hlipolito and A. Allepuz-Palau.**. Impact on the function of the pelvic floor muscles of a specific training program included in the routine monitoring of pregnancy and postpartum non-randomized controlled trial. Spanish]. *Matronas Profesion.* 2013. 14:36-44 |
| **F. Aliaga-Martinez, E. Prats-Ribera, M. Alsina-Hlipolito and A. Allepuz-Palau.**. Impact on the function of the pelvic floor muscles of a specific training program included in the routine monitoring of pregnancy and postpartum non-randomized controlled trial. [Spanish]. 2013. 14:36-44 |
| **F. Doran and A. P. O'Brien.**. A brief report of attitudes towards physical activity during pregnancy. *Health Promotion Journal of Australia.* 2007. 18:155-158 |
| **F. Doran and K. Davis.**. Factors that influence physical activity for pregnant and postpartum women and implications for primary care. *Australian Journal of Primary Health.* 2011. 17:79-85 |
| **F. Doran.**. Gestational diabetes mellitus: Perspectives on lifestyle changes during pregnancy and post-partum, physical activity and the prevention of future type 2 diabetes. 2008. 14:85-92 |
| **F. Ebrahimi, Z. M. Shariff, S. Z. Tabatabaei, M. S. Fathollahi, C. Y. Mun and M. Nazari.**. Relationship between sociodemographics, dietary intake, and physical activity with gestational weight gain among pregnant women in Rafsanjan City, Iran. 2015. 33:168-176 |
| **F. K. Lotgering, A. van den Berg, P. C. Struijk and H. C. Wallenburg.**. Arterial pressure response to maximal isometric exercise in pregnant women. 1992. 166:538-542 |
| **F. K. Lotgering, M. B. van Doorn, P. C. Struijk, J. Pool and H. C. Wallenburg.**. Maximal aerobic exercise in pregnant women: heart rate, O2 consumption, CO2 production, and ventilation. 1991. 70:1016-1023 |
| **F. K. Lotgering, P. C. Struijk, M. B. van Doorn, W. E. Spinnewijn and H. C. Wallenburg.**. Anaerobic threshold and respiratory compensation in pregnant women. 1995. 78:1772-1777 |
| **F. K. Lotgering, W. E. Spinnewijn, P. C. Struijk, F. Boomsma and H. C. Wallenburg.**. Respiratory and metabolic responses to endurance cycle exercise in pregnant and postpartum women. 1998. 19:193-198 |
| **F. M. Doran and N. A. Buckley.**. Walking patterns in pregnancy. *Australian Journal of Primary Health.* 2013. 19:213-218 |
| **F. M. Kovacs, E. Garcia, A. Royuela, L. Gonzalez, V. Abraira and Spanish Back Pain Research, Network.**. Prevalence and factors associated with low back pain and pelvic girdle pain during pregnancy: a multicenter study conducted in the Spanish National Health Service. 2012. 37:1516-1533 |
| **F. Mohammadi, J. Malakooti, J. Babapoor and S. Mohammad-Alizadeh-Charandabi.**. The effect of a home-based exercise intervention on postnatal depression and fatigue: A randomized controlled trial. 2015. 21:478-485 |
| **F. Momeni Javid, M. Simbar, M. Dolatian and H. Alavi Majd.**. Comparison of lifestyles of women with gestational diabetes and healthy pregnant women. *Global Journal of Health Science.* 2015. 7:162-169 |
| **F. Nasiri-Amiri, A. Bakhtiari, M. Faramarzi, H. Adib Rad and H. Pasha.**. The Association Between Physical Activity During Pregnancy and Gestational Diabetes Mellitus: A Case-Control Study. *International Journal of Endocrinology and Metabolism.* 2016. 14:e37123 |
| **F. O. Omokhodion, M. O. Onadeko, O. A. Roberts, J. R. Beach, I. Burstyn and N. M. Cherry.**. Paid work, domestic work, and other determinants of pregnancy outcome in Ibadan, southwest Nigeria. *International Journal of Gynaecology & Obstetrics.* 2010. 111:165-170 |
| **F. O. Omokhodion, M. O. Onadeko, O. A. Roberts, J. R. Beach, I. Burstyn and N. M. Cherry.**. Paid work, domestic work, and other determinants of pregnancy outcome in Ibadan, southwest Nigeria. 2010. 111:165-170 |
| **F. P. McCarthy, A. S. Khashan, D. Murray, et al.**. Parental physical and lifestyle factors and their association with newborn body composition. *BJOG: An International Journal of Obstetrics and Gynaecology.* 2016. 123:1824-1829 |
| **F. Sehati Shafayi, M. Akef, H. Sadegi and A. Sallakh Niknazhad.**. PMC3825354; A Comparison of Physical Activity and Nutritional Practices in Hypertensive and Non- hypertensive Pregnant Women. *Journal of Cardiovascular & Thoracic Research.* 2012. 4:53-56 |
| **F. Shobeiri and K. Begum.**. Physical activity and pregnancy outcome among Indian women belonging to high socioeconomic families. *Journal of Postgraduate Medical Institute.* 2005. 19:125-129 |
| **F. Shobeiri and K. Begum.**. Physical activity and pregnancy outcome among Indian women belonging to high socioeconomic families. 2005. 19:125-129 |
| **Fahimeh Sehati Shafayi, Maryam Akef, Homayoon Sadegi and Akram sallakh Niknazhad.**. A Comparison of Physical Activity and Nutritional Practices in Hypertensive and Non- hypertensive Pregnant Women. 2012. 4:53-56 4 |
| **Fernandes da Mota, P. G., A. G. Pascoal, A. I. Carita and K. Bo.**. Prevalence and risk factors of diastasis recti abdominis from late pregnancy to 6 months postpartum, and relationship with lumbo-pelvic pain. 2015. 20:200-205 |
| **G. A. Dumas, J. G. Reid, L. A. Wolfe, M. P. Griffin and M. J. McGrath.**. Exercise, posture, and back pain during pregnancy. Part 1. Exercise and posture. 1995. 10:98-103 |
| **G. A. Dumas, J. G. Reid, L. A. Wolfe, M. P. Griffin and M. J. McGrath.**. Exercise, posture, and back pain during pregnancy. Part 2. Exercise and back pain. 1995. 10:104-109 |
| **G. A. Hackett, T. Cohen-Overbeek and S. Campbell.**. The effect of exercise on uteroplacental Doppler waveforms in normal and complicated pregnancies. *Obstetrics & Gynecology.* 1992. 79:919-923 |
| **G. Ahlborg Jr.**. Physical work load and pregnancy outcome. 1995. 37:941-944 |
| **G. C. Di Renzo, I. Giardina, A. Rosati, et al.**. Maternal risk factors for preterm birth: a country-based population analysis. *European Journal of Obstetrics, Gynecology, & Reproductive Biology.* 2011. 159:342-346 |
| **G. C. Di Renzo, I. Giardina, A. Rosati, et al.**. Maternal risk factors for preterm birth: a country-based population analysis. 2011. 159:342-346 |
| **G. Candido, T. Lo and P. A. Janssen.**. Risk factors for diastasis of the recti abdominis. 2005. #volume#:49-54 6 |
| **G. Cito, S. Luisi, A. Mezzesimi, C. Cavicchioli, G. Calonaci and F. Petraglia.**. Maternal position during non-stress test and fetal heart rate patterns. 2005. 84:335-338 |
| **G. Cuco, V. Arija, R. Iranzo, J. Vila, M. T. Prieto and J. Fernandez-Ballart.**. Association of maternal protein intake before conception and throughout pregnancy with birth weight. 2006. 85:413-421 |
| **G. Eriksen, M. Wohlert, V. Ersbak, L. Hvidman, M. Hedegaard and K. Skajaa.**. Placental abruption. A case-control investigation. 1991. 98:448-452 |
| **G. Jans, L. Ameye, C. Matthys, et al.**. Does lifestyle coaching affect diet and physical activity stage of change scores in obese pregnant women? Pilot observations from the European DALI project. *Obesity Facts.* 2014. 7:132 |
| **G. Laura, L. Gianfranco and G. Donatella.**. Pelvic floor muscle training during pregnancy to prevent urinary pelvic floor dysfunctions. *Neurourol.Urodyn..* 2010. 29:64-65 |
| **G. Lee, S. Challenger, M. McNabb and M. Sheridan.**. A randomised controlled trial on exercise in pregnancy. 1996. #volume# |
| **G. M. Dado, P. B. Dobrin and R. S. Mrkvicka.**. Venous flow through coiled and noncoiled umbilical cords. Effects of external compression, twisting and longitudinal stretching. *J.Reprod.Med..* 1997. 42:576-580 |
| **G. M. Egeland, K. Klungsoyr, N. Oyen, G. S. Tell, O. Naess and R. Skjaerven.**. Preconception cardiovascular risk factor differences between gestational hypertension and preeclampsia: Cohort Norway study. *Hypertension.* 2016. 67:1173-1180 |
| **G. N. Bedell and R. W. Adams.**. Pulmonary Diffusing Capacity during Rest and Exercise. A Study of Normal Persons and Persons with Atrial Septal Defect, Pregnancy, and Pulmonary Disease. 1962. 41:1908-1914 |
| **G. N. Brankston, B. F. Mitchell, E. A. Ryan and N. B. Okun.**. Resistance exercise decreases the need for insulin in overweight women with gestational diabetes mellitus. *American Journal of Obstetrics & Gynecology.* 2004. 190:188-193 |
| **G. N. Brankston, B. F. Mitchell, E. A. Ryan and N. B. Okun.**. Resistance exercise decreases the need for insulin in overweight women with gestational diabetes mellitus. 2004. 190:188-193 |
| **G. Nagel, M. Wabitsch, C. Galm, et al.**. Determinants of obesity in the Ulm Research on Metabolism, Exercise and Lifestyle in Children (URMEL-ICE). 2009. 168:1259-1267 |
| **G. Ramirez, R. M. Grimes, J. F. Annegers, B. R. Davis and C. H. Slater.**. Occupational physical-activity and other risk-factors for preterm birth among united-states-army primigravidas. *Am.J.Public Health.* 1990. 80:728-729 |
| **G. Ramirez, R. M. Grimes, J. F. Annegers, B. R. Davis and C. H. Slater.**. PMC1404715; Occupational physical activity and other risk factors for preterm birth among US Army primigravidas. *Am.J.Public Health.* 1990. 80:728-730 |
| **G. Ramirez, R. M. Grimes, J. F. Annegers, B. R. Davis and C. H. Slater.**. Occupational physical activity and other risk factors for preterm birth among US Army primigravidas. 1990. 80:728-730 |
| **G. Risvas, I. Papaioannou, D. B. Panagiotakos, P. Farajian, V. Bountziouka and A. Zampelas.**. Perinatal and family factors associated with preadolescence overweight/obesity in Greece: the GRECO study. 2012. 2:145-153 |
| **G. S. Berkowitz, J. L. Kelsey, T. R. Holford and R. L. Berkowitz.**. Physical activity and the risk of spontaneous preterm delivery. *J.Reprod.Med..* 1983. 28:581-588 |
| **G. S. Berkowitz.**. An epidemiologic study of preterm delivery. 1981. 113:81-92 |
| **G. Torres-Luque, L. Torres-Luque, S. Garc**. Seguimiento de un programa de actividad f. 2012. 11:84-92 |
| **G. Varrassi, C. Bazzano and W. T. Edwards.**. Effects of physical activity on maternal plasma beta-endorphin levels and perception of labor pain. 1989. 160:707-712 |
| **G. Xu, Y. Wu, L. Yang, et al.**. Risk factors for early miscarriage among Chinese: a hospital-based case-control study. *Fertility & Sterility.* 2014. 101:1663-1670 |
| **G. Xu, Y. Wu, L. Yang, et al.**. Risk factors for early miscarriage among Chinese: a hospital-based case-control study. 2014. 101:1663-1670 |
| **G. Zhao, E. S. Ford, J. Tsai, et al.**. Trends in health-related behavioral risk factors among pregnant women in the United States: 2001-2009. 2012. 21:255-263 |
| **Gema Torres-Luque, Luc**. Empleo del poms durante un programa de actividad física en el medio acuático para mujeres embarazadas. / use of the poms during a physical activity program in aquatic environment for pregnant women. 2010. 10:37-45 |
| **Glasgow University of, Scottish Collaboration for Public Health, Research and Policy.**. Mellow Bumps RCT - Antenatal Intervention for Vulnerable Women. 2013. #volume# |
| **Guglielmina Fantuzzi, Elena Righi and Gabriella Aggazzotti.**. A Case-Control Study on Leisure Time Physical Activity (LTPA) during the Last Three Months of Pregnancy and Foetal Outcomes in Italy. *Health (1949-4998).* 2016. 8:133-143 11p |
| **H. A. Hausenblas, B. W. Brewer, J. L. Van Raalte, et al.**. Development and evaluation of a multimedia CD-ROM for exercise during pregnancy and postpartum. 2008. 70:215-219 |
| **H. Baumann, A. Huch and R. Huch.**. Doppler sonographic evaluation of exercise-induced blood flow velocity and waveform changes in fetal, uteroplacental and large maternal vessels in pregnant women. *J.Perinat.Med..* 1989. 17:279-287 |
| **H. C. Ostgaard, G. Zetherstrom, E. Roos-Hansson and B. Svanberg.**. Reduction of back and posterior pelvic pain in pregnancy. 1994. 19:894-900 |
| **H. Cramer, J. Frawley, A. Steel, et al.**. Characteristics of women who practice yoga in different locations during pregnancy. 2015. 5:e008641 |
| **H. D. Junge.**. Behavioral states and state related heart rate and motor activity patterns in the newborn infant and the fetus antepartum -- a comparative study. I. Technique, illustration of recordings, and general results. 1979. 7:85-107 |
| **H. D. Junge.**. Behavioral states and state-related heart rate and motor activity patterns in the newborn infant and the fetus ante partum. A comparative study. III. Analysis of sleep state-related motor activity patterns. 1980. 10:239-246 |
| **H. Dahlstrom and K. Ihrman.**. A clinical and physiological study of pregnancy in a material from northern Sweden. V. The results of work tests during and after pregnancy. 1960. 65:305-314 |
| **H. E. Harris, G. T. Ellison and S. Clement.**. Do the psychosocial and behavioral changes that accompany motherhood influence the impact of pregnancy on long-term weight gain?. 1999. 20:65-79 |
| **H. Elden, H. Hagberg, M. F. Olsen, L. Ladfors and H. C. Ostgaard.**. Regression of pelvic girdle pain after delivery: follow-up of a randomised single blind controlled trial with different treatment modalities. 2008. 87:201-208 |
| **H. Elden, L. Ladfors, M. F. Olsen, H. C. Ostgaard and H. Hagberg.**. Effects of acupuncture and stabilising exercises as adjunct to standard treatment in pregnant women with pelvic girdle pain: randomised single blind controlled trial. 2005. 330:761 |
| **H. G. Knuttgen and K. Emerson Jr.**. Physiological response to pregnancy at rest and during exercise. *J.Appl.Physiol..* 1974. 36:549-553 |
| **H. G. Knuttgen and K. Emerson Jr.**. Physiological response to pregnancy at rest and during exercise. 1974. 36:549-553 |
| **H. H. Kim, A. Nava-Ocampo, S. K. Kim, et al.**. Is prenatal childbirth preparation effective in decreasing adverse maternal and neonatal response to labor? A nested case-control study. *Acta Bio-Medica de l Ateneo Parmense.* 2008. 79:18-22 |
| **H. Hausenblas, D. S. Downs, P. Giacobbi, D. Tuccitto and B. Cook.**. A multilevel examination of exercise intention and behavior during pregnancy. 2008. 66:2555-2561 |
| **H. Hausenblas, P. Giacobbi, B. Cook, R. Rhodes and A. Cruz.**. Prospective examination of pregnant and nonpregnant women's physical activity beliefs and behaviours. *Journal of Reproductive and Infant Psychology.* 2011. 29:308-319 |
| **H. Jiang, X. Qian, M. Li, et al.**. Can physical activity reduce excessive gestational weight gain? Findings from a Chinese urban pregnant women cohort study. *International Journal of Behavioral Nutrition and Physical Activity.* 2012. 9 |
| **H. K. Hegaard, B. Ottesen, M. Hedegaard, et al.**. The association between leisure time physical activity in the year before pregnancy and pre-eclampsia. *Journal of Obstetrics & Gynaecology.* 2010. 30:21-24 |
| **H. K. Hegaard, B. Ottesen, M. Hedegaard, et al.**. The association between leisure time physical activity in the year before pregnancy and pre-eclampsia. 2010. 30:21-24 |
| **H. K. Hegaard, K. Petersson, M. Hedegaard, et al.**. Sports and leisure-time physical activity in pregnancy and birth weight: a population-based study. *Scand.J.Med.Sci.Sports.* 2010. 20:e96-102 |
| **H. K. Hegaard, K. Petersson, M. Hedegaard, et al.**. Sports and leisure-time physical activity in pregnancy and birth weight: a population-based study. 2010. 20:e96-102 |
| **H. K. Hegaard, M. Hedegaard, P. Damm, B. Ottesen, K. Petersson and T. B. Henriksen.**. Leisure time physical activity is associated with a reduced risk of preterm delivery. *American Journal of Obstetrics & Gynecology.* 2008. 198:180.e1-180.e5 |
| **H. K. Hegaard, P. Damm, M. Hedegaard, et al.**. Sports and leisure time physical activity during pregnancy in nulliparous women. *Maternal & Child Health Journal.* 2011. 15:806-813 |
| **H. K. Hegaard, P. Damm, M. Hedegaard, et al.**. Sports and leisure time physical activity during pregnancy in nulliparous women. 2011. 15:806-813 |
| **H. Kahyaoglu Sut and P. Balkanli Kaplan.**. Effect of pelvic floor muscle exercise on pelvic floor muscle activity and voiding functions during pregnancy and the postpartum period. 2015. #volume# |
| **H. Kahyaoglu Sut and P. Balkanli Kaplan.**. Effect of pelvic floor muscle exercise on pelvic floor muscle activity and voiding functions during pregnancy and the postpartum period. *Neurourology & Urodynamics.* 2016. 35:417-422 |
| **H. Kahyaoglu Sut and P. Balkanli Kaplan.**. Effect of pelvic floor muscle exercise on pelvic floor muscle activity and voiding functions during pregnancy and the postpartum period. *Neurourol.Urodyn..* 2016. 35:417-422 |
| **H. Kirkegaard, H. Stovring, K. M. Rasmussen, B. Abrams, T. I. Sorensen and E. A. Nohr.**. Maternal weight change from prepregnancy to 7 years postpartum--the influence of behavioral factors. 2015. 23:870-878 |
| **H. Klomp, R. F. Dyck and S. Sheppard.**. Description and evaluation of a prenatal exercise program for urban aboriginal women. *Canadian Journal of Diabetes.* 2003. 27:231-238 |
| **H. Klomp, R. F. Dyck and S. Sheppard.**. Description and evaluation of a prenatal exercise program for urban aboriginal women. 2003. 27:231-238 |
| **H. Kobe, A. Nakai, T. Koshino and T. Araki.**. Effect of regular maternal exercise on lipid peroxidation levels and antioxidant enzymatic activities before and after delivery. 2002. 69:542-548 |
| **H. M. Whitford, B. Alder and M. Jones.**. A cross-sectional study of knowledge and practice of pelvic floor exercises during pregnancy and associated symptoms of stress urinary incontinence in North-East Scotland. 2007. 23:204-217 |
| **H. Medek, T. Halldorsson, I. Gunnarsdottir and R. T. Geirsson.**. Physical activity of relatively high intensity in mid-pregnancy predicts lower glucose tolerance levels. *Acta Obstet.Gynecol.Scand..* 2016. 26:26 |
| **H. Medek, T. Halldorsson, I. Gunnarsdottir and R. T. Geirsson.**. Physical activity of relatively high intensity in mid-pregnancy predicts lower glucose tolerance levels. *Acta Obstet.Gynecol.Scand..* 2016. 26:26 |
| **H. Medek, T. Halldorsson, I. Gunnarsdottir and R. T. Geirsson.**. Physical activity of relatively high intensity in mid-pregnancy predicts lower glucose tolerance levels. *Acta Obstet.Gynecol.Scand..* 2016. 95:1055-1062 |
| **H. Mendieta Zeron, A. Garduno Alanis, P. Montserrat Nava Diaz, J. Guadalupe Santillan Benitez, De La Rosa and G. Conzuelo Rodriguez.**. Low activity in pregnancy does not modify neither adiponectin nor leptin serum levels. 2013. 172:773-779 |
| **H. N. Soultanakis, R. Artal and R. A. Wiswell.**. Prolonged exercise in pregnancy: glucose homeostasis, ventilatory and cardiovascular responses. *Semin.Perinatol..* 1996. 20:315-327 |
| **H. N. Soultanakis, R. Artal and R. A. Wiswell.**. Prolonged exercise in pregnancy: glucose homeostasis, ventilatory and cardiovascular responses. 1996. 20:315-327 |
| **H. N. Winn, O. Hess, I. Goldstein, F. Wackers and J. C. Hobbins.**. Fetal responses to maternal exercise: effect on fetal breathing and body movement. *Am.J.Perinatol..* 1994. 11:263-266 |
| **H. Prapavessis, S. De Jesus, T. Harper, et al.**. The effects of acute exercise on tobacco cravings and withdrawal symptoms in temporary abstinent pregnant smokers. 2014. 39:703-708 |
| **H. R. Murphy, K. Kumareswaran, J. M. Allen, et al.**. Closed loop insulin delivery protects against nocturnal hypoglycaemia after moderate physical activity in pregnant women with Type 1 diabetes. *Diabetic Med..* 2011. 28:18 |
| **H. Taskinen, P. Kyyronen and K. Hemminki.**. Effects of ultrasound, shortwaves, and physical exertion on pregnancy outcome in physiotherapists. 1990. 44:196-201 |
| **H. Taskinen, P. Kyyronen and K. Hemminki.**. PMC1060641; Effects of ultrasound, shortwaves, and physical exertion on pregnancy outcome in physiotherapists. *Journal of Epidemiology & Community Health.* 1990. 44:196-201 |
| **H. Volejnikova, K. Janku, M. Cernoch and J. Buzkova.**. The influence of exercise on the course of confinement in pregnant woman with cardiopathies. Czech]. *Rehabilitacia.* 1984. 17:37-40 |
| **H. Volejnikova, K. Janku, M. Cernoch and J. Buzkova.**. The influence of exercise on the course of confinement in pregnant woman with cardiopathies. *Rehabilitacia.* 1984. 17:37-40 |
| **H. Y. Yong, Z. Mohd Shariff, S. J. Koo and N. S. Binti Sa'ari.**. Pre-pregnancy body mass index, height and physical activity are associated with rate of gestational weight gain among Malaysian mothers. *Journal of Obstetrics & Gynaecology Research.* 2016. 26:26 |
| **Hanan E-Mekawy, Adly Ali Sabbour and Mohamed Mostafa Radwan.**. Effect of Antenatal Exercises on Umbilical Blood Flow and Neonate Wellbeing in Diabetic Pregnant Women. *Indian Journal of Physiotherapy & Occupational Therapy.* 2012. 6:121-125 5p |
| **Hao-Yuan Chang, Yeur-Hur Lai, Mark P. Jensen, et al.**. Factors associated with low back pain changes during the third trimester of pregnancy. 2014. 70:1054-1064 11 |
| **Heather A. Hausenblas and Danielle Symons Downs.**. Prospective Examination of Leisure-Time Exercise Behavior During Pregnancy. 2005. 17:240-246 |
| **Heather Jeffcoat.**. Perinatal Wellness. Top 5 Pregnancy Exercises for Low Back Pain. 2011. 26:9-10 2 |
| **Helena Andrade Figueira, de Souza Vale, Rodrigo Gomes, Wilma Ferreira Guedes Rodrigues, Alan Andrade Figueira, Joana Andrade Figueira and Estélio Henrique Martin Dantas.**. Pregnancy-Related Low Back Pain Relief after Maximum Static Flexibility Program. 2014. 6:2966-2972 7 |
| **Hora Soltani, Alexandra M. S. Duxbury, Madelynne A. Arden, Andy Dearden, Penny J. Furness and Carolyn Garland.**. Maternal Obesity Management Using Mobile Technology: A Feasibility Study to Evaluate a Text Messaging Based Complex Intervention during Pregnancy. 2015. 2015:1-10 10 |
| **I. A. Santos, R. Stein, S. C. Fuchs, et al.**. Aerobic exercise and submaximal functional capacity in overweight pregnant women: a randomized trial. *Obstetrics & Gynecology.* 2005. 106:243-249 |
| **I. A. Santos, R. Stein, S. C. Fuchs, et al.**. Aerobic exercise and submaximal functional capacity in overweight pregnant women: a randomized trial. 2005. 106:243-249 |
| **I. Danielsen, C. Granstrom, D. Rytter, et al.**. Does physical activity during pregnancy adversely influence markers of the metabolic syndrome in adult offspring? A prospective study over two decades. *Journal of Epidemiology & Community Health.* 2013. 67:648-654 |
| **I. Esteban-Cornejo, D. Martinez-Gomez, C. Tejero-Gonzalez, et al.**. Maternal physical activity before and during the prenatal period and the offspring's academic performance in youth. The UP&DOWN study. *Journal of Maternal-Fetal & Neonatal Medicine.* 2016. 29:1414-1420 |
| **I. Finkelstein, A. C. Kanitz, R. Bgeginski, et al.**. Comparison of the rating of perceived exertion and oxygen uptake during exercise between pregnant and non-pregnant women and between water and land-based exercises. *Revista Brasileira de Medicina do Esporte.* 2012. 18:13-16 |
| **I. Finkelstein, A. C. Kanitz, R. Bgeginski, et al.**. Comparison of the rating of perceived exertion and oxygen uptake during exercise between pregnant and non-pregnant women and between water and land-based exercises. 2012. 18:13-16 |
| **I. Finkelstein, P. A. de Figueiredo, C. L. Alberton, R. Bgeginski, R. Stein and L. F. Kruel.**. Cardiorespiratory responses during and after water exercise in pregnant and non-pregnant women. *Revista Brasileira de Ginecologia e Obstetricia.* 2011. 33:388-394 |
| **I. Finkelstein, Poli de Figueiredo, P. A., C. L. Alberton, R. Bgeginski, R. Stein and L. F. M. Kruel.**. Cardiorespiratory responses during and after water exercise in pregnant and non-pregnant women. 2011. 33:388-394 |
| **I. Finkelstein, R. Bgeginski, De Figueiredo, P. A. P., C. L. Alberton, R. Stein and L. F. M. Kruel.**. Cardiorespiratory responses of pregnant women during different types of exercise on land and in water. Portuguese]. *Rev.Bras.Med..* 2009. 66:174-177 |
| **I. Giroux, S. D. Inglis, S. Lander, S. Gerrie and M. F. Mottola.**. Dietary intake, weight gain, and birth outcomes of physically active pregnant women: a pilot study. *Applied Physiology, Nutrition, & Metabolism = Physiologie Appliquee, Nutrition et Metabolisme.* 2006. 31:483-489 |
| **I. K. Brenner, L. A. Wolfe, M. Monga and M. J. McGrath.**. Physical conditioning effects on fetal heart rate responses to graded maternal exercise. *Medicine & Science in Sports & Exercise.* 1999. 31:792-799 |
| **I. Kantola, T. Kaila and R. Erkkola.**. Acute exercise- and drug-induced potassium shifts during pregnancy. 1994. 208:88-90 |
| **I. Kawabata, A. Nakai, A. Sekiguchi, Y. Inoue and T. Takeshita.**. The effect of regular exercise training during pregnancy on postpartum brachial-ankle pulse wave velocity, a measure of arterial stiffness. 2012. 11:489-494 |
| **I. M. Claesson, A. Josefsson, M. Cedergren, et al.**. Consumer satisfaction with a weight-gain intervention programme for obese pregnant women. 2008. 24:163-167 |
| **I. M. Claesson, S. Klein, G. Sydsjo and A. Josefsson.**. Physical activity and psychological well-being in obese pregnant and postpartum women attending a weight-gain restriction programme. 2014. 30:11-16 |
| **I. M. Claesson, S. Klein, G. Sydsjö and A. Josefsson.**. Physical activity and psychological well-being in obese pregnant and postpartum women attending a weight-gain restriction programme. *Midwifery.* 2014. 30:11-16 |
| **I. Marc, J. Plaisance, C. Rheaume, et al.**. Correlates of maternal cardiorespiratory fitness in the early second trimester of pregnancy. *Canadian Journal of Diabetes.* 2011. 35 (2):181-182 |
| **I. N. McIntyre and N. A. Broadhurst.**. Effective treatment of low back pain in pregnancy. 1996. 25:S65-7 1 |
| **I. Nygaard, T. Girts, N. H. Fultz, K. Kinchen, G. Pohl and B. Sternfeld.**. Is urinary incontinence a barrier to exercise in women?. *Obstet.Gynecol..* 2005. 106:307-314 |
| **I. Raisanen, K. Salminen and T. Laatikainen.**. Response of plasma immunoreactive beta-endorphin and corticotropin to isometric exercise in uncomplicated pregnancy and in pregnancy-induced hypertension. 1990. 35:119-124 |
| **I. Rauramo and M. Forss.**. Effect of exercise on maternal hemodynamics and placental blood flow in healthy women. *Acta Obstet.Gynecol.Scand..* 1988. 67:21-25 |
| **I. Rauramo and M. Forss.**. Effect of exercise on placental blood flow in pregnancies complicated by hypertension, diabetes or intrahepatic cholestasis. *Acta Obstet.Gynecol.Scand..* 1988. 67:15-20 |
| **I. Rauramo, B. Andersson, T. Laatikainen and J. Pettersson.**. Stress hormones and placental steroids in physical exercise during pregnancy. *British Journal of Obstetrics & Gynaecology.* 1982. 89:921-925 |
| **I. Rauramo, K. Salminen and T. Laatikainen.**. Release of beta-endorphin in response to physical exercise in non-pregnant and pregnant women. 1986. 65:609-612 |
| **I. Rauramo, S. Ilmonen, L. Viinikka and O. Ylikorkala.**. Prostacyclin and thromboxane in pregnant and nonpregnant women in response to exercise. 1995. 85:1027-1030 |
| **I. Rauramo.**. Effect of short-term physical exercise on foetal heart rate and uterine activity in normal and abnormal pregnancies. *Ann.Chir.Gynaecol..* 1987. 76:274-279 |
| **I. Szeto, D. Ma, F. Liu, et al.**. The prevalence of excess weight gain, imbalanced dietary intake, and physical inactivity among pregnant women in urban areas of China. *Obesity Reviews.* 2014. 15:179 |
| **I. Tendais, B. Figueiredo, J. Mota and A. Conde.**. Physical activity, health-related quality of life and depression during pregnancy. 2011. 27:219-228 |
| **I. W. Aitken.**. Determinants of low birthweight among the Mendi of Sierra Leone: implications for medical and socio-economic strategies. 1990. 33:103-109 |
| **Iii J. F. Clapp and W. Kiess.**. Effects of pregnancy and exercise on concentrations of the metabolic markers tumor necrosis factor alpha and leptin. *Obstet.Gynecol..* 2000. 182:300-306 |
| **Iii J. F. Clapp, B. Lopez and R. Harcar-Sevcik.**. Neonatal behavioral profile of the offspring of women who continued to exercise regularly throughout pregnancy. *Obstet.Gynecol..* 1999. 180:91-94 |
| **Iii J. F. Clapp, S. Schmidt, A. Paranjape and B. Lopez.**. Maternal insulin-like growth factor-I levels (IGF-I) reflect placental mass and neonatal fat mass. *Obstet.Gynecol..* 2004. 190:730-736 |
| **Iii J. F. Clapp.**. Diet, exercise, and fete-placental growth. 1997. 260:101-108 |
| **Iii J. F. Clapp.**. Effect of dietary carbohydrate on the glucose and insulin response to mixed caloric intake and exercise in both nonpregnant and pregnant women. *Diabetes Care.* 1998. 21:B107-B112 |
| **J. A. Carvajal, A. M. Delpiano, M. A. Cuello and J. A. Poblete.**. Mechanical stretch increases brain natriuretic peptide production and secretion in the human fetal membranes. *Reproductive Sciences.* 2013. 20:597-604 |
| **J. A. Daniel, C. E. Dikki and W. Ibrahim.**. Aerobic dance exercise improves blood glucose level in pregnant women with gestational diabetes mellitus. *African Journal for Physical, Health Education, Recreation & Dance.* 2014. 20:273-281 |
| **J. A. Daniel, C. E. Dikki and W. Ibrahim.**. Aerobic dance exercise improves blood glucose level in pregnant women with gestational diabetes mellitus. 2014. 20:273-281 |
| **J. A. Grisso, D. M. Main, G. Chiu, E. S. Synder and J. H. Holmes.**. Effects of physical activity and life-style factors on uterine contraction frequency. *Am.J.Perinatol..* 1992. 9:489-492 |
| **J. A. Grisso, D. M. Main, G. Chiu, E. S. Synder and J. H. Holmes.**. Effects of physical activity and life-style factors on uterine contraction frequency. 1992. 9:489-492 |
| **J. A. Leiferman and K. R. Evenson.**. The effect of regular leisure physical activity on birth outcomes. *Maternal & Child Health Journal.* 2003. 7:59-64 |
| **J. Bustamante, R. Ramirez-Velez, A. C. D. Aguilar, A. Czerniczyniec and S. Lores-Arnaiz.**. Aerobic Exercise Training During Pregnancy Improves Mitochondrial Function In Human Placenta. *Med.Sci.Sports Exerc..* 2012. 44:746-746 |
| **J. C. Dempsey, C. L. Butler, T. K. Sorensen, et al.**. A case-control study of maternal recreational physical activity and risk of gestational diabetes mellitus. *Diabetes Research & Clinical Practice.* 2004. 66:203-215 |
| **J. C. Dempsey, T. K. Sorensen, I. M. Lee, et al.**. Recreational physical activity during and before pregnancy and risk of gestational diabetes mellitus. *Am.J.Epidemiol..* 2003. 157:S75-S75 |
| **J. C. Dempsey, T. K. Sorensen, M. A. Williams, et al.**. Prospective study of gestational diabetes mellitus risk in relation to maternal recreational physical activity before and during pregnancy. *Am.J.Epidemiol..* 2004. 159:663-670 |
| **J. C. Dempsey, T. K. Sorensen, M. A. Williams, et al.**. Prospective study of gestational diabetes mellitus risk in relation to maternal recreational physical activity before and during pregnancy. 2004. 159:663-670 |
| **J. C. Eisenman, M. A. Sarzynski, J. Tucker and K. A. Heelan.**. Maternal Prepregnancy Overweight and Offspring Fatness and Blood Pressure: Role of Physical Activity. *Pediatric Exercise Science.* 2010. 22:369-378 |
| **J. C. Hauth, L. C. Gilstrap 3 and K. Widmer.**. Fetal heart rate reactivity before and after maternal jogging during the third trimester. *American Journal of Obstetrics & Gynecology.* 1982. 142:545-547 |
| **J. C. Jarrett 2 and W. N. Spellacy.**. Jogging during pregnancy: an improved outcome?. *Obstetrics & Gynecology.* 1983. 61:705-709 |
| **J. C. Veille, A. E. Bacevice, B. Wilson, J. Janos and H. K. Hellerstein.**. Umbilical artery waveform during bicycle exercise in normal pregnancy. *Obstetrics & Gynecology.* 1989. 73:957-960 |
| **J. C. Veille, A. R. Hohimer, K. Burry and L. Speroff.**. The effect of exercise on uterine activity in the last eight weeks of pregnancy. *American Journal of Obstetrics & Gynecology.* 1985. 151:727-730 |
| **J. C. Veille, D. W. Kitzman and A. E. Bacevice.**. Effects of pregnancy on the electrocardiogram in healthy subjects during strenuous exercise. *Obstet.Gynecol..* 1996. 175:1360-1364 |
| **J. C. Veille, D. W. Kitzman and A. E. Bacevice.**. Effects of pregnancy on the electrocardiogram in healthy subjects during strenuous exercise. 1996. 175:1360-1364 |
| **J. C. Veille, D. W. Kitzman and A. E. Bacevice.**. Effects of pregnancy on the electrocardiogram in healthy subjects during strenuous exercise. *Obstet.Gynecol..* 1996. 175:1360-1364 |
| **J. C. Veille, D. W. Kitzman, P. D. Millsaps and P. D. Kilgo.**. Left ventricular diastolic filling response to stationary bicycle exercise during pregnancy and the postpartum period. 2001. 185:822-827 |
| **J. C. Veille, H. K. Hellerstein and A. E. Bacevice Jr.**. Maternal left ventricular performance during bicycle exercise. 1992. 69:1506-1508 |
| **J. C. Veille, H. K. Hellerstein, B. Cherry and A. E. Bacevice Jr.**. Effects of advancing pregnancy on left ventricular function during bicycle exercise. *Am.J.Cardiol..* 1994. 73:609-610 |
| **J. C. Veille, H. K. Hellerstein, B. Cherry and A. E. Bacevice Jr.**. Effects of advancing pregnancy on left ventricular function during bicycle exercise. 1994. 73:609-610 |
| **J. C. Young and J. L. Treadway.**. The effect of prior exercise on oral glucose tolerance in late gestational women. *Eur.J.Appl.Physiol.Occup.Physiol..* 1992. 64:430-433 |
| **J. C. Young and J. L. Treadway.**. The effect of prior exercise on oral glucose tolerance in late gestational women. 1992. 64:430-433 |
| **J. Choi, J. H. Lee, E. Vittinghoff and Y. Fukuoka.**. NIHMS743852 Available on 05/01/17] PMC4826820 Available on 05/01/17]; mHealth Physical Activity Intervention: A Randomized Pilot Study in Physically Inactive Pregnant Women. *Maternal & Child Health Journal.* 2016. 20:1091-1101 |
| **J. Delaney.**. Participation in sports and exercise during pregnancy. 1995. 10:8-9 2 |
| **J. Dotlic, M. Terzic, D. Babic, et al.**. Influence of lifestyle habits and behaviours on quality of life during pregnancy. 2012. 6:3987-3994 |
| **J. E. Martin, A. J. Hure, L. Macdonald-Wicks, R. Smith and C. E. Collins.**. Predictors of post-partum weight retention in a prospective longitudinal study. 2014. 10:496-509 |
| **J. Erneszt and L. Szanyi.**. Experimentation for determination of the loading capacity of cardiopathic pregnant women with analysis of the carotid pulse curve during pregnancy]. *Minerva Ginecol..* 1972. 24:1-5 |
| **J. F. Clapp 3 and Clapp,James F.,,3rd.**. Long-term outcome after exercising throughout pregnancy: fitness and cardiovascular risk. *American Journal of Obstetrics & Gynecology.* 2008. 199:489.e6 |
| **J. F. Clapp 3 and E. L. Capeless.**. Neonatal morphometrics after endurance exercise during pregnancy. *American Journal of Obstetrics & Gynecology.* 1990. 163:1805-1811 |
| **J. F. Clapp 3 and E. L. Capeless.**. The changing glycemic response to exercise during pregnancy. *American Journal of Obstetrics & Gynecology.* 1991. 165:1678-1683 |
| **J. F. Clapp 3 and K. H. Rizk.**. Effect of recreational exercise on midtrimester placental growth. *American Journal of Obstetrics & Gynecology.* 1992. 167:1518-1521 |
| **J. F. Clapp 3 and S. Dickstein.**. Endurance exercise and pregnancy outcome. *Medicine & Science in Sports & Exercise.* 1984. 16:556-562 |
| **J. F. Clapp 3, H. Kim, B. Burciu and B. Lopez.**. Beginning regular exercise in early pregnancy: effect on fetoplacental growth. *American Journal of Obstetrics & Gynecology.* 2000. 183:1484-1488 |
| **J. F. Clapp 3, H. Kim, B. Burciu, S. Schmidt, K. Petry and B. Lopez.**. Continuing regular exercise during pregnancy: effect of exercise volume on fetoplacental growth. *American Journal of Obstetrics & Gynecology.* 2002. 186:142-147 |
| **J. F. Clapp 3, K. D. Little and E. L. Capeless.**. Fetal heart rate response to sustained recreational exercise. *American Journal of Obstetrics & Gynecology.* 1993. 168:198-206 |
| **J. F. Clapp 3, K. D. Little and J. A. Widness.**. Effect of maternal exercise and fetoplacental growth rate on serum erythropoietin concentrations. *American Journal of Obstetrics & Gynecology.* 2003. 188:1021-1025 |
| **J. F. Clapp 3, K. D. Little, S. Appleby-Wineberg and J. A. Widness.**. The effect of regular maternal exercise on erythropoietin in cord blood and amniotic fluid. *American Journal of Obstetrics & Gynecology.* 1995. 172:1445-1451 |
| **J. F. Clapp 3, S. Simonian, B. Lopez, S. Appleby-Wineberg and R. Harcar-Sevcik.**. The one-year morphometric and neurodevelopmental outcome of the offspring of women who continued to exercise regularly throughout pregnancy. *American Journal of Obstetrics & Gynecology.* 1998. 178:594-599 |
| **J. F. Clapp 3, W. Stepanchak, J. Tomaselli, M. Kortan and S. Faneslow.**. Portal vein blood flow-effects of pregnancy, gravity, and exercise. *American Journal of Obstetrics & Gynecology.* 2000. 183:167-172 |
| **J. F. Clapp 3.**. Fetal heart rate response to running in midpregnancy and late pregnancy. *American Journal of Obstetrics & Gynecology.* 1985. 153:251-252 |
| **J. F. Clapp 3.**. Morphometric and neurodevelopmental outcome at age five years of the offspring of women who continued to exercise regularly throughout pregnancy. *J.Pediatr..* 1996. 129:856-863 |
| **J. F. Clapp 3.**. NIHMS91250 PMC2650435; Long-term outcome after exercising throughout pregnancy: fitness and cardiovascular risk. *American Journal of Obstetrics & Gynecology.* 2008. 199:489.e1-489.e6 |
| **J. F. Clapp 3.**. Oxygen consumption during treadmill exercise before, during, and after pregnancy. *American Journal of Obstetrics & Gynecology.* 1989. 161:1458-1464 |
| **J. F. Clapp 3.**. The changing thermal response to endurance exercise during pregnancy. *American Journal of Obstetrics & Gynecology.* 1991. 165:1684-1689 |
| **J. F. Clapp 3.**. The course of labor after endurance exercise during pregnancy. *American Journal of Obstetrics & Gynecology.* 1990. 163:1799-1805 |
| **J. F. Clapp 3.**. The effects of maternal exercise on early pregnancy outcome. *American Journal of Obstetrics & Gynecology.* 1989. 161:1453-1457 |
| **J. F. Clapp 3rd and E. Capeless.**. The VO2max of recreational athletes before and after pregnancy. 1991. 23:1128-1133 |
| **J. F. Clapp 3rd and E. L. Capeless.**. The changing glycemic response to exercise during pregnancy. 1991. 165:1678-1683 |
| **J. F. Clapp 3rd and K. H. Rizk.**. Effect of recreational exercise on midtrimester placental growth. 1992. 167:1518-1521 |
| **J. F. Clapp 3rd and W. Kiess.**. Effects of pregnancy and exercise on concentrations of the metabolic markers tumor necrosis factor alpha and leptin. 2000. 182:300-306 |
| **J. F. Clapp 3rd, K. D. Little and J. A. Widness.**. Effect of maternal exercise and fetoplacental growth rate on serum erythropoietin concentrations. 2003. 188:1021-1025 |
| **J. F. Clapp 3rd, M. Wesley and R. H. Sleamaker.**. Thermoregulatory and metabolic responses to jogging prior to and during pregnancy. 1987. 19:124-130 |
| **J. F. Clapp 3rd.**. Effect of dietary carbohydrate on the glucose and insulin response to mixed caloric intake and exercise in both nonpregnant and pregnant women. 1998. 21 Suppl 2:B107-12 |
| **J. F. Clapp 3rd.**. Long-term outcome after exercising throughout pregnancy: fitness and cardiovascular risk. 2008. 199:489.e1-489.e6 |
| **J. F. Clapp 3rd.**. Maternal heart rate in pregnancy. 1985. 152:659-660 |
| **J. F. Clapp 3rd.**. Morphometric and neurodevelopmental outcome at age five years of the offspring of women who continued to exercise regularly throughout pregnancy. 1996. 129:856-863 |
| **J. F. Clapp 3rd.**. Oxygen consumption during treadmill exercise before, during, and after pregnancy. 1989. 161:1458-1464 |
| **J. F. Clapp 3rd.**. The changing thermal response to endurance exercise during pregnancy. 1991. 165:1684-1689 |
| **J. F. Clapp 3rd.**. The effects of maternal exercise on early pregnancy outcome. 1989. 161:1453-1457 |
| **J. F. Clapp and K. D. Little.**. Effect of recreational exercise on pregnancy weight gain and subcutaneous fat deposition. *Med.Sci.Sports Exerc..* 1995. 27:170-177 |
| **J. F. Clapp Iii and B. Lopez.**. Size at birth, obesity and blood pressure at age five. *Metabolic Syndrome & Related Disorders.* 2007. 5:116-126 |
| **J. F. Clapp, M. Wesley and R. H. Sleamaker.**. Thermoregulatory and metabolic responses to jogging prior to and during pregnancy. / Reponses thermoregulatoires et metaboliques au jogging, avant et pendant la grossesse. *Medicine & Science in Sports & Exercise.* 1987. 19:124-130 |
| **J. G. Jelsma, K. M. van Leeuwen, N. Oostdam, et al.**. PMC4738738; Beliefs, Barriers, and Preferences of European Overweight Women to Adopt a Healthier Lifestyle in Pregnancy to Minimize Risk of Developing Gestational Diabetes Mellitus: An Explorative Study. *Journal of Pregnancy.* 2016. 2016:3435791 |
| **J. G. Kemp, F. A. Greer and L. A. Wolfe.**. Acid-base regulation after maximal exercise testing in late gestation. *J.Appl.Physiol..* 1997. 83:644-651 |
| **J. G. Kemp, F. A. Greer and L. A. Wolfe.**. Acid-base regulation after maximal exercise testing in late gestation. 1997. 83:644-651 |
| **J. G. Logan and S. Yeo.**. Effects of Stretching Exercise on Heart Rate Variability During Pregnancy. *J.Cardiovasc.Nurs..* 2016. 2:2 |
| **J. Gofin.**. The effect on birth weight of employment during pregnancy. *J.Biosoc.Sci..* 1979. 11:259-267 |
| **J. Goy, L. Dodds, M. W. Rosenberg and W. D. King.**. Health-risk behaviours: examining social disparities in the occurrence of stillbirth. 2008. 22:314-320 |
| **J. H. Kim, R. J. Roberge and J. B. Powell.**. Effect of external airflow resistive load on postural and exercise-associated cardiovascular and pulmonary responses in pregnancy: a case control study. 2015. 15:45 |
| **J. H. Kim, R. J. Roberge and J. B. Powell.**. PMC4357216; Effect of external airflow resistive load on postural and exercise-associated cardiovascular and pulmonary responses in pregnancy: a case control study. *BMC Pregnancy & Childbirth.* 2015. 15:45 |
| **J. H. Liu, E. J. Mayer-Davis, R. R. Pate, A. E. Gallagher and J. L. Bacon.**. Physical activity during pregnancy is associated with reduced fasting insulin--the Pilot Pregnancy and Active Living Study. 2010. 23:1249-1252 |
| **J. H. Liu, E. Mayer-Davis, R. R. Pate, A. E. Gallagher and J. L. Bacon.**. Physical activity during pregnancy is associated with reduced fasting insulin-the Pilot Pregnancy and Active Living Study. *Journal of Maternal-Fetal and Neonatal Medicine.* 2010. 23:1249-1252 |
| **J. H. Liu, S. N. Blair, Y. P. Teng, A. R. Ness, D. A. Lawlor and C. Riddoch.**. Physical activity during pregnancy in a prospective cohort of British women: results from the Avon longitudinal study of parents and children. *Eur.J.Epidemiol..* 2011. 26:237-247 |
| **J. Huberty, D. Dinkel, M. W. Beets and J. Coleman.**. Describing the use of the internet for health, physical activity, and nutrition information in pregnant women. 2013. 17:1363-1372 |
| **J. J. Newham, A. Wittkowski, J. Hurley, J. D. Aplin and M. Westwood.**. Effects of antenatal yoga on maternal anxiety and depression: a randomized controlled trial. *Depress.Anxiety.* 2014. 31:631-640 |
| **J. J. Newham, A. Wittkowski, J. Hurley, J. D. Aplin and M. Westwood.**. Effects of antenatal yoga on maternal anxiety and depression: a randomized controlled trial. 2014. 31:631-640 |
| **J. J. Newham, C. Allan, P. Leahy-Warren, D. Carrick-Sen and F. Alderdice.**. Intentions Toward Physical Activity and Resting Behavior in Pregnant Women: Using the Theory of Planned Behavior Framework in a Cross-Sectional Study. *Birth.* 2016. 43:49-57 |
| **J. J. Pomerance, L. Gluck and V. A. Lynch.**. Maternal exercise as a screening test for uteroplacental insufficiency. *Obstetrics & Gynecology.* 1974. 44:383-387 |
| **J. J. Pomerance, L. Gluck and V. A. Lynch.**. Physical fitness in pregnancy: its effect on pregnancy outcome. *American Journal of Obstetrics & Gynecology.* 1974. 119:867-876 |
| **J. Jurewicz, W. Hanke, T. Makowiec-Dabrowska and J. Kalinka.**. Heaviness of the work measured by energy expenditure during pregnancy and its effect on birth weight]. *Ginekol.Pol..* 2006. 77:537-542 |
| **J. Kluge, D. Hall, Q. Louw, G. Theron and D. Grove.**. Specific exercises to treat pregnancy-related low back pain in a South African population. 2011. 113:187-191 |
| **J. L. Ersek and L. R. Brunner Huber.**. Physical activity prior to and during pregnancy and risk of postpartum depressive symptoms. 2009. 38:556-566 |
| **J. L. Huberty, M. P. Buman, J. A. Leiferman, J. Bushar and M. A. Adams.**. Trajectories of objectively-measured physical activity and sedentary time over the course of pregnancy in women self-identified as inactive. *Preventive Medicine Reports.* 2016. 3:353-360 |
| **J. L. Huberty, M. P. Buman, J. A. Leiferman, J. Bushar and M. A. Adams.**. PMC4929212; Trajectories of objectively-measured physical activity and sedentary time over the course of pregnancy in women self-identified as inactive. *Preventive Medicine Reports.* 2016. 3:353-360 |
| **J. L. Kraschnewski, C. H. Chuang, D. S. Downs, et al.**. Association of prenatal physical activity and gestational weight gain: results from the first baby study. 2013. 23:e233-8 |
| **J. L. Kraschnewski, C. H. Chuang, D. S. Downs, et al.**. NIHMS494513 PMC3742311; Association of prenatal physical activity and gestational weight gain: results from the first baby study. *Womens Health Issues.* 2013. 23:e233-8 |
| **J. Langhoff-Roos, G. Lindmark, E. Kylberg and M. Gebre-Medhin.**. Energy intake and physical activity during pregnancy in relation to maternal fat accretion and infant birthweight. *British Journal of Obstetrics & Gynaecology.* 1987. 94:1178-1185 |
| **J. Langhoff-Roos, G. Lindmark, E. Kylberg and M. Gebre-Medhin.**. Energy intake and physical activity during pregnancy in relation to maternal fat accretion and infant birthweight. *Br.J.Obstet.Gynaecol..* 1987. 94:1178-1185 |
| **J. Leiferman, T. Swibas, K. Koiness, J. A. Marshall and A. L. Dunn.**. My baby, my move: examination of perceived barriers and motivating factors related to antenatal physical activity. 2011. 56:33-40 |
| **J. Leng, G. Liu, C. Zhang, et al.**. Physical activity, sedentary behaviors and risk of gestational diabetes mellitus: a population-based cross-sectional study in Tianjin, China. *European Journal of Endocrinology.* 2016. 174:763-773 |
| **J. Leng, G. Liu, C. Zhang, et al.**. Physical activity, sedentary behaviors and risk of gestational diabetes mellitus: A population-based cross-sectional study in Tianjin, China. *European Journal of Endocrinology.* 2016. 174:763-773 |
| **J. Liu, J. N. Laditka, E. J. Mayer-Davis and R. R. Pate.**. Does physical activity during pregnancy reduce the risk of gestational diabetes among previously inactive women?. 2008. 35:188-195 |
| **J. Liu, J. N. Laditka, E. Mayer-Davis and R. R. Pate.**. Does physical activity during pregnancy reduce the risk of gestational diabetes among previously inactive women?. *Birth.* 2008. 35:188-195 |
| **J. Liu, J. N. Laditka, E. Mayer-Davis and R. R. Pate.**. Physical activity during pregnancy may reduce risk of gestational diabetes among previously inactive women. *Diabetes.* 2006. 55:A418-A418 |
| **J. Liu, S. N. Blair, Y. Teng, A. R. Ness, D. A. Lawlor and C. Riddoch.**. Physical activity during pregnancy in a prospective cohort of British women: results from the Avon longitudinal study of parents and children. 2011. 26:237-247 |
| **J. Lutter.**. Fetal outcome of women who ran while pregnant: a preliminary report. *Melpomene Report.* 1984. 3:6-8 |
| **J. M. Catov, R. B. Ness, M. F. Wellons, D. R. Jacobs, J. M. Roberts and E. P. Gunderson.**. Prepregnancy lipids related to preterm birth risk: the coronary artery risk development in young adults study. 2010. 95:3711-3718 |
| **J. M. DiNallo, D. S. Downs and G. Le Masurier.**. Objectively assessing treadmill walking during the second and third pregnancy trimesters. *Journal of Physical Activity & Health.* 2012. 9:21-28 |
| **J. M. DiNallo, D. S. Downs and G. Le Masurier.**. Objectively assessing treadmill walking during the second and third pregnancy trimesters. 2012. 9:21-28 |
| **J. M. DiNallo, G. C. Le Masurier, N. I. Williams and D. S. Downs.**. Walking for health in pregnancy: assessment by indirect calorimetry and accelerometry. 2008. 79:28-35 |
| **J. M. Dodd, A. R. Deussen, I. Mohamad, et al.**. NIHMS777629 Available on 01/01/17] PMC4859433 Available on 01/01/17]; The effect of antenatal lifestyle advice for women who are overweight or obese on secondary measures of neonatal body composition: the LIMIT randomised trial. *BJOG: An International Journal of Obstetrics & Gynaecology.* 2016. 123:244-253 |
| **J. M. Dodd, C. Cramp, Z. Sui, et al.**. The effects of antenatal dietary and lifestyle advice for women who are overweight or obese on maternal diet and physical activity: the LIMIT randomised trial. 2014. 12:161 |
| **J. M. Dodd, R. M. Grivell and J. A. Owens.**. Antenatal Dietary and Lifestyle Interventions for Women Who are Overweight or Obese: Outcomes from the LIMIT Randomized Trial. 2014. 3:392-399 |
| **J. M. Kinder, T. T. Jiang, J. M. Ertelt, et al.**. NIHMS707202 Available on 07/30/16] PMC4522363 Available on 07/30/16]; Cross-Generational Reproductive Fitness Enforced by Microchimeric Maternal Cells. *Cell.* 2015. 162:505-515 |
| **J. M. Nicklas, L. J. Miller, C. A. Zera, R. B. Davis, S. E. Levkoff and E. W. Seely.**. Factors associated with depressive symptoms in the early postpartum period among women with recent gestational diabetes mellitus. 2013. 17:1665-1672 |
| **J. M. Pivarnik, A. D. Stein and J. M. Rivera.**. Effect of pregnancy on heart rate/oxygen consumption calibration curves. *Medicine & Science in Sports & Exercise.* 2002. 34:750-755 6p |
| **J. M. Pivarnik, A. D. Stein and J. M. Rivera.**. Effect of pregnancy on heart rate/oxygen consumption calibration curves. 2002. 34:750-755 |
| **J. M. Pivarnik, L. M. Mudd, E. E. White, R. A. Schlaff and K. L. Peyer.**. Physical activity during pregnancy and offspring characteristics at 8-10 years. *Journal of Sports Medicine & Physical Fitness.* 2014. 54:672-679 |
| **J. M. Pivarnik, M. B. Mauer, N. A. Ayres, B. Kirshon, G. A. Dildy and D. B. Cotton.**. Effects of chronic exercise on blood volume expansion and hematologic indices during pregnancy. *Obstetrics & Gynecology.* 1994. 83:265-269 |
| **J. M. Pivarnik, N. A. Ayres, M. B. Mauer, D. B. Cotton, B. Kirshon and G. A. Dildy.**. Effects of maternal aerobic fitness on cardiorespiratory responses to exercise. / Effets de la condition aerobie maternelle sur les reponses cardiorespiratoires a l ' exercice. *Medicine & Science in Sports & Exercise.* 1993. 25:993-998 |
| **J. M. Pivarnik, N. A. Ayres, M. B. Mauer, D. B. Cotton, B. Kirshon and G. A. Dildy.**. Effects of maternal aerobic fitness on cardiorespiratory responses to exercise. 1993. 25:993-998 |
| **J. M. Pivarnik, W. Lee and J. F. Miller.**. Physiological and perceptual responses to cycle and treadmill exercise during pregnancy. 1991. 23:470-475 |
| **J. M. Pivarnik, W. Lee, J. F. Miller and J. Werch.**. Alterations in plasma volume and protein during cycle exercise throughout pregnancy. 1990. 22:751-755 |
| **J. M. Pivarnik, W. Lee, S. L. Clark, D. B. Cotton, H. T. Spillman and J. F. Miller.**. Cardiac output responses of primigravid women during exercise determined by the direct Fick technique. *Obstetrics & Gynecology.* 1990. 75:954-959 |
| **J. M. Pivarnik, W. Lee, S. L. Clark, D. B. Cotton, H. T. Spillman and J. F. Miller.**. Cardiac output responses of primigravid women during exercise determined by the direct Fick technique. 1990. 75:954-959 |
| **J. M. Pivarnik, W. Lee, T. Spillman, S. L. Clark, D. B. Cotton and J. F. Miller.**. Maternal respiration and blood-gases during aerobic exercise performed at moderate altitude. *Med.Sci.Sports Exerc..* 1992. 24:868-872 |
| **J. M. Pivarnik, W. Lee, T. Spillman, S. L. Clark, D. B. Cotton and J. F. Miller.**. Maternal respiration and blood gases during aerobic exercise performed at moderate altitude. 1992. 24:868-872 |
| **J. M. Schlütter, I. Kirkegaard, A. S. Ferreira, et al.**. The Number of Endovascular Trophoblasts in Maternal Blood Increases Overnight and after Physical Activity: An Experimental Study. *Fetal.Diagn.Ther..* 2015. #volume# |
| **J. M. Schlutter, I. Kirkegaard, L. Hatt, B. Christensen, S. Kolvraa and N. Uldbjerg.**. The number of fetal cells in maternal blood increases overnight and after exercise. *Prenat.Diagn..* 2012. 32:23 |
| **J. M. Schlutter, L. Hatt, C. Bach, I. Kirkegaard, S. Kolvraa and N. Uldbjerg.**. The cell-free fetal DNA fraction in maternal blood decreases after physical activity. *Prenat.Diagn..* 2014. 34:341-344 |
| **J. M. Walsh, C. McGowan, J. Byrne and F. M. McAuliffe.**. Prevalence of physical activity among healthy pregnant women in Ireland. 2011. 114:154-155 |
| **J. M. Wright, C. S. Hoffman, M. J. Nieuwenhuijsen and D. A. Savitz.**. The Effect of Swimming During Pregnancy on Fetal Growth. *Water Quality Exposure and Health.* 2011. 3:217-223 |
| **J. Makela, H. Lagstrom, A. Kaljonen, O. Simell and H. Niinikoski.**. Hyperglycemia and lower diet quality in pregnant overweight women and increased infant size at birth and at 13 months of age--STEPS study. 2013. 89:439-444 |
| **J. Marcinkevage, A. Correa, U. Ramakrishnan, A. Sharma, K. M. V. Narayan and G. Umpierrez.**. Physical activity behaviors and blood glucose levels during first trimester of pregnancy in Urban black women. *Diabetes.* 2012. 61:A636-A637 |
| **J. Marcinkevage, A. Correa, U. Ramakrishnan, A. Sharma, K. M. Venkat Narayan and G. Umpierrez.**. Reducing sedentary behavior and increasing physical activity during pregnancy: A feasibility study. *Diabetes.* 2012. 61:A344 |
| **J. N. Olayiwola, O. C. Irizarry, K. O'Connell and S. Milan.**. Living Smart, Living Fit: a patient-centered program to improve perinatal outcomes in a community health center population. 2013. 4:31-35 |
| **J. N. Watts, Y. D. Miller and A. L. Marshall.**. Depressive symptoms during pregnancy: Exploring the role of sitting. 2013. 6:36-42 |
| **J. Newham, J. Hurley, A. Wittkowski, J. D. Aplin and M. Westwood.**. Initials findings of CALMA study (Can Antenatal Yoga Lower Maternal Anxiety). *Journal of Reproductive and Infant Psychology.* 2011. 29 (3):e29-e30 |
| **J. Newham, M. Westwood, A. Wittkowski and J. Aplin.**. Efficacy of yoga in reducing maternal anxiety in pregnancy. *Journal of Reproductive and Infant Psychology.* 2010. 28 (3):e13 |
| **J. Orskou, T. B. Henriksen, U. Kesmodel and N. J. Secher.**. Maternal characteristics and lifestyle factors and the risk of delivering high birth weight infants. *Obstetrics & Gynecology.* 2003. 102:115-120 |
| **J. Orskou, T. B. Henriksen, U. Kesmodel and N. J. Secher.**. Maternal characteristics and lifestyle factors and the risk of delivering high birth weight infants. 2003. 102:115-120 |
| **J. P. Manshande, R. Eeckels, V. Manshande-Desmet and R. Vlietinck.**. Rest versus heavy work during the last weeks of pregnancy: influence on fetal growth. *British Journal of Obstetrics & Gynaecology.* 1987. 94:1059-1067 |
| **J. P. Manshande, R. Eeckels, V. Manshande-Desmet and R. Vlietinck.**. Rest versus heavy work during the last weeks of pregnancy: influence on fetal growth. 1987. 94:1059-1067 |
| **J. P. Pirhonen, P. G. Lindqvist and K. Marsal.**. A longitudinal study of maternal oxygen saturation during short-term submaximal exercise. *Clinical Physiology & Functional Imaging.* 2003. 23:37-41 |
| **J. P. Pirhonen, P. G. Lindqvist and K. Marsal.**. A longitudinal study of maternal oxygen saturation during short-term submaximal exercise. 2003. 23:37-41 |
| **J. Parizkova and R. Petrasek.**. The impact of daily work load during pregnancy on lipid metabolism in the liver of the offspring. *Bibl.Nutr.Dieta.* 1979. #volume#:57-64 |
| **J. Pomeroy, F. Renstrom, A. M. Gradmark, et al.**. Maternal physical activity and insulin action in pregnancy and their relationships with infant body composition. 2013. 36:267-269 |
| **J. S. Arfi and G. Peres.**. Maternal and fetal heart rates during bicycle ergometer exercise]. *J.Gynecol.Obstet.Biol.Reprod..* 1986. 15:281-286 |
| **J. S. Haas, E. Fuentes-Afflick, A. L. Stewart, et al.**. Prepregnancy health status and the risk of preterm delivery. 2005. 159:58-63 |
| **J. S. Savage, D. S. Downs, Y. Dong and D. E. Rivera.**. PMC4056194; Control systems engineering for optimizing a prenatal weight gain intervention to regulate infant birth weight. *Am.J.Public Health.* 2014. 104:1247-1254 |
| **J. S. Tavares, A. S. O. Melo, M. M. R. Amorim, et al.**. Physical activity patterns in pregnant women attending the family health program of Campina Grande - PB. *Revista Brasileira de Epidemiologia.* 2009. 12:10-19 |
| **J. Smedley, J. M. Jancey, S. Dhaliwal, Y. Zhao, S. M. D. R. Monteiro and P. Howat.**. Women's reported health behaviours before and during pregnancy: A retrospective study. 2014. 73:28-40 |
| **J. T. Bambicini, V. C. M. Soares, M. R. D. Zanetti, M. R. Torloni, M. C. Ribeiro and R. Mattar.**. Effects of aerobic and resistance exercises on glycemic levels of patients with gestational diabetes: Pilot study. *International Journal of Gynecology and Obstetrics.* 2012. 119:S603 |
| **J. Tinloy, C. H. Chuang, J. Zhu, J. Pauli, J. L. Kraschnewski and K. H. Kjerulff.**. NIHMS541362 Available on 01/01/15] PMC3913372 Available on 01/01/15]; Exercise during pregnancy and risk of late preterm birth, cesarean delivery, and hospitalizations. *Womens Health Issues.* 2014. 24:e99-e104 |
| **J. Van Eyck, J. Wladimiroff, M. Noordam, H. Tonge and H. Prechtl.**. The blood flow velocity waveform in the fetal descending aorta: Its relationship to fetal behavioural states in normal pregnancy at 37-38 weeks. *Early Hum.Dev..* 1985. 12:137-143 |
| **J. W. Van Hook, P. Gill, T. R. Easterling, B. Schmucker, K. Carlson and T. J. Benedetti.**. The hemodynamic effects of isometric exercise during late normal pregnancy. 1993. 169:870-873 |
| **J. W. Vanhook, P. Gill, T. R. Easterling, B. Schmucker, K. Carlson and T. J. Benedetti.**. The hemodynamic-effects of isometric-exercise during late normal-pregnancy. 1993. 169:870-873 |
| **J. Zhang and D. A. Savitz.**. Exercise during pregnancy among US women. *Ann.Epidemiol..* 1996. 6:53-59 |
| **J. Zhang and D. A. Savitz.**. Exercise during pregnancy among US women. 1996. 6:53-59 |
| **James J. Newham, Carly Allan, Patricia Leahy-Warren, Debbie Carrick-Sen and Fiona Alderdice.**. Intentions toward physical activity and resting behavior in pregnant women: Using the theory of planned behavior framework in a cross-sectional study. *Birth: Issues in Perinatal Care.* 2016. 43:49-57 |
| **Jan Pryor.**. Physical and behavioural correlates of 12-month development in small-for-gestational age and appropriately grown infants. 1996. 14:233-242 |
| **Janet Baker.**. Developing a care pathway for obese women in pregnancy and beyond. 2011. 19:632-643 12 |
| **Jennifer Guida, Swathy Sundaram and Jenn Leiferman.**. Antenatal physical activity: Investigating the effects on postpartum depression. 2012. 4:1276-1286 11 |
| **Jennifer Jones, Jeff Housman and Willis McAleese.**. Exercise, nutrition, and weight management during pregnancy. 2010. 25:120-128 |
| **Joellen W. Hawkins, Cynthia S. Aber, Alice Cannan, Christine M. Coppinger and Kathleen O'Brien Rafferty.**. Women's reported self-care behaviors during pregnancy. 1998. 19:529-538 |
| **Jonathan Y. Huang, Dodie Arnold, Chun-fang Qiu, Raymond S. Miller, Michelle A. Williams and Daniel A. Enquobahrie.**. Association of Serum Vitamin D with Symptoms of Depression and Anxiety in Early Pregnancy. 2014. 23:588-595 8 |
| **Jovita A. Daniel, K. Venkateswarlu and Clifford C. Ezeugwu.**. Effect of Aerobic Dance Exercise on Blood Pressure of Normotensive Pregnant Women Diagnosed with Gestational Diabetes at Federal Medical Centre, Owerri, South East Nigeria. *Indian Journal of Physiotherapy & Occupational Therapy.* 2015. 9:124-128 |
| **Juan Dertkigil San, J. G. Cecatti, M. A. Sarno, S. R. Cavalcante and E. F. Marussi.**. Variation in the amniotic fluid index following moderate physical activity in water during pregnancy. *Acta Obstet.Gynecol.Scand..* 2007. 86:547-552 |
| **K. A. Cooper, M. E. O'Neill, S. N. Hunyor and E. S. Boyce.**. Hemodynamic responses of trained and sedentary pregnant women to semi-supine cycling. *Journal of Sports Medicine & Physical Fitness.* 1993. 33:203-204 |
| **K. A. Cooper, S. N. Hunyor, E. S. Boyce, M. E. O'Neill and D. B. Frewin.**. Fetal heart rate and maternal cardiovascular and catecholamine responses to dynamic exercise. *Aust.N.Z.J.Obstet.Gynaecol..* 1987. 27:220-223 |
| **K. A. Matthews and J. Rodin.**. Pregnancy alters blood pressure responses to psychological and physical challenge. *Psychophysiology.* 1992. 29:232-240 |
| **K. A. Matthews and J. Rodin.**. Pregnancy alters blood pressure responses to psychological and physical challenge. 1992. 29:232-240 |
| **K. A. Salvesen and S. Morkved.**. Randomised controlled trial of pelvic floor muscle training during pregnancy. *Br.Med.J..* 2004. 329:378-380 |
| **K. A. Salvesen, S. N. Stafne, T. M. Eggebo and S. Morkved.**. Does regular exercise in pregnancy influence duration of labor? A secondary analysis of a randomized controlled trial. *Acta Obstet.Gynecol.Scand..* 2014. 93:73-79 |
| **K. A. Sauder, A. P. Starling, A. L. Shapiro, et al.**. NIHMS788628 Available on 05/01/17] PMC4883104 Available on 05/01/17]; Diet, physical activity and mental health status are associated with dysglycaemia in pregnancy: the Healthy Start Study. *Diabetic Med..* 2016. 33:663-667 |
| **K. A. Webb, L. A. Wolfe and M. J. McGrath.**. Effects of acute and chronic maternal exercise on fetal heart rate. *J.Appl.Physiol..* 1994. 77:2207-2213 |
| **K. B. Lesser, P. A. Gruppuso, R. B. Terry and M. W. Carpenter.**. Exercise fails to improve postprandial glycemic excursion in women with gestational diabetes. *J.Matern.Fetal..* 1996. 5:211-217 |
| **K. B. Lesser, P. A. Gruppuso, R. B. Terry and M. W. Carpenter.**. Exercise fails to improve postprandial glycemic excursion in women with gestational diabetes. 1996. 5:211-217 |
| **K. Baptiste-Roberts, P. Ghosh and W. K. Nicholson.**. PMC3236988; Pregravid physical activity, dietary intake, and glucose intolerance during pregnancy. *Journal of Women's Health.* 2011. 20:1847-1851 |
| **K. Baptiste-Roberts, P. Ghosh and W. K. Nicholson.**. Pregravid physical activity, dietary intake, and glucose intolerance during pregnancy. 2011. 20:1847-1851 |
| **K. Bo and L. A. Haakstad.**. Is pelvic floor muscle training effective when taught in a general fitness class in pregnancy? A randomised controlled trial. 2011. 97:190-195 |
| **K. Bo, C. Fleten and W. Nystad.**. Effect of antenatal pelvic floor muscle training on labor and birth. 2009. 113:1279-1284 |
| **K. Bo, G. Hilde, J. Staer-Jensen, F. Siafarikas, M. K. Tennfjord and M. E. Engh.**. Does general exercise training before and during pregnancy influence the pelvic floor "opening" and delivery outcome? A 3D/4D ultrasound study following nulliparous pregnant women from mid-pregnancy to childbirth. *Br.J.Sports Med..* 2015. 49:196-199 |
| **K. Bø, L. A. H. Haakstad and N. Volder.**. Do pregnant women exercise their pelvic floor muscles?. 2007. 18:733-736 |
| **K. Borodulin, K. R. Evenson and A. H. Herring.**. Physical activity patterns during pregnancy through postpartum. 2009. 9:32 |
| **K. Borodulin, K. R. Evenson and A. H. Herring.**. PMC2784751; Physical activity patterns during pregnancy through postpartum. *BMC Womens Health.* 2009. 9:32 |
| **K. Borodulin, K. R. Evenson, K. Monda, F. Wen, A. H. Herring and N. Dole.**. Physical activity and sleep among pregnant women. 2010. 24:45-52 |
| **K. Broekhuizen, E. Althuizen, M. N. van Poppel, M. Donker and W. van Mechelen.**. From theory to practice: intervention fidelity in a randomized controlled trial aiming to optimize weight development during pregnancy. 2012. 13:816-825 |
| **K. Davis, S. H. Goodman, J. Leiferman, M. Taylor and S. Dimidjian.**. A randomized controlled trial of yoga for pregnant women with symptoms of depression and anxiety. 2015. 21:166-172 |
| **K. Davis, S. H. Goodman, J. Leiferman, M. Taylor and S. Dimidjian.**. A randomized controlled trial of yoga for pregnant women with symptoms of depression and anxiety. *Complementary therapies in clinical practice.* 2015. 21:166-172 |
| **K. E. Brett, Z. M. Ferraro, M. Holcik and K. B. Adamo.**. Prenatal physical activity and diet composition affect the expression of nutrient transporters and mTOR signaling molecules in the human placenta. *Placenta.* 2015. 36:204-212 |
| **K. E. Joung, K. H. Park, A. Filippaios, F. Dincer, H. Christou and C. S. Mantzoros.**. Cord blood irisin levels are positively correlated with birth weight in newborn infants. *Metabolism: Clinical and Experimental.* 2015. 64:1507-1514 |
| **K. E. Lynch, J. R. Landsbaugh, B. W. Whitcomb, P. Pekow, G. Markenson and L. Chasan-Taber.**. Physical Activity of Pregnant Hispanic Women. *Am.J.Prev.Med..* 2012. 43:434-439 |
| **K. E. Lynch, J. R. Landsbaugh, B. W. Whitcomb, P. Pekow, G. Markenson and L. Chasan-Taber.**. Physical activity of pregnant Hispanic women. 2012. 43:434-439 |
| **K. E. Sørensen and K. G. Børlum.**. Fetal heart function in response to short-term maternal exercise. *Br.J.Obstet.Gynaecol..* 1986. 93:310-313 |
| **K. Eliasson, I. Nordlander, B. Larson, M. Hammarstrom and E. Mattsson.**. Influence of physical activity on urinary leakage in primiparous women. 2005. 15:87-94 |
| **K. Eliasson, I. Nordlander, E. Mattsson, B. Larson and M. Hammarstrom.**. Prevalence of urinary leakage in nulliparous women with respect to physical activity and micturition habits. 2004. 15:149-153 |
| **K. F. Foxcroft, I. J. Rowlands, N. M. Byrne, H. D. McIntyre, L. K. Callaway and Bambino group.**. Exercise in obese pregnant women: the role of social factors, lifestyle and pregnancy symptoms. 2011. 11:4 |
| **K. F. Koltyn.**. Mood changes in pregnant women following an exercise session and a prenatal information session. 1994. 4:191-195 |
| **K. Fieril, A. Glantz and M. Fagevik Olsen.**. Hemodynamic responses to single sessions of aerobic exercise and resistance exercise in pregnancy. *Acta Obstet.Gynecol.Scand..* 2016. 21:21 |
| **K. Gjestland, K. Bo, K. M. Owe and M. Eberhard-Gran.**. Do pregnant women follow exercise guidelines? Prevalence data among 3482 women, and prediction of low-back pain, pelvic girdle pain and depression. 2013. 47:515-520 |
| **K. Godfrey, K. Walker-Bone, S. Robinson, et al.**. Neonatal bone mass: influence of parental birthweight, maternal smoking, body composition, and activity during pregnancy. *Journal of Bone & Mineral Research.* 2001. 16:1694-1703 |
| **K. H. Paul, M. L. Graham and C. M. Olson.**. The web of risk factors for excessive gestational weight gain in low income women. 2013. 17:344-351 |
| **K. Haby, A. Glantz, R. Hanas and A. Premberg.**. Mighty Mums - An antenatal health care intervention can reduce gestational weight gain in women with obesity. 2015. 31:685-692 |
| **K. Ihrman.**. A clinical and physiological study of pregnancy in a material from northern Sweden. VIII. The effect of physical training during pregnancy on the circulatory adjustment. *Acta Soc.Med.Ups..* 1960. 65:335-347 |
| **K. J. Guelfi and R. E. Halse.**. Moderate-intensity exercise affects perceived hunger and fullness but not appetite-related hormones in late pregnancy. 2013. 38:1162-1165 |
| **K. J. Guelfi, C. Wang, J. A. Dimmock, B. Jackson, J. P. Newnham and H. Yang.**. PMC4689036; A comparison of beliefs about exercise during pregnancy between Chinese and Australian pregnant women. *BMC Pregnancy & Childbirth.* 2015. 15:345 |
| **K. J. Guelfi, M. J. Ong, P. A. Fournier, et al.**. Does supervised home-based exercise during pregnancy reduce the recurrence of gestational diabetes? A randomised controlled trial. *J.Paediatr.Child Health.* 2015. 51:35 |
| **K. Kumareswaran, D. Elleri, J. M. Allen, et al.**. Accuracy of continuous glucose monitoring during exercise in type 1 diabetes pregnancy. 2013. 15:223-229 |
| **K. Kumareswaran, D. Elleri, J. M. Allen, et al.**. Physical activity energy expenditure and glucose control in pregnant women with type 1 diabetes: is 30 minutes of daily exercise enough?. 2013. 36:1095-1101 |
| **K. L. Kong, C. Campbell, K. Wagner, A. Peterson and L. Lanningham-Foster.**. Impact of a walking intervention during pregnancy on post-partum weight retention and infant anthropometric outcomes. *Journal of developmental origins of health and disease.* 2014. 5:259-267 |
| **K. L. Kong, M. W. Gillman, S. Rifas-Shiman and X. Wen.**. Leisure time physical activity before and during mid-pregnancy and offspring adiposity in mid-childhood. *Pediatric Obesity.* 2015. #volume# |
| **K. L. Kong, M. W. Gillman, S. Rifas-Shiman and X. Wen.**. NIHMS744771 PMC4695314; Leisure time physical activity before and during mid-pregnancy and offspring adiposity in mid-childhood. *Pediatric Obesity.* 2016. 11:81-87 |
| **K. L. Lindsay, C. Heneghan, B. McNulty, L. Brennan and F. M. McAuliffe.**. Lifestyle and dietary habits of an obese pregnant cohort. 2015. 19:25-32 |
| **K. L. Lindsay, C. Heneghan, C. A. McGowan, L. Brennan and F. M. McAuliffe.**. Lifestyle habits in obese pregnancy: A case-control study. *Archives of Disease in Childhood: Fetal and Neonatal Edition.* 2013. 98 |
| **K. Lagana.**. Come bien, camina y no se preocupe--eat right, walk, and do not worry: selective biculturalism during pregnancy in a Mexican American community. 2003. 14:117-124 |
| **K. M. Borodulin, K. R. Evenson, F. Wen, A. H. Herring and A. M. Benson.**. NIHMS366602 PMC3319731; Physical activity patterns during pregnancy. *Medicine & Science in Sports & Exercise.* 2008. 40:1901-1908 |
| **K. M. Borodulin, K. R. Evenson, F. Wen, A. H. Herring and A. M. Benson.**. Physical activity patterns during pregnancy. 2008. 40:1901-1908 |
| **K. M. Gustafson, L. E. May, H. W. Yeh, S. K. Million and J. J. Allen.**. NIHMS474547 PMC3753784; Fetal cardiac autonomic control during breathing and non-breathing epochs: the effect of maternal exercise. *Early Hum.Dev..* 2012. 88:539-546 |
| **K. M. Owe, E. K. Bjelland, B. Stuge, N. Orsini, M. Eberhard-Gran and S. Vangen.**. Exercise level before pregnancy and engaging in high-impact sports reduce the risk of pelvic girdle pain: a population-based cohort study of 39 184 women. *Br.J.Sports Med..* 2016. 50:817-822 |
| **K. M. Owe, W. Nystad and K. B.**. Correlates of regular exercise during pregnancy: the Norwegian Mother and Child Cohort Study. *Scand.J.Med.Sci.Sports.* 2009. 19:637-645 |
| **K. M. Owe, W. Nystad and K. Bo.**. Association between regular exercise and excessive newborn birth weight. *Obstetrics & Gynecology.* 2009. 114:770-776 |
| **K. M. Owe, W. Nystad and K. Bø.**. Correlates of regular exercise during pregnancy: The Norwegian Mother and Child Cohort Study. 2009. 19:637-645 |
| **K. M. Owe, W. Nystad, R. Skjaerven, H. Stigum and K. Bo.**. Exercise during pregnancy and the gestational age distribution: a cohort study. *Medicine & Science in Sports & Exercise.* 2012. 44:1067-1074 |
| **K. M. Smith and C. G. Campbell.**. Physical activity during pregnancy: impact of applying different physical activity guidelines. 2013. 2013:165617 |
| **K. M. Smith, R. C. Foster and C. G. Campbell.**. PMC3221627; Accuracy of physical activity assessment during pregnancy: an observational study. *BMC Pregnancy & Childbirth.* 2011. 11:86 |
| **K. M. Songoygard, S. N. Stafne, K. A. Evensen, K. A. Salvesen, T. Vik and S. Morkved.**. Does exercise during pregnancy prevent postnatal depression? A randomized controlled trial. 2012. 91:62-67 |
| **K. Marsal, G. Gennser and O. Lofgren.**. Effects on fetal breathing movements of maternal challenges. Cross-over study on dynamic work, static work, passive movements, hyperventilation and hyperoxygenation. *Acta Obstet.Gynecol.Scand..* 1979. 58:335-342 |
| **K. Marsal, O. Lofgren and G. Gennser.**. Fetal breathing movements and maternal exercise. *Acta Obstet.Gynecol.Scand..* 1979. 58:197-201 |
| **K. Mattran, L. M. Mudd, R. A. Rudey and J. S. Kelly.**. Leisure-time physical activity during pregnancy and offspring size at 18 to 24 months. *Journal of Physical Activity & Health.* 2011. 8:655-662 |
| **K. Melzer, Y. Schutz, M. Boulvain and B. Kayser.**. Pregnancy-related changes in activity energy expenditure and resting metabolic rate in Switzerland. *Eur.J.Clin.Nutr..* 2009. 63:1185-1191 |
| **K. Melzer, Y. Schutz, N. Soehnchen, et al.**. Effects of recommended levels of physical activity on pregnancy outcomes. *American Journal of Obstetrics & Gynecology.* 2010. 202:266.e1-266.e6 |
| **K. N. Mitchell and B. S. Macneill.**. The aerobic capacity of pregnant-women during nonweight-bearing versus weight-bearing exercise. 1988. 68:860-860 |
| **K. Nelson, V. Lohsoonthorn and M. A. Williams.**. Preterm delivery risk in relation to maternal occupational and leisure time physical activity among thai women. *Asian Biomedicine.* 2009. 3:267-277 |
| **K. P. Fieril, M. F. Olsén, A. Glantz and M. Larsson.**. Experiences of exercise during pregnancy among women who perform regular resistance training: A qualitative study. *Phys.Ther..* 2014. 94:1135-1143 |
| **K. Petrov Fieril, A. Glantz and M. Fagevik Olsen.**. The efficacy of moderate-to-vigorous resistance exercise during pregnancy: a randomized controlled trial. *Acta Obstet.Gynecol.Scand..* 2015. 94:35-42 |
| **K. Phan, P. Bidulka, Y. H. Gomez, et al.**. Effect of Acute Weight Gain and Physical Activity on Arterial Stiffness in Pregnant Women at High Risk for Hypertensive Disorders of Pregnancy. *Can.J.Cardiol..* 2016. 32:S5 |
| **K. Polanska, P. Muszynski, W. Sobala, E. Dziewirska, D. Merecz-Kot and W. Hanke.**. Maternal lifestyle during pregnancy and child psychomotor development - Polish Mother and Child Cohort study. *Early Hum.Dev..* 2015. 91:317-325 |
| **K. Przybylowicz, M. Przybylowicz, M. Grzybiak and K. Janiszewska.**. Effects of physical activity during pregnancy and gestational weight gain on newborn weight and length at birth in Warminsko-Mazurskie province. *Acta Scientiarum Polonorum Technologia Alimentaria.* 2014. 13:203-211 |
| **K. R. Evenson and F. Wen.**. National trends in self-reported physical activity and sedentary behaviors among pregnant women: NHANES 1999-2006. *Prev.Med..* 2010. 50:123-128 |
| **K. R. Evenson and F. Wen.**. National trends in self-reported physical activity and sedentary behaviors among pregnant women: NHANES 1999-2006. 2010. 50:123-128 |
| **K. R. Evenson and F. Wen.**. Prevalence and correlates of objectively measured physical activity and sedentary behavior among US pregnant women. *Prev.Med..* 2011. 53:39-43 |
| **K. R. Evenson and F. Wen.**. Prevalence and correlates of objectively measured physical activity and sedentary behavior among US pregnant women. 2011. 53:39-43 |
| **K. R. Evenson, A. Siega-Riz, D. A. Savitz, J. A. Leiferman and J. M. Thorp J.**. Vigorous leisure activity and pregnancy outcome. *Epidemiology.* 2002. 13:653-659 |
| **K. R. Evenson, A. Siega-Riz, D. A. Savitz, J. A. Leiferman and J. M. Thorp Jr.**. Vigorous leisure activity and pregnancy outcome. *Epidemiology.* 2002. 13:653-659 |
| **K. R. Evenson, D. A. Savitz and S. L. Huston.**. Leisure-time physical activity among pregnant women in the US. 2004. 18:400-407 |
| **K. R. Heineman, S. La Bastide-Van Gemert, V. Fidler, K. J. Middelburg, A. F. Bos and M. Hadders-Algra.**. Construct validity of the Infant Motor Profile: relation with prenatal, perinatal, and neonatal risk factors. 2010. 52:e209-15 |
| **K. R. Kardel, B. Johansen, N. Voldner, P. O. Iversen and T. Henriksen.**. Association between aerobic fitness in late pregnancy and duration of labor in nulliparous women. *Acta Obstet.Gynecol.Scand..* 2009. 88:948-952 |
| **K. R. Kardel.**. Effects of intense training during and after pregnancy in top-level athletes. *Scand.J.Med.Sci.Sports.* 2005. 15:79-86 |
| **K. R. Richardsen, I. Mdala, S. Berntsen, et al.**. PMC4936091; Objectively recorded physical activity in pregnancy and postpartum in a multi-ethnic cohort: association with access to recreational areas in the neighbourhood. *International Journal of Behavioral Nutrition & Physical Activity.* 2016. 13:78 |
| **K. R. Richardsen, R. S. Falk, A. K. Jenum, et al.**. PMC4962490; Predicting who fails to meet the physical activity guideline in pregnancy: a prospective study of objectively recorded physical activity in a population-based multi-ethnic cohort. *BMC Pregnancy & Childbirth.* 2016. 16:186 |
| **K. Rauh, J. Gunther, J. Kunath, L. Stecher and H. Hauner.**. PMC4608142; Lifestyle intervention to prevent excessive maternal weight gain: mother and infant follow-up at 12 months postpartum. *BMC Pregnancy & Childbirth.* 2015. 15:265 |
| **K. Renault, K. Norgaard, K. R. Andreasen, N. J. Secher and L. Nilas.**. Physical activity during pregnancy in obese and normal-weight women as assessed by pedometer. *Acta Obstet.Gynecol.Scand..* 2010. 89:956-961 |
| **K. Renault, K. Norgaard, K. R. Andreasen, N. J. Secher and L. Nilas.**. Physical activity during pregnancy in obese and normal-weight women as assessed by pedometer. 2010. 89:956-961 |
| **K. Renault, K. Norgaard, K. R. Andreasen, N. J. Secher and L. Nilas.**. Physical activity during pregnancy in obese and normal-weight women as assessed by pedometer. *Acta Obstet.Gynecol.Scand..* 2010. 89:956-961 |
| **K. Renault, K. Norgaard, N. J. Secher, K. R. Andreasen, B. Baldur-Felskov and L. Nilas.**. Physical activity during pregnancy in normal-weight and obese women: compliance using pedometer assessment. *Journal of Obstetrics & Gynaecology.* 2012. 32:430-433 |
| **K. Renault, K. Norgaard, N. J. Secher, K. R. Andreasen, B. Baldur-Felskov and L. Nilas.**. Physical activity during pregnancy in normal-weight and obese women: compliance using pedometer assessment. 2012. 32:430-433 |
| **K. S. Haugland, S. Rasmussen and A. K. Daltveit.**. Group intervention for women with pelvic girdle pain in pregnancy. A randomized controlled trial. 2006. 85:1320-1326 |
| **K. Sjogren Forss, E. Ekvall Hansson, M. Troein and L. Stjernberg.**. Patterns of physical activity among women and men before and during pregnancy. 2014. 128:814-816 |
| **K. Soiva, A. Salmi, M. Groenroos and T. Peltonen.**. Physical Working Capacity during Pregnancy and Effect of Physical Work Tests on Foetal Heart Rate. *Ann.Chir.Gynaecol.Fenn..* 1964. 53:187-196 |
| **K. Ueland, M. J. Novy and J. Metcalfe.**. Cardiorespiratory responses to pregnancy and exercise in normal women and patients with heart disease. *American Journal of Obstetrics & Gynecology.* 1973. 115:4-10 |
| **K. Ueland, M. J. Novy and J. Metcalfe.**. Cardiorespiratory responses to pregnancy and exercise in normal women and patients with heart disease. 1973. 115:4-10 |
| **K. Ueland, M. J. Novy, E. N. Peterson and J. Metcalfe.**. Maternal cardiovascular dynamics. IV. The influence of gestational age on the maternal cardiovascular response to posture and exercise. *American Journal of Obstetrics & Gynecology.* 1969. 104:856-864 |
| **K. Ueland, M. J. Novy, E. N. Peterson and J. Metcalfe.**. Maternal cardiovascular dynamics. IV. The influence of gestational age on the maternal cardiovascular response to posture and exercise. 1969. 104:856-864 |
| **K. Wulff and R. Siegmund.**. Emergence of circadian rhythms in infants before and after birth: evidence for variations by parental influence]. *Z.Geburtshilfe Neonatol..* 2002. 206:166-171 |
| **Kimberly R. Andringa, Tyler Bardsley, Amy H. Herring and SeonAe Yeo.**. The Impact of Symptom Type and Frequency on Activity Level During Pregnancy. *Journal of Women's Health Physical Therapy.* 2013. 37:4-10 7p |
| **L. A. Dias, P. Driusso, D. L. Aita, S. M. Quintana, K. Bo and C. H. Ferreira.**. Effect of pelvic floor muscle training on labour and newborn outcomes: a randomized controlled trial. *Revista Brasileira de Fisioterapia.* 2011. 15:487-493 |
| **L. A. D'Silva, R. E. Davies, S. J. Emery and M. J. Lewis.**. Influence of somatic state on cardiovascular measurements in pregnancy. 2014. 35:15-29 |
| **L. A. Haakstad and K. Bo.**. Effect of a regular exercise programme on pelvic girdle and low back pain in previously inactive pregnant women: A randomized controlled trial. 2015. 47:229-234 |
| **L. A. Haakstad and K. Bo.**. PMC3198740; Exercise in pregnant women and birth weight: a randomized controlled trial. *BMC Pregnancy & Childbirth.* 2011. 11:66 |
| **L. A. Haakstad, B. Torset and K. Bo.**. What is the effect of regular group exercise on maternal psychological outcomes and common pregnancy complaints? An assessor blinded RCT. *Midwifery.* 2016. 32:81-86 |
| **L. A. Haakstad, E. Edvardsen and K. Bo.**. Effect of regular exercise on blood pressure in normotensive pregnant women. A randomized controlled trial. *Hypertension in Pregnancy.* 2016. 35:170-180 |
| **L. A. Haakstad, I. Gundersen and K. Bo.**. Self-reporting compared to motion monitor in the measurement of physical activity during pregnancy. 2010. 89:749-756 |
| **L. A. Haakstad, N. Voldner and K. Bo.**. Stages of change model for participation in physical activity during pregnancy. 2013. 2013:193170 |
| **L. A. Haakstad, N. Voldner, T. Henriksen and K. Bo.**. Physical activity level and weight gain in a cohort of pregnant Norwegian women. 2007. 86:559-564 |
| **L. A. Haakstad, N. Voldner, T. Henriksen and K. Bo.**. Why do pregnant women stop exercising in the third trimester?. *Acta Obstet.Gynecol.Scand..* 2009. 88:1267-1275 |
| **L. A. Haakstad, N. Voldner, T. Henriksen and K. Bo.**. Why do pregnant women stop exercising in the third trimester?. 2009. 88:1267-1275 |
| **L. A. Millard, D. A. Lawlor, A. Fraser and L. D. Howe.**. PMC3787488; Physical activity during pregnancy and offspring cardiovascular risk factors: findings from a prospective cohort study.Erratum appears in BMJ Open. 2013;3(12):e003574corr1]. *BMJ Open.* 2013. 3:e003574 |
| **L. A. Pompeii, D. A. Savitz, K. R. Evenson, B. Rogers and M. McMahon.**. Physical exertion at work and the risk of preterm delivery and small-for-gestational-age birth. *Obstetrics & Gynecology.* 2005. 106:1279-1288 |
| **L. A. Pompeii, D. A. Savitz, K. R. Evenson, B. Rogers and M. McMahon.**. Physical exertion at work and the risk of preterm delivery and small-for-gestational-age birth. 2005. 106:1279-1288 |
| **L. A. Wolfe, A. P. Heenan and A. Bonen.**. Aerobic conditioning effects on substrate responses during graded cycling in pregnancy. *Canadian Journal of Physiology & Pharmacology.* 2003. 81:696-703 |
| **L. A. Wolfe, A. P. Heenan and A. Bonen.**. Aerobic conditioning effects on substrate responses during graded cycling in pregnancy. 2003. 81:696-703 |
| **L. A. Wolfe, R. J. Preston, G. W. Burggraf and M. J. McGrath.**. Effects of pregnancy and chronic exercise on maternal cardiac structure and function. *Canadian Journal of Physiology & Pharmacology.* 1999. 77:909-917 |
| **L. A. Wolfe, R. J. Preston, G. W. Burggraf and M. J. McGrath.**. Effects of pregnancy and chronic exercise on maternal cardiac structure and function. 1999. 77:909-917 |
| **L. A. Wolfe, R. J. Preston, G. W. Burggraf and M. J. McGrath.**. Effects of pregnancy and chronic exercise on maternal cardiac structure and function. *Can.J.Physiol.Pharmacol..* 1999. 77:909-917 |
| **L. A. Wolfe, R. M. Walker, A. Bonen and M. J. McGrath.**. Effects of pregnancy and chronic exercise on respiratory responses to graded exercise. 1994. 76:1928-1936 |
| **L. Atkinson, R. L. Shaw and D. P. French.**. Is pregnancy a teachable moment for diet and physical activity behaviour change? An interpretative phenomenological analysis of the experiences of women during their first pregnancy. *British Journal of Health Psychology.* 2016. 11:11 |
| **L. Back, A. Hui, A. Reid, et al.**. Comparison of physical activity and nutritional intake in first nations pregnant women in remote communities and urban-living pregnant women. 2012. 36:64-67 |
| **L. Baghirzada, K. N. Downey and A. J. Macarthur.**. Assessment of quality of life indicators in the postpartum period. 2013. 22:209-216 |
| **L. Basso, P. T. McCollum, M. R. N. Darling, W. A. Tocchi and W. A. Tanner.**. A descriptive study of pregnant women with gallstones. Relation to dietary and social habits, education, physical activity, height, and weight. 1992. 8:629-633 |
| **L. Broberg, A. S. Ersboll, M. G. Backhausen, P. Damm, A. Tabor and H. K. Hegaard.**. Compliance with national recommendations for exercise during early pregnancy in a Danish cohort. 2015. 15:317 |
| **L. Broberg, A. S. Ersboll, M. G. Backhausen, P. Damm, A. Tabor and H. K. Hegaard.**. Compliance with national recommendations for exercise during early pregnancy in a Danish cohort. *Bmc Pregnancy and Childbirth.* 2015. 15 |
| **L. C. Silveira and C. A. Segre.**. Physical exercise during pregnancy and its influence in the type of birth. 2012. 10:409-414 |
| **L. Chasan-Taber, B. H. Marcus, E. Stanek 3, et al.**. PMC2851124; A randomized controlled trial of prenatal physical activity to prevent gestational diabetes: design and methods. *Journal of Women's Health.* 2009. 18:851-859 |
| **L. Chasan-Taber, M. D. Schmidt, P. Pekow, B. Sternfeld, J. Manson and G. Markenson.**. Correlates of physical activity in pregnancy among Latina women. 2007. 11:353-363 |
| **L. Chasan-Taber, M. D. Schmidt, P. Pekow, et al.**. Physical activity and gestational diabetes mellitus among Hispanic women. *Journal of Women's Health.* 2008. 17:999-1008 |
| **L. Chasan-Taber, M. Silveira, B. H. Marcus, B. Braun, E. Stanek and G. Markenson.**. Feasibility and efficacy of a physical activity intervention among pregnant women: the behaviors affecting baby and you (B.A.B.Y.) study. *Journal of physical activity & health.* 2011. 8 Suppl 2:228 |
| **L. Chasan-Taber, M. Silveira, K. E. Lynch, et al.**. Physical activity before and during pregnancy and risk of abnormal glucose tolerance among Hispanic women. *Diabetes Metab..* 2014. 40:67-75 |
| **L. Chasan-Taber, M. Silveira, K. E. Lynch, P. Pekow, C. G. Solomon and G. Markenson.**. Physical activity and gestational weight gain in Hispanic women. 2014. 22:909-918 |
| **L. Chasan-Taber, R. T. Fortner, A. Gollenberg, J. Buonnaccorsi, N. Dole and G. Markenson.**. A prospective cohort study of modifiable risk factors for gestational diabetes among Hispanic women: design and baseline characteristics. 2010. 19:117-124 |
| **L. Chu, R. Retnakaran, B. Zinman, A. J. G. Hanley and J. K. Hamilton.**. Impact of maternal physical activity and infant feeding practices on infant weight gain and adiposity. 2012. 2012 |
| **L. Currie, C. Woolcott, D. F. Fell, B. A. Armson and L. Dodds.**. Physical activity and pregnancy outcomes. *Am.J.Epidemiol..* 2011. 173:S214 |
| **L. D. Devoe, M. Arthur and N. Searle.**. The effects of maternal ambulation on the nonstress test. *American Journal of Obstetrics & Gynecology.* 1987. 157:240-244 |
| **L. D. Platt, R. Artal, J. Semel, L. Sipos and R. K. Kammula.**. Exercise in pregnancy. II. Fetal responses. *American Journal of Obstetrics & Gynecology.* 1983. 147:487-491 |
| **L. D. Platt, R. Artal, J. Semel, L. Sipos and R. K. Kammula.**. Exercise in pregnancy. II. Fetal responses. 1983. 147:487-491 |
| **L. de Wit, J. G. Jelsma, M. N. van Poppel, et al.**. Physical activity, depressed mood and pregnancy worries in European obese pregnant women: results from the DALI study. 2015. 15:158 |
| **L. de Wit, J. G. Jelsma, M. N. van Poppel, et al.**. PMC4521453; Physical activity, depressed mood and pregnancy worries in European obese pregnant women: results from the DALI study. *BMC Pregnancy & Childbirth.* 2015. 15:158 |
| **L. Dibblee and T. E. Graham.**. A longitudinal study of changes in aerobic fitness, body composition, and energy intake in primigravid patients. *American Journal of Obstetrics & Gynecology.* 1983. 147:908-914 |
| **L. E. May, A. Glaros, H. W. Yeh, J. F. Clapp 3 and K. M. Gustafson.**. Aerobic exercise during pregnancy influences fetal cardiac autonomic control of heart rate and heart rate variability. *Early Hum.Dev..* 2010. 86:213-217 |
| **L. E. May, J. Knowlton, J. Hanson, et al.**. Effects of Exercise During Pregnancy on Maternal Heart Rate and Heart Rate Variability. *Pm & R.* 2016. 8:611-617 |
| **L. E. May, R. R. Suminski, A. Berry, M. D. Langaker and K. M. Gustafson.**. Maternal physical activity mode and fetal heart outcome. *Early Hum.Dev..* 2014. 90:365-369 |
| **L. E. May, S. A. Scholtz, R. Suminski and K. M. Gustafson.**. Aerobic exercise during pregnancy influences infant heart rate variability at one month of age. *Early Hum.Dev..* 2014. 90:33-38 |
| **L. E. McCullough, M. A. Mendez, E. E. Miller, A. P. Murtha, S. K. Murphy and C. Hoyo.**. PMC4622928 Available on 04/30/16]; Associations between prenatal physical activity, birth weight, and DNA methylation at genomically imprinted domains in a multiethnic newborn cohort. *Epigenetics: Official Journal of the DNA Methylation Society.* 2015. 10:597-606 |
| **L. Fairley, G. Santorelli, D. A. Lawlor, et al.**. PMC4510905; The relationship between early life modifiable risk factors for childhood obesity, ethnicity and body mass index at age 3 years: findings from the Born in Bradford birth cohort study. *BMC Obesity.* 2015. 2:9 |
| **L. Fenster, A. E. Hubbard, G. C. Windham, K. O. Waller and S. H. Swan.**. A prospective study of work-related physical exertion and spontaneous abortion. *Epidemiology.* 1997. 8:66-74 |
| **L. Fenster, A. E. Hubbard, G. C. Windham, K. O. Waller and S. H. Swan.**. A prospective study of work-related physical exertion and spontaneous abortion. 1997. 8:66-74 |
| **L. Goni, M. Cuervo, S. Santiago, I. Zazpe and J. A. Martinez.**. Parity implications for anthropometrical variables, lifestyle behaviors and dietary habits in pregnant women. *Anales del Sistema Sanitario de Navarra.* 2014. 37:349-362 |
| **L. Goni, M. Cuervo, S. Santiago, I. Zazpe and J. A. Martinez.**. Parity implications for anthropometrical variables, lifestyle behaviors and dietary habits in pregnant women. 2014. 37:349-362 |
| **L. H. Colbert, B. I. Graubard, K. B. Michels, W. C. Willett and M. R. Forman.**. Physical activity during pregnancy and age at menarche of the daughter. *Cancer Epidemiology Biomarkers & Prevention.* 2008. 17:2656-2662 |
| **L. Haakstad and K. Bo.**. Effect of supervised aerobic dance exercise in prevention of excessive weight gain in pregnancy: A single blind randomized controlled trial. *International Journal of Gynecology and Obstetrics.* 2009. 107:S198 |
| **L. Hayes, C. McParlin, T. I. Kinnunen, et al.**. Change in level of physical activity during pregnancy in obese women: findings from the UPBEAT pilot trial. 2015. 15:52 |
| **L. Hayes, C. McParlin, T. I. Kinnunen, et al.**. Change in level of physical activity during pregnancy in obese women: findings from the UPBEAT pilot trial. *BMC pregnancy and childbirth.* 2015. 15:52 |
| **L. Hayes, C. McParlin, T. I. Kinnunen, et al.**. PMC4352291; Change in level of physical activity during pregnancy in obese women: findings from the UPBEAT pilot trial. *BMC Pregnancy & Childbirth.* 2015. 15:52 |
| **L. Hayes, R. Bell, S. C. Robson and L. Poston.**. Physical activity in the uk pregnancy better eating and physical activity trial (UPBEAT). *Diabetic Med..* 2016. 33:6-7 |
| **L. J. Lee, E. Symanski, P. J. Lupo, et al.**. HHSPA786527 Available on 02/01/17] PMC4888062 Available on 02/01/17]; Data linkage between the National Birth Defects Prevention Study and the Occupational Information Network (O NET) to assess workplace physical activity, sedentary behaviors, and emotional stressors during pregnancy. *Am.J.Ind.Med..* 2016. 59:137-149 |
| **L. J. Mayberry, M. Smith and P. Gill.**. Effect of exercise on uterine activity in the patient in preterm labor. 1992. 12:354-358 |
| **L. Jovanovic, A. Kessler and C. M. Peterson.**. Human maternal and fetal response to graded exercise. *J.Appl.Physiol..* 1985. 58:1719-1722 |
| **L. Jovanovic-Peterson, E. P. Durak and C. M. Peterson.**. Randomized trial of diet versus diet plus cardiovascular conditioning on glucose levels in gestational diabetes. *American Journal of Obstetrics & Gynecology.* 1989. 161:415-419 |
| **L. Jovanovic-Peterson, E. P. Durak and C. M. Peterson.**. Randomized trial of diet versus diet plus cardiovascular conditioning on glucose levels in gestational diabetes. 1989. 161:415-419 |
| **L. K. Andersen, M. Backhausen, H. K. Hegaard and M. Juhl.**. Physical exercise and pelvic girdle pain in pregnancy: A nested case-control study within the Danish National Birth Cohort. 2015. 6:198-203 |
| **L. K. Badr, B. Abdallah and A. Mahmoud.**. Precursors of preterm birth: comparison of three ethnic groups in the middle East and the United States. 2005. 34:444-452 |
| **L. K. Callaway, P. B. Colditz, N. M. Byrne, et al.**. PMC2890340; Prevention of gestational diabetes: feasibility issues for an exercise intervention in obese pregnant women. *Diabetes Care.* 2010. 33:1457-1459 |
| **L. K. Micklesfield, N. S. Levitt, M. T. Carstens, M. A. Dhansay, S. A. Norris and E. V. Lambert.**. Early life and current determinants of bone in South African children of mixed ancestral origin. 2007. 34:647-655 |
| **L. Kovaleva.**. Assessment of risk factors of urinary incontinence in pregnancy, effect of pelvic floor muscle training. *Int.Urogynecol.J.Pelvic Floor Dysfunct..* 2011. 22:S1473 |
| **L. Larsson and P. G. Lindqvist.**. Low-impact exercise during pregnancy--a study of safety. *Acta Obstet.Gynecol.Scand..* 2005. 84:34-38 |
| **L. Larsson and P. G. Lindqvist.**. Low-impact exercise during pregnancy--a study of safety. 2005. 84:34-38 |
[truncated: 325,715 more chars]
